# Supplementary material for: Redox-neutral dehydrogenative cross-coupling of alcohols and amines enabled by nickel catalysis
Source: Royal Society of Chemistry journal article supplement (doi:10.1039/d2qo00004k), 2022-01-01

## Supporting Information

# Redox-Neutral Dehydrogenative Cross-Coupling of Alcohols and Amines Enabled by Nickel Catalysis

Zijuan Yan,<sup>S,†</sup> Feipeng Liu,<sup>S,†</sup> Xuchao Wang,<sup>†</sup> Qing Qiang,<sup>†</sup> Yongjie Li,<sup>‡</sup> Yao Zhang,<sup>‡</sup>  
and Zi-Qiang Rong<sup>\*,†</sup>

<sup>†</sup>Frontiers Science Center for Flexible Electronics (FSCFE), Shaanxi Institute of Flexible Electronics (SIFE) & Shaanxi Institute of Biomedical Materials and Engineering (SIBME), Northwestern Polytechnical University (NPU), 127 West Youyi Road, Xi'an 710072, P. R. China

<sup>‡</sup>College of Chemistry, Liaoning University, Shenyang, 110036, P. R. China

### Table of Contents

|                                                                                                       |     |
|-------------------------------------------------------------------------------------------------------|-----|
| 1. General Considerations                                                                             | S2  |
| 2. Supplementary Table                                                                                | S3  |
| 3. General procedure for the preparation of allylic alcohols                                          | S4  |
| 4. General procedures for the redox-neutral nickel-catalyzed dehydrogenative cross-coupling reactions | S4  |
| 5. Characterization data for the products                                                             | S4  |
| 6. Mechanism Studies                                                                                  | S16 |
| 7. Supplementary References                                                                           | S16 |
| 8. <sup>1</sup> H NMR, <sup>13</sup> C NMR, and <sup>19</sup> F NMR spectra                           | S17 |

## 1. General Considerations

Unless noted otherwise, all solvents were dried by filtration through a Pure-Solv MD-5 Solvent Purification System (Innovative Technology). Toluene was carefully freeze-pump-thawed and dried by 4A molecular sieves (activated at 350 °C for 8h). Reaction temperatures were reported as the temperatures of the bath surrounding the flasks or cylindrical pressure vessel. Sensitive reagents and solvents were transferred under nitrogen into a nitrogen-filled glovebox with standard techniques. Analytical thin-layer chromatography (TLC) was carried out using 0.2 mm commercial silica gel plates (silica gel 60, F254, Leyan chemical). Cylindrical pressure vessel (26 x 109 mm (15 mL) with PTFE lined cap attached) were purchased from Synthware. Nuclear magnetic resonance spectra (<sup>1</sup>H NMR, <sup>13</sup>C NMR and <sup>19</sup>F NMR) were recorded with a Bruker Model DMX 500 (500 MHz, <sup>1</sup>H at 500 MHz, <sup>13</sup>C at 126 MHz). Chemical shifts were reported in parts per million (ppm, δ), downfield from tetramethylsilane (TMS, δ=0.00ppm) and were referenced to residual solvent (CDCl<sub>3</sub>, δ=7.26 ppm (<sup>1</sup>H) and 77.00 ppm (<sup>13</sup>C)). All the <sup>19</sup>F chemical shifts were not referenced. Coupling constants were reported in Hertz (Hz). Data for <sup>1</sup>H NMR spectra were reported as follows: chemical shift (ppm, referenced to protium, s = singlet, d = doublet, t = triplet, q = quartet, quin = quintet, dd = doublet of doublets, td = triplet of doublets, ddd = doublet of doublet of doublets, m = multiplet, coupling constant (Hz), and integration). All other materials were obtained from Rhawn Corporation, Aladdin Bio-Chem Technology or Energy chemical and were used as received.

## 2. Supplementary Table

### Optimization of Reaction Conditions<sup>[a]</sup>

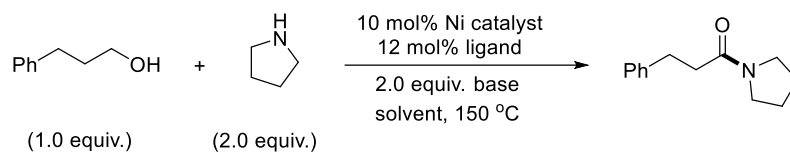

| Entry | Catalyst                           | Ligand           | Base                            | Solvent                  | Yield <sup>b</sup> |
|-------|------------------------------------|------------------|---------------------------------|--------------------------|--------------------|
| 1     | Ni(cod) <sub>2</sub>               | IPr              | Et <sub>3</sub> N               | benzene                  | 88%                |
| 2     | Ni(OTf) <sub>2</sub>               | IPr              | Et <sub>3</sub> N               | benzene                  | 11%                |
| 3     | Ni(PPh <sub>3</sub> ) <sub>4</sub> | IPr              | Et <sub>3</sub> N               | benzene                  | 7%                 |
| 4     | Ni(cod) <sub>2</sub>               | IMes             | Et <sub>3</sub> N               | benzene                  | 19%                |
| 5     | Ni(cod) <sub>2</sub>               | Triphos          | Et <sub>3</sub> N               | benzene                  | trace              |
| 6     | Ni(cod) <sub>2</sub>               | PCy <sub>3</sub> | Et <sub>3</sub> N               | benzene                  | trace              |
| 7     | Ni(cod) <sub>2</sub>               | dppp             | Et <sub>3</sub> N               | benzene                  | trace              |
| 8     | Ni(cod) <sub>2</sub>               | Sphos            | Et <sub>3</sub> N               | benzene                  | trace              |
| 9     | Ni(cod) <sub>2</sub>               | IPr              | DIPEA                           | benzene                  | 64%                |
| 10    | Ni(cod) <sub>2</sub>               | IPr              | TMP                             | benzene                  | 61%                |
| 11    | Ni(cod) <sub>2</sub>               | IPr              | Na <sub>2</sub> CO <sub>3</sub> | benzene                  | 64%                |
| 12    | Ni(cod) <sub>2</sub>               | IPr              | K <sub>2</sub> HPO <sub>4</sub> | benzene                  | 62%                |
| 13    | Ni(cod) <sub>2</sub>               | IPr              | K <sub>3</sub> PO <sub>4</sub>  | benzene                  | 48%                |
| 14    | Ni(cod) <sub>2</sub>               | IPr              | DABCO                           | benzene                  | 65%                |
| 15    | Ni(cod) <sub>2</sub>               | IPr              | Et <sub>3</sub> N               | toluene                  | 29%                |
| 16    | Ni(cod) <sub>2</sub>               | IPr              | Et <sub>3</sub> N               | cyclopentyl methyl ether | 48%                |
| 17    | Ni(cod) <sub>2</sub>               | IPr              | Et <sub>3</sub> N               | Xylene                   | 34%                |
| 18    | Ni(cod) <sub>2</sub>               | IPr              | Et <sub>3</sub> N               | THF                      | 17%                |
| 19    | Ni(cod) <sub>2</sub>               | IPr              | Et <sub>3</sub> N               | TBME                     | 39%                |
| 20    | Ni(cod) <sub>2</sub>               | IPr              | Et <sub>3</sub> N               | 1,4-dioxane              | trace              |

[a] Reaction condition: alcohol (0.3 mmol, 1.0 equiv.), amine (0.6 mmol, 2.0 equiv.), base (2.0 equiv.), solvent (2 mL), 150 °C under N<sub>2</sub> for 20 h. [b] Yield was detected by NMR.

### 3. General procedure for the Preparation of allylic alcohols

Allylic alcohols **1b–1z**, **1a'–1c'** were prepared according to previous literature procedures <sup>[1]</sup>.

### 4. General procedures for the redox-neutral nickel-catalyzed dehydrogenative cross-coupling reactions

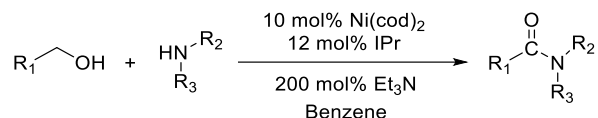

A flame-dried 15 mL cylindrical pressure vessel was charged with alcohol (0.3 mmol, 1.0 equiv.) and amine (0.6 mmol, 2.0 equiv.). The cylindrical pressure vessel was directly transferred into a nitrogen-filled glovebox without caps. Then, Ni(cod)<sub>2</sub> (8.3 mg, 0.03 mmol, 10 mol%), IPr (14.0 mg, 0.036 mmol, 12 mol%), Et<sub>3</sub>N (60.7 mg, 0.6 mmol, 2.0 equiv.) and 2.0 mL dry benzene were added. Then the cylindrical pressure vessel was tightly sealed, transferred out of the glovebox and stirred at 130 °C or 150 °C with corresponding reaction time. After the completion of reaction, the solvent was removed in vacuo and the residue was purified by flash column chromatography on silica gel to give the desired amide products.

### 5. Characterization data for the products

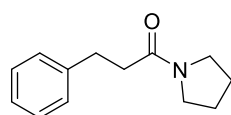

**3a** (CAS: 151647-54-0). <sup>1</sup>H NMR (500 MHz, CDCl<sub>3</sub>) δ 7.31–7.17 (m, 5H), 3.46 (t, *J* = 6.8 Hz, 2H), 3.28 (t, *J* = 6.7 Hz, 2H), 3.03–2.94 (m, 2H), 2.61–2.51 (m, 2H), 1.92–1.77 (m, 4H). <sup>13</sup>C NMR (126 MHz, CDCl<sub>3</sub>) δ 170.8, 141.6, 128.5, 128.4, 126.1, 46.6, 45.7, 36.8, 31.2, 26.1, 24.4.

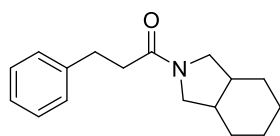

**3b** (CAS: 1789209-15-9). <sup>1</sup>H NMR (500 MHz, CDCl<sub>3</sub>) δ 7.32–7.27 (m, 2H), 7.23–7.17 (m, 3H), 3.56 (t, *J* = 5.5 Hz, 2H), 3.33 (t, *J* = 5.5 Hz, 2H), 2.97 (t, *J* = 8.1 Hz, 2H), 2.62 (t, *J* = 8.0 Hz, 2H), 1.63–1.57 (m, 2H), 1.54–1.48 (m, 2H), 1.40–1.32 (m, 2H). <sup>13</sup>C NMR (126 MHz, CDCl<sub>3</sub>) δ 171.5, 141.5, 128.5, 128.5, 126.1, 50.6, 49.6, 37.6, 36.6, 35.9, 31.4, 25.7, 22.7, 22.7.

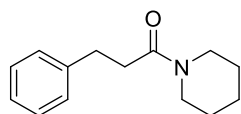

**3c** (CAS: 21924-11-8). <sup>1</sup>H NMR (500 MHz, CDCl<sub>3</sub>) δ 7.42–7.34 (m, 3H), 7.31–7.26 (m, 3H), 7.24–7.17 (m, 3H), 3.27 (t, *J* = 7.7 Hz, 2H), 3.05 (t, *J* = 7.7 Hz, 2H). <sup>13</sup>C NMR (126 MHz, CDCl<sub>3</sub>) δ 170.2, 141.3, 128.3, 128.3, 125.9, 46.4, 42.5, 35.0, 31.5,

26.2, 25.4, 24.4.

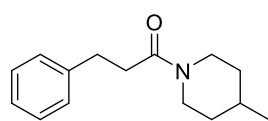

**3d** (CAS: 349643-98-7).  $^1\text{H NMR}$  (500 MHz,  $\text{CDCl}_3$ )  $\delta$  7.33–7.28 (m, 2H), 7.28–7.18 (m, 3H), 4.64–4.59 (m, 1H), 3.80–3.74 (m, 1H), 3.00–2.95 (m, 2H), 2.93–2.89 (m, 1H), 2.66–2.62 (m, 2H), 2.58–2.52 (m, 1H), 1.69–1.55 (m, 3H), 1.12–1.03 (m, 1H), 1.01–0.95 (m, 1H), 0.94 (d,  $J = 6.4$  Hz, 3H).  $^{13}\text{C NMR}$  (126 MHz,  $\text{CDCl}_3$ )  $\delta$  170.4, 141.5, 128.5, 128.5, 126.1, 45.9, 42.1, 35.2, 34.5, 33.8, 31.7, 31.1, 21.7.

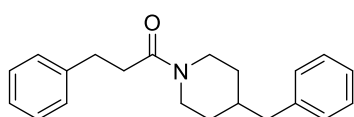

**3e** (CAS: 349419-32-5).  $^1\text{H NMR}$  (500 MHz,  $\text{CDCl}_3$ )  $\delta$  7.34–7.05 (m, 10H), 4.64–4.60 (m, 1H), 3.77–3.72 (m, 1H), 2.96 (t,  $J = 7.4$  Hz, 2H), 2.87–2.81 (m, 1H), 2.63–2.43 (m, 5H), 1.73–1.64 (m, 2H), 1.61–1.57 (m, 1H), 1.16–1.07 (m, 1H), 1.01–0.92 (m, 1H).  $^{13}\text{C NMR}$  (126 MHz,  $\text{CDCl}_3$ )  $\delta$  170.5, 141.5, 140.0, 129.1, 128.5, 128.3, 126.1, 126.1, 45.9, 43.0, 42.1, 38.2, 35.2, 32.4, 31.8, 31.7.

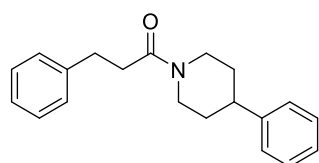

**3f** (CAS: 2183648-12-4).  $^1\text{H NMR}$  (500 MHz,  $\text{CDCl}_3$ )  $\delta$  7.36–7.32 (m, 4H), 7.30–7.22 (m, 4H), 7.22–7.16 (m, 2H), 4.87–4.83 (m, 1H), 3.97–3.92 (m, 1H), 3.16–2.96 (m, 3H), 2.81–2.59 (m, 4H), 1.96–1.81 (m, 2H), 1.66–1.58 (m, 1H), 1.51–1.42 (m, 1H).  $^{13}\text{C NMR}$  (126 MHz,  $\text{CDCl}_3$ )  $\delta$  170.6, 145.2, 141.4, 128.6, 128.5, 128.5, 126.8, 126.5, 126.2, 46.3, 42.8, 42.6, 35.2, 33.8, 32.9, 31.7.

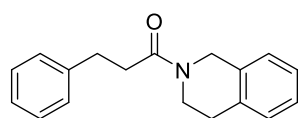

**3g** (CAS: 349431-73-8).  $^1\text{H NMR}$  (500 MHz,  $\text{CDCl}_3$ ) (amide rotamers 1.3:1)  $\delta$  7.35–7.06 (m, 9H), 4.78 (s, 1.12H), 4.57 (s, 0.87H), 3.87 (t,  $J = 6.0$  Hz, 0.88H), 3.63 (t,  $J = 5.9$  Hz, 1.12H), 3.08–3.02 (m, 2H), 2.89–2.83 (m, 2H), 2.79–2.71 (m, 2H).  $^1\text{H NMR}$  (500 MHz,  $\text{DMSO}-d_6$ , 60 °C)  $\delta$  7.28–7.24 (m, 4H), 7.20–7.15 (m, 5H), 4.62 (s, 2H), 3.75–3.67 (brs, 2H), 2.89 (t,  $J = 7.7$  Hz, 2H), 2.80 (brs, 2H), 2.72 (t,  $J = 7.7$  Hz, 2H).  $^{13}\text{C NMR}$  (126 MHz,  $\text{CDCl}_3$ ) (mixture of rotamers, all peaks listed)  $\delta$  171.2, 171.1, 141.4, 141.4, 135.1, 134.1, 133.6, 132.6, 129.0, 128.6, 128.5, 128.5, 128.5, 128.3, 126.9, 126.7, 126.6, 126.6, 126.3, 126.2, 126.2, 126.1, 47.3, 44.3, 43.2, 39.7, 35.83, 35.6, 31.5, 31.4, 29.5, 28.6.

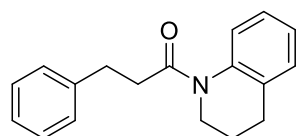

**3h** (CAS: 349644-04-8).  $^1\text{H NMR}$  (500 MHz,  $\text{CDCl}_3$ )  $\delta$  7.53–6.87 (m, 9H), 3.79 (t,  $J = 6.6$  Hz, 2H), 3.04 (t,  $J = 7.7$  Hz, 2H), 2.88–2.85 (m, 2H), 2.62 (t,  $J = 7.1$  Hz, 2H), 1.91–1.85 (m, 2H).  $^{13}\text{C NMR}$  (126 MHz,  $\text{CDCl}_3$ )  $\delta$  172.0,

141.1, 139.1, 128.5, 128.5, 128.4, 126.1, 126.1, 125.3, 124.7, 42.9, 36.2, 32.1, 26.7, 24.1.

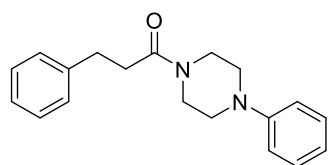

**3i** (CAS: 303066-54-8).  $^1\text{H NMR}$  (500 MHz,  $\text{CDCl}_3$ )  $\delta$  7.36–7.20 (m, 7H), 7.02–6.82 (m, 3H), 3.81 (t,  $J = 5.3$  Hz, 2H), 3.56 (t,  $J = 5.3$  Hz, 2H), 3.20–3.11 (m, 2H), 3.11–2.98 (m, 4H), 2.78–2.62 (m, 2H).  $^{13}\text{C NMR}$  (126 MHz,  $\text{CDCl}_3$ )  $\delta$  170.7, 151.0, 141.2, 129.3, 128.6, 128.5, 126.3, 120.6, 116.7, 49.6, 49.4, 45.5, 41.6, 35.1, 31.6.

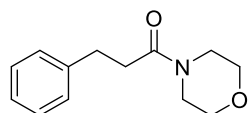

**3j** (CAS: 17077-46-2).  $^1\text{H NMR}$  (500 MHz,  $\text{CDCl}_3$ )  $\delta$  7.31–7.27 (m, 2H), 7.25–7.15 (m, 3H), 3.64–3.61 (m, 4H), 3.54–3.48 (m, 2H), 3.39–3.32 (m, 2H), 3.02–2.94 (m, 2H), 2.63–2.60 (m, 2H).  $^{13}\text{C NMR}$  (126 MHz,  $\text{CDCl}_3$ )  $\delta$  170.9, 141.1, 128.6, 128.5, 126.3, 66.9, 66.5, 46.0, 42.0, 34.8, 31.5.

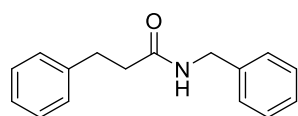

**3k** (CAS: 10264-10-5).  $^1\text{H NMR}$  (500 MHz,  $\text{CDCl}_3$ )  $\delta$  7.35–7.26 (m, 5H), 7.26–7.19 (m, 3H), 7.19–7.13 (m, 2H), 5.71 (s, 1H), 4.42 (d,  $J = 5.7$  Hz, 2H), 3.02 (t,  $J = 7.6$  Hz, 2H), 2.54 (t,  $J = 7.6$  Hz, 2H).  $^{13}\text{C NMR}$  (126 MHz,  $\text{CDCl}_3$ )  $\delta$  171.9, 140.8, 138.2, 128.7, 128.6, 128.4, 127.8, 127.5, 126.3, 43.6, 38.5, 31.7.

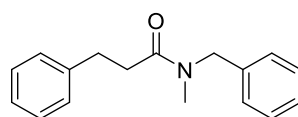

**3l** (CAS: 61751-42-6).  $^1\text{H NMR}$  (500 MHz,  $\text{CDCl}_3$ ) (amide rotamers 1.4:1)  $\delta$  7.38–7.19 (m, 9H), 7.18–7.06 (m, 1H), 4.63 (s, 1.15H), 4.49 (s, 0.84H), 3.10–3.01 (m, 2H), 2.98 (s, 1.15H), 2.88 (s, 1.81H), 2.73–2.69 (m, 2H).  $^{13}\text{C NMR}$  (126 MHz,  $\text{CDCl}_3$ ) (mixture of rotamers, all peaks listed)  $\delta$  172.6, 172.3, 141.4, 141.3, 137.4, 136.6, 128.9, 128.6, 128.5, 128.5, 128.1, 127.6, 127.3, 126.3, 126.2, 126.1, 53.3, 50.9, 35.4, 35.0, 34.8, 34.0, 31.6, 31.4.

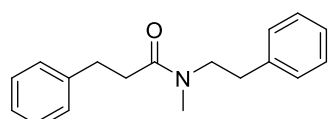

**3m** (CAS: 152328-83-1).  $^1\text{H NMR}$  (500 MHz,  $\text{DMSO}-d_6$ , 60 °C)  $\delta$  7.32–7.10 (m, 10H), 3.50 (t,  $J = 7.4$  Hz, 2H), 2.91–2.81 (m, 4H), 2.80–2.74 (m, 2H), 2.70 (t,  $J = 7.6$  Hz, 1H), 2.57 (t,  $J = 7.7$  Hz, 1H), 2.37 (t,  $J = 7.8$  Hz, 1H).

$^{13}\text{C NMR}$  (126 MHz,  $\text{CDCl}_3$ ) (mixture of rotamers, all peaks listed)  $\delta$  172.1, 171.9, 141.5, 139.2, 138.2, 128.9, 128.8, 128.5, 128.5, 128.4, 126.8, 126.3, 126.1, 126.0, 51.5, 50.1, 36.1, 35.5, 34.8, 34.7, 33.8, 33.6, 31.4, 31.3.

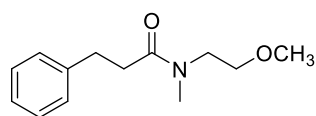

**3n**: Yellow oil.  $^1\text{H NMR}$  (500 MHz,  $\text{CDCl}_3$ ) (amide rotamers 1.6:1)  $\delta$  7.33–7.20 (m, 5H), 3.59–3.53 (m, 2H), 3.44 (s, 2H), 3.36 (s, 1.81H), 3.33 (s, 1.12H), 3.05–2.94 (m, 5H), 2.71–2.62 (m, 2H).  $^1\text{H NMR}$  (500 MHz,  $\text{DMSO}-d_6$ , 60 °C)  $\delta$  7.28–7.20 (m, 4H), 7.20–7.15 (m, 1H), 3.46–3.40 (m, 4H), 3.17 (s, 3H), 3.17 (s, 3H),

2.96 (s, 2H), 2.83 (t,  $J = 7.7$  Hz, 3H), 2.64-2.58 (m, 2H).  $^{13}\text{C}$  NMR (126 MHz,  $\text{CDCl}_3$ ) (mixture of rotamers, all peaks listed)  $\delta$  172.6, 172.3, 141.7, 141.5, 128.5, 128.4, 126.1, 126.0, 71.1, 70.2, 59.1, 58.8, 49.6, 47.8, 36.9, 35.5, 34.9, 34.0, 31.5, 31.3. HRMS (ESI): Calculated for  $\text{C}_{13}\text{H}_{19}\text{NO}_2$   $[\text{M}+\text{Na}]^+$ : 244.1318, found: 244.1308.

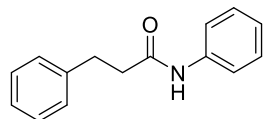

**3o** (CAS: 3271-81-6).  $^1\text{H}$  NMR (500 MHz,  $\text{CDCl}_3$ )  $\delta$  7.42 (d,  $J = 8.0$  Hz, 2H), 7.32-7.28 (m, 4H), 7.26-7.19 (m, 3H), 7.09 (t,  $J = 7.4$  Hz, 1H), 7.00 (s, 1H), 3.06 (t,  $J = 7.6$  Hz, 2H), 2.66 (t,  $J = 7.6$  Hz, 2H).  $^{13}\text{C}$  NMR (126 MHz,  $\text{CDCl}_3$ )  $\delta$  170.3, 140.6, 137.7, 129.0, 128.7, 128.4, 126.4, 124.3, 119.9, 39.6, 31.6.

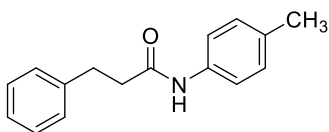

**3p** (CAS: 71231-25-9).  $^1\text{H}$  NMR (500 MHz,  $\text{CDCl}_3$ )  $\delta$  7.29 (t,  $J = 7.3$  Hz, 4H), 7.24-7.20 (m, 3H), 7.09 (d,  $J = 8.2$  Hz, 2H), 7.02 (s, 1H), 3.04 (t,  $J = 7.6$  Hz, 2H), 2.64 (t,  $J = 7.6$  Hz, 2H), 2.30 (s, 3H).  $^{13}\text{C}$  NMR (126 MHz,  $\text{CDCl}_3$ )  $\delta$  170.3, 140.7, 135.2, 134.0, 129.5, 128.7, 128.4, 126.4, 120.1, 39.5, 31.6, 20.9.

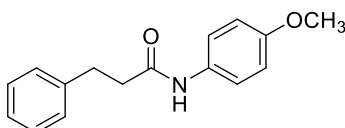

**3q** (CAS: 97754-31-9).  $^1\text{H}$  NMR (500 MHz,  $\text{CDCl}_3$ )  $\delta$  7.35-7.27 (m, 4H), 7.25-7.19 (m, 3H), 7.01 (s, 1H), 6.85-6.79 (m, 2H), 3.77 (s, 3H), 3.04 (t,  $J = 7.6$  Hz, 2H), 2.63 (t,  $J = 7.7$  Hz, 2H).  $^{13}\text{C}$  NMR (126 MHz,  $\text{CDCl}_3$ )

$\delta$  170.3, 156.4, 140.8, 128.6, 128.4, 126.4, 122.0, 114.1, 55.5, 39.3, 31.7.

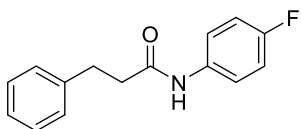

**3r** (CAS: 5298-86-2).  $^1\text{H}$  NMR (500 MHz,  $\text{CDCl}_3$ )  $\delta$  7.41-737 (m, 2H), 7.33-7.28 (m, 3H), 7.27-7.23 (m, 3H), 7.00-6.97 (m, 2H), 3.06 (t,  $J = 7.6$  Hz, 2H), 2.66 (t,  $J = 7.6$  Hz, 2H).  $^{13}\text{C}$  NMR (126 MHz,  $\text{CDCl}_3$ )  $\delta$  170.5, 159.4 (d,  $J =$

243.2 Hz), 140.6, 133.7, 128.7, 128.4, 126.5, 121.9 (d,  $J = 8.1$  Hz), 115.6 (d,  $J = 22.3$  Hz), 39.3, 31.6.  $^{19}\text{F}$  NMR (471 MHz,  $\text{CDCl}_3$ )  $\delta$  -118.0.

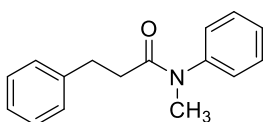

**3s** (CAS: 18859-20-6).  $^1\text{H}$  NMR (500 MHz,  $\text{CDCl}_3$ )  $\delta$  7.41-7.33 (m, 2H), 7.30 (t,  $J = 7.5$  Hz, 1H), 7.22 (t,  $J = 7.4$  Hz, 2H), 7.16 (t,  $J = 7.4$  Hz, 1H), 7.06 (d,  $J = 7.5$  Hz, 2H), 7.02 (d,  $J = 7.6$  Hz, 2H), 3.25 (s, 3H), 2.91 (t,  $J = 7.9$  Hz, 2H), 2.37 (t,

$J = 7.9$  Hz, 2H).  $^{13}\text{C}$  NMR (126 MHz,  $\text{CDCl}_3$ )  $\delta$  172.2, 144.0, 141.3, 129.8, 128.4, 128.4, 127.8, 127.3, 126.0, 37.4, 36.0, 31.8.

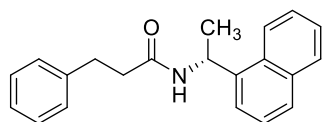

**3t:** White solid. Melting point: 166–167 °C. <sup>1</sup>H NMR (500 MHz, CDCl<sub>3</sub>) δ 8.11–8.06 (m, 1H), 7.92–7.86 (m, 1H), 7.84–7.79 (m, 1H), 7.58–7.50 (m, 2H), 7.46–7.38 (m, 2H), 7.28–7.23 (m, 2H), 7.23–7.12 (m, 3H), 5.98–5.88 (m, 1H), 5.60 (d, *J* = 8.3 Hz, 1H), 3.07–2.91 (m, 2H), 2.48 (t, *J* = 7.5 Hz, 2H), 1.61 (d, *J* = 6.7 Hz, 3H). <sup>13</sup>C NMR (126 MHz, CDCl<sub>3</sub>) δ 170.9, 140.8, 138.2, 133.9, 131.1, 128.8, 128.5, 128.5, 128.4, 128.4, 126.6, 126.2, 125.9, 125.2, 123.5, 122.5, 44.6, 38.5, 31.7, 20.6. HRMS (ESI): Calculated for C<sub>21</sub>H<sub>21</sub>NO [M+H]<sup>+</sup>: 304.1703, found: 304.1696.

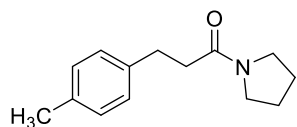

**4a** (CAS: 932163-41-2). <sup>1</sup>H NMR (500 MHz, CDCl<sub>3</sub>) δ 7.15–7.09 (m, 4H), 3.48 (t, *J* = 6.8 Hz, 2H), 3.31 (t, *J* = 6.7 Hz, 2H), 2.99–2.92 (m, 2H), 2.59–2.52 (m, 2H), 2.33 (s, 3H), 1.94–1.87 (m, 2H), 1.85–1.80 (m, 2H). <sup>13</sup>C NMR (126 MHz, CDCl<sub>3</sub>) δ 170.9, 138.5, 135.5, 129.1, 128.3, 46.6, 45.6, 37.0, 30.8, 26.1, 24.4, 21.0.

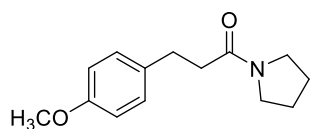

**4b** (CAS: 56004-07-0). <sup>1</sup>H NMR (500 MHz, CDCl<sub>3</sub>) δ 7.14 (d, *J* = 8.3 Hz, 2H), 6.82 (d, *J* = 8.3 Hz, 2H), 3.78 (s, 3H), 3.46 (t, *J* = 6.8 Hz, 2H), 3.29 (t, *J* = 6.7 Hz, 2H), 2.99–2.85 (m, 2H), 2.59–2.47 (m, 2H), 1.91–1.78 (m, 4H). <sup>13</sup>C NMR (126 MHz, CDCl<sub>3</sub>) δ 170.9, 133.6, 129.4, 113.8, 55.3, 46.6, 45.6, 37.0, 30.3, 26.1, 24.4.

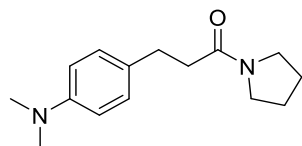

**4c** (CAS: 1379169-29-5). <sup>1</sup>H NMR (500 MHz, CDCl<sub>3</sub>) δ 7.10 (d, *J* = 8.4 Hz, 2H), 6.69 (d, *J* = 8.4 Hz, 2H), 3.46 (t, *J* = 6.8 Hz, 2H), 3.30 (t, *J* = 6.7 Hz, 2H), 2.91 (s, 6H), 2.91–2.87 (m, 2H), 2.55–2.48 (m, 2H), 1.89–1.85 (m, 2H), 1.84–1.79 (m, 2H). <sup>13</sup>C NMR (126 MHz, CDCl<sub>3</sub>) δ 171.2, 129.7, 129.1, 113.1, 46.6, 45.6, 40.9, 37.3, 30.3, 26.1, 24.4.

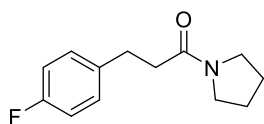

**4d** (CAS: 1090435-97-4). <sup>1</sup>H NMR (500 MHz, CDCl<sub>3</sub>) δ 7.21–7.15 (m, 2H), 6.98–6.92 (m, 2H), 3.45 (t, *J* = 6.8 Hz, 2H), 3.29 (t, *J* = 6.7 Hz, 2H), 2.95 (t, *J* = 7.8 Hz, 2H), 2.53 (t, *J* = 7.7 Hz, 2H), 1.92–1.86 (m, 2H), 1.84–1.77 (m, 2H). <sup>13</sup>C NMR (126 MHz, CDCl<sub>3</sub>) δ 170.5, 161.4 (d, *J* = 243.6 Hz), 137.2 (d, *J* = 3.0 Hz), 129.9 (d, *J* = 7.5 Hz), 115.2 (d, *J* = 21.1 Hz), 46.6, 45.6, 36.7, 30.3, 26.1, 24.4. <sup>19</sup>F NMR (471 MHz, CDCl<sub>3</sub>) δ -117.4.



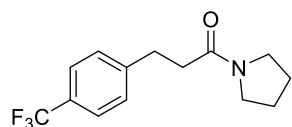

**4e** (CAS: 2322107-62-8). <sup>1</sup>H NMR (500 MHz, CDCl<sub>3</sub>) δ 7.53 (d, *J* = 7.9 Hz, 2H), 7.35 (d, *J* = 7.9 Hz, 2H), 3.47 (t, *J* = 6.8 Hz, 2H), 3.32 (t, *J* = 6.7 Hz, 2H), 3.05 (t, *J* = 7.7 Hz, 2H), 2.58 (t, *J* = 7.7 Hz, 2H), 1.94–1.88 (m, 2H), 1.86–1.79 (m, 2H). <sup>13</sup>C NMR (126 MHz, CDCl<sub>3</sub>) δ 170.0, 145.7, 128.8, 128.4 (q, *J* = 32.7 Hz), 125.2 (q, *J* = 3.7 Hz), 124.2 (q, *J* = 274.5 Hz), 46.4, 45.6, 36.0, 30.7, 26.0, 24.3. <sup>19</sup>F NMR (471 MHz, CDCl<sub>3</sub>) δ -62.4.

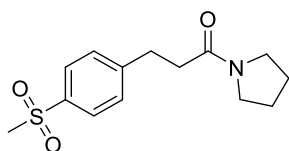

**4f** (CAS: 2326249-72-1). <sup>1</sup>H NMR (500 MHz, CDCl<sub>3</sub>) δ 7.85 (d, *J* = 7.9 Hz, 2H), 7.44 (d, *J* = 7.9 Hz, 2H), 3.46 (t, *J* = 6.8 Hz, 2H), 3.33 (t, *J* = 6.7 Hz, 2H), 3.09 (t, *J* = 7.5 Hz, 2H), 3.04 (s, 3H), 2.60 (t, *J* = 7.5 Hz, 2H), 1.96–1.89 (m, *J* = 6.7 Hz, 2H), 1.87–1.80 (m, *J* = 6.7 Hz, 2H). <sup>13</sup>C NMR (126 MHz, CDCl<sub>3</sub>) δ 169.8, 148.3, 138.3, 129.5, 127.6, 46.6, 45.8, 44.6, 35.8, 30.8, 26.1, 24.4.

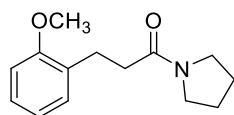

**4g** (CAS: 1458527-03-1). <sup>1</sup>H NMR (500 MHz, CDCl<sub>3</sub>) δ 7.21–7.16 (m, 2H), 6.91–6.81 (m, 2H), 3.82 (s, 3H), 3.46 (t, *J* = 6.8 Hz, 2H), 3.32 (t, *J* = 6.7 Hz, 2H), 3.01–2.91 (m, 2H), 2.59–2.46 (m, 2H), 1.91–1.86 (m, 2H), 1.85–1.79 (m, 2H). <sup>13</sup>C NMR (126 MHz, CDCl<sub>3</sub>) δ 171.4, 157.5, 130.2, 129.8, 127.4, 120.5, 110.2, 55.2, 46.5, 45.6, 35.1, 26.3, 26.1, 24.4.

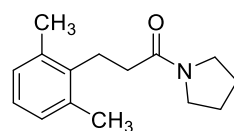

**4h**: Yellow oil. <sup>1</sup>H NMR (500 MHz, CDCl<sub>3</sub>) δ 7.04–6.97 (m, 3H), 3.49 (t, *J* = 6.8 Hz, 2H), 3.29 (t, *J* = 6.7 Hz, 2H), 3.04–2.98 (m, 2H), 2.43–2.38 (m, 2H), 2.34 (s, 6H), 1.94–1.82 (m, 4H). <sup>13</sup>C NMR (126 MHz, CDCl<sub>3</sub>) δ 170.8, 138.0, 136.1, 128.1, 125.8, 46.4, 45.6, 33.7, 26.0, 24.8, 24.3, 19.7. HRMS (ESI): Calculated for C<sub>15</sub>H<sub>21</sub>NO [M+H]<sup>+</sup>: 232.1706, found: 232.1696.

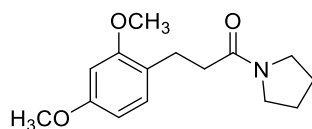

**4i**: Yellow oil. <sup>1</sup>H NMR (500 MHz, CDCl<sub>3</sub>) δ 7.08 (d, *J* = 8.2 Hz, 1H), 6.44 (d, *J* = 2.3 Hz, 1H), 6.41 (dd, *J* = 8.3, 2.4 Hz, 1H), 3.80 (s, 3H), 3.78 (s, 3H), 3.46 (t, *J* = 6.8 Hz, 2H), 3.32 (t, *J* = 6.7 Hz, 2H), 2.95–2.84 (m, 2H), 2.55–2.45 (m, 2H), 1.91–1.84 (m, 4H). <sup>13</sup>C NMR (126 MHz, CDCl<sub>3</sub>) δ 171.5, 159.4, 158.4, 130.4, 122.2, 103.8, 98.5, 55.4, 55.2, 46.5, 45.6, 35.4, 26.1, 25.7, 24.4. HRMS (ESI): Calculated for C<sub>15</sub>H<sub>21</sub>NO<sub>3</sub> [M+H]<sup>+</sup>: 264.1600, found: 264.1594.

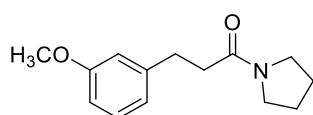

**4j** (CAS: 131656-86-5). <sup>1</sup>H NMR (500 MHz, CDCl<sub>3</sub>) δ 7.21 (t, *J* = 7.8 Hz, 1H), 6.83 (d, *J* = 7.5 Hz, 1H), 6.79 (s, 1H), 6.75 (dd, *J* = 8.2, 2.6 Hz, 1H),

3.80 (s, 3H), 3.47 (t,  $J = 6.8$  Hz, 2H), 3.31 (t,  $J = 6.7$  Hz, 2H), 2.97 (t,  $J = 8.0$  Hz, 2H), 2.57 (t,  $J = 7.9$  Hz, 2H), 1.93-1.80 (m, 4H).  $^{13}\text{C NMR}$  (126 MHz,  $\text{CDCl}_3$ )  $\delta$  170.7, 159.6, 143.1, 129.3, 120.7, 114.1, 111.3, 55.1, 46.5, 45.6, 36.6, 31.2, 26.0, 24.3.

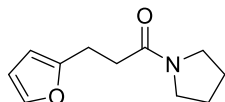

**4k** (CAS: 154011-61-7).  $^1\text{H NMR}$  (500 MHz,  $\text{CDCl}_3$ )  $\delta$  7.32 – 7.28 (m, 1H), 6.29-6.27(m, 1H), 6.05-6.01 (m, 1H), 3.47 (t,  $J = 6.9$  Hz, 2H), 3.36 (t,  $J = 6.8$  Hz, 2H), 3.00(t,  $J = 7.7$  Hz, 2H), 2.60(t,  $J = 7.7$  Hz, 2H), 1.96-1.90 (m, 2H), 1.87-1.81(m, 2H).  $^{13}\text{C NMR}$  (126 MHz,  $\text{CDCl}_3$ )  $\delta$  170.2, 155.1, 141.90, 110.2, 105.2, 46.5, 45.7, 33.2, 26.1, 24.4, 23.5.

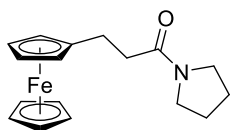

**4l**: Yellow solid. Melting point: 78–79 °C.  $^1\text{H NMR}$  (500 MHz,  $\text{CDCl}_3$ )  $\delta$  4.09 (s, 5H), 4.07 (s, 2H), 4.03 (s, 2H), 3.44 (t,  $J = 6.8$  Hz, 2H), 3.29 (t,  $J = 6.7$  Hz, 2H), 2.68 (t,  $J = 7.9$  Hz, 2H), 2.43 (t,  $J = 7.8$  Hz, 2H), 1.91-1.84 (m, 2H), 1.83-1.79 (m, 2H).  $^{13}\text{C NMR}$  (126 MHz,  $\text{CDCl}_3$ )  $\delta$  170.9, 88.0, 68.4, 68.0, 67.2, 46.5, 45.5, 36.5, 26.0, 25.0, 24.3. HRMS (ESI): Calculated for  $\text{C}_{17}\text{H}_{21}\text{FeNO}$   $[\text{M}+\text{Na}]^+$ : 334.0872, found: 334.0865.

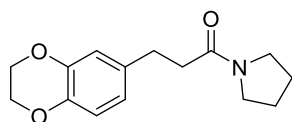

**4m** (CAS: 1088196-64-8).  $^1\text{H NMR}$  (500 MHz,  $\text{CDCl}_3$ )  $\delta$  6.76 (d,  $J = 8.2$  Hz, 1H), 6.71 (s, 1H), 6.68 (d,  $J = 8.2$  Hz, 1H), 4.22 (s, 4H), 3.45 (t,  $J = 6.9$  Hz, 2H), 3.30 (t,  $J = 6.7$  Hz, 2H), 2.86 (t,  $J = 8.0$  Hz, 2H), 2.50 (t,  $J = 8.0$  Hz, 2H), 1.91-1.80(m, 4H).  $^{13}\text{C NMR}$  (126 MHz,  $\text{CDCl}_3$ )  $\delta$  170.8, 143.3, 141.8, 134.8, 121.3, 117.1, 117.0, 64.4, 64.3, 46.6, 45.7, 36.9, 30.4, 26.1, 24.4.

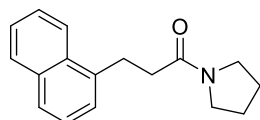

**4n** (CAS: 2363125-90-8).  $^1\text{H NMR}$  (500 MHz,  $\text{CDCl}_3$ )  $\delta$  8.07 (d,  $J = 8.4$  Hz, 1H), 7.85 (d,  $J = 8.1$  Hz, 1H), 7.79 – 7.67 (m, 1H), 7.52-7.45 (m, 2H), 7.40-7.36(m, 2H), 3.46 (t,  $J = 7.6$  Hz, 4H), 3.26 – 3.04 (m, 2H), 2.68 (t,  $J = 8.1$  Hz, 2H), 1.80-1.75 (m, 4H).  $^{13}\text{C NMR}$  (126 MHz,  $\text{CDCl}_3$ )  $\delta$  170.9, 137.7, 131.7, 128.8, 126.9, 126.2, 126.0, 125.7, 125.6, 123.7, 46.5, 45.7, 36.0, 28.3, 26.0, 24.4.

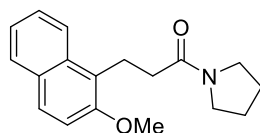

**4o**: Colorless oil.  $^1\text{H NMR}$  (500 MHz,  $\text{CDCl}_3$ )  $\delta$  8.05 (d,  $J = 8.6$  Hz, 1H), 7.80 (d,  $J = 8.2$  Hz, 1H), 7.76 (d,  $J = 8.9$  Hz, 1H), 7.50 (t,  $J = 7.7$  Hz, 1H), 7.35 (t,  $J = 7.5$  Hz, 1H), 7.30 – 7.27 (m, 1H), 3.97 (s, 3H), 3.50-3.44 (m, 4H), 3.25 (t,  $J = 6.4$  Hz, 2H), 2.57 (t,  $J = 8.2$  Hz, 2H), 1.86 – 1.77 (m, 4H).  $^{13}\text{C NMR}$  (126 MHz,  $\text{CDCl}_3$ )  $\delta$  171.4, 154.3, 132.7, 129.1, 128.4, 127.8, 126.4, 123.2, 123.0, 122.6, 113.1, 56.4, 46.4, 45.6, 34.8, 26.0, 24.3, 20.6. HRMS (ESI):

Calculated for  $C_{18}H_{21}NO_2$   $[M+Na]^+$ : 306.1474, found: 306.1465.

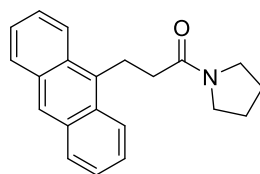

**4p**: Colorless oil.  $^1H$ NMR (500 MHz,  $CDCl_3$ )  $\delta$  8.36 (s, 1H), 8.31 (d,  $J = 8.8$  Hz, 2H), 8.01 (d,  $J = 8.3$  Hz, 2H), 7.55-7.50 (m, 2H), 7.50 – 7.43 (m, 2H), 4.07 – 3.97 (m, 2H), 3.47 (t,  $J = 6.6$  Hz, 2H), 3.02 (t,  $J = 6.4$  Hz, 2H), 2.76 – 2.69 (m,

2H), 1.77 – 1.68 (m, 4H).  $^{13}C$ NMR (126 MHz,  $CDCl_3$ )  $\delta$  170.9, 133.7, 131.6, 129.6, 129.2, 126.1, 125.8, 125.0, 124.2, 46.4, 45.8, 35.79, 25.9, 24.3, 23.2. HRMS (ESI): Calculated for  $C_{21}H_{21}NO$   $[M+H]^+$ : 304.1705, found: 304.1696.

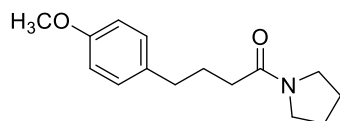

**4q** (CAS: 2340760-34-9).  $^1H$ NMR (500 MHz,  $CDCl_3$ )  $\delta$  7.12 (d,  $J = 8.6$  Hz, 2H), 6.84 (d,  $J = 8.6$  Hz, 2H), 3.80 (s, 3H), 3.47 (t,  $J = 6.9$  Hz, 2H), 3.34 (t,  $J = 6.8$  Hz, 2H), 2.64 (t,  $J = 7.5$  Hz, 2H), 2.26 (t,  $J = 7.5$  Hz, 2H),

2.01-1.90 (m, 4H), 1.88-1.81 (m, 2H).  $^{13}C$ NMR (126 MHz,  $CDCl_3$ )  $\delta$  171.4, 157.8, 133.9, 129.4, 113.7, 55.3, 46.5, 45.6, 34.4, 33.9, 26.5, 26.1, 24.4.

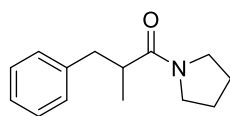

**4r** (CAS: 200283-03-0).  $^1H$ NMR (500 MHz,  $CDCl_3$ )  $\delta$  7.23 (t,  $J = 7.5$  Hz, 2H), 7.24 – 7.19 (m, 3H), 3.44 – 3.32 (m, 2H), 3.28-3.23(m, 1H), 2.98-2.89 (m, 2H), 2.78-2.73 (m, 1H), 2.62 (dd,  $J = 13.1, 6.4$  Hz, 1H), 1.80-1.61 (m, 4H), 1.14 (d,  $J = 6.7$  Hz,

3H).  $^{13}C$ NMR (126 MHz,  $CDCl_3$ )  $\delta$  174.2, 140.1, 128.9, 128.1, 126.0, 46.2, 45.5, 40.5, 40.4, 25.8, 24.1, 17.3.

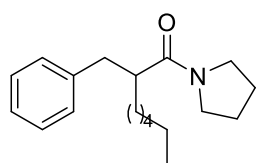

**4s**: Colorless oil.  $^1H$ NMR (500 MHz,  $CDCl_3$ )  $\delta$  7.26 – 7.20 (m, 2H), 7.20 – 7.09 (m, 3H), 3.41 – 3.34 (m, 2H), 3.22 – 3.18 (m, 1H), 2.97 – 2.87 (m, 1H), 2.77 – 2.64 (m, 3H), 1.81 – 1.42 (m, 6H), 1.28-1.23 (m, 8H), 0.87 (t,  $J = 6.7$  Hz, 3H).

$^{13}C$ NMR (126 MHz,  $CDCl_3$ ) 140.3, 128.9, 128.2, 126.1, 46.8, 46.3, 45.4, 39.7, 33.0, 31.8, 29.4, 27.7, 25.9, 24.2, 22.6, 14.1. HRMS (ESI): Calculated for  $C_{25}H_{39}NO$   $[M+Na]^+$ : 392.2927, found: 392.2924.

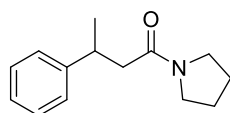

**4t** (CAS: 243466-37-7).  $^1H$ NMR (500 MHz,  $CDCl_3$ )  $\delta$  7.31 – 7.24 (m, 4H), 7.21-7.17 (m, 1H), 3.47 – 3.37 (m, 3H), 3.35 – 3.29 (m, 1H), 3.14-3.09 (m, 1H), 2.57 – 2.45 (m, 2H), 1.88 – 1.73 (m, 4H), 1.34 (d,  $J = 7.0$  Hz, 3H).  $^{13}C$ NMR (126 MHz,  $CDCl_3$ )

$\delta$  170.3, 146.6, 128.4, 126.9, 126.2, 46.7, 45.6, 43.6, 36.4, 26.0, 24.4, 21.4.

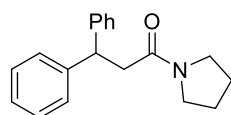

**4u** (CAS: 348607-78-3).  $^1\text{H NMR}$  (500 MHz,  $\text{CDCl}_3$ )  $\delta$  7.29-7.22 (m, 8H), 7.19-7.14 (m, 2H), 4.71 (t,  $J = 7.5$  Hz, 1H), 3.37 (t,  $J = 6.6$  Hz, 2H), 3.19 (t,  $J = 6.5$  Hz, 2H), 2.98 (d,  $J = 7.5$  Hz, 2H), 1.79-1.71 (m, 4H).  $^{13}\text{C NMR}$  (126 MHz,  $\text{CDCl}_3$ )  $\delta$  169.7, 144.3, 128.4, 127.9, 126.3, 47.0, 46.6, 45.6, 41.0, 26.0, 24.3.

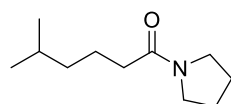

**4v** (CAS: 2134594-44-6).  $^1\text{H NMR}$  (500 MHz,  $\text{CDCl}_3$ )  $\delta$  3.46 (t,  $J = 6.9$  Hz, 2H), 3.41 (t,  $J = 6.8$  Hz, 2H), 2.24 (t,  $J = 7.7$  Hz, 2H), 1.98-1.91 (m, 2H), 1.89-1.81 (m, 2H), 1.69-1.63 (m, 2H), 1.59-1.53 (m, 1H), 1.25-1.18 (m, 2H), 0.89 (d,  $J = 6.6$  Hz, 6H).  $^{13}\text{C NMR}$  (126 MHz,  $\text{CDCl}_3$ )  $\delta$  171.9, 46.6, 45.6, 38.8, 35.1, 27.9, 26.1, 24.4, 22.8, 22.6.

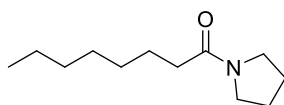

**4w** (CAS: 20299-80-3).  $^1\text{H NMR}$  (500 MHz,  $\text{CDCl}_3$ )  $\delta$  3.46 (t,  $J = 6.9$  Hz, 2H), 3.41 (t,  $J = 6.8$  Hz, 2H), 2.25 (t,  $J = 7.7$  Hz, 2H), 1.97-1.92 (m, 2H), 1.87-1.81 (m, 2H), 1.68-1.61 (m, 2H), 1.33-1.27 (m, 8H), 0.88 (t,  $J = 6.6$  Hz, 3H).  $^{13}\text{C NMR}$  (126 MHz,  $\text{CDCl}_3$ )  $\delta$  171.9, 46.6, 45.6, 34.9, 31.7, 29.5, 29.1, 26.2, 25.0, 24.4, 22.63, 14.1.

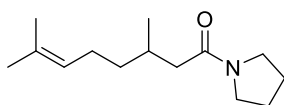

**4x** (CAS: 80016-69-9).  $^1\text{H NMR}$  (500 MHz,  $\text{CDCl}_3$ )  $\delta$  5.09 (t,  $J = 7.3$  Hz, 1H), 3.45 (t,  $J = 6.9$  Hz, 2H), 3.40 (t,  $J = 6.8$  Hz, 2H), 2.29-2.22 (m, 1H), 2.09-1.91 (m, 6H), 1.87-1.80 (m, 2H), 1.66 (s, 3H), 1.58 (s, 3H), 1.41-1.35 (m, 1H), 1.26-1.15 (m, 1H), 0.94 (d,  $J = 6.0$  Hz, 3H).  $^{13}\text{C NMR}$  (126 MHz,  $\text{CDCl}_3$ )  $\delta$  2171.2, 131.2, 124.5, 46.7, 45.5, 42.1, 37.1, 29.8, 26.1, 25.6, 25.5, 24.4, 19.8, 17.6.

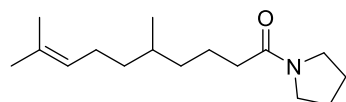

**4y**: Yellow oil.  $^1\text{H NMR}$  (500 MHz,  $\text{CDCl}_3$ )  $\delta$  5.08 (t,  $J = 7.2$  Hz, 1H), 3.45 (t,  $J = 6.9$  Hz, 2H), 3.40 (t,  $J = 6.8$  Hz, 2H), 2.27-2.20 (m, 2H), 1.98-1.89 (m, 4H), 1.86-1.82 (m, 2H), 1.66 (s, 3H), 1.59 (s, 3H), 1.47-1.28 (m, 4H), 1.28-1.21 (m, 1H), 1.19-1.09 (m, 2H), 0.87 (d,  $J = 6.6$  Hz, 3H).  $^{13}\text{C NMR}$  (126 MHz,  $\text{CDCl}_3$ )  $\delta$  171.7, 130.9, 124.7, 46.5, 45.6, 36.9, 36.7, 35.1, 32.2, 26.0, 25.6, 25.4, 24.3, 22.4, 19.4, 17.5. HRMS (ESI): Calculated for  $\text{C}_{16}\text{H}_{29}\text{NO}$   $[\text{M}+\text{H}]^+$ : 252.2330, found: 252.2322.

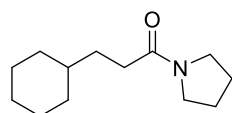

**4z** (CAS: 72299-21-9).  $^1\text{H NMR}$  (500 MHz,  $\text{CDCl}_3$ )  $\delta$  3.45-3.37 (m, 4H), 2.24 (t,  $J = 8.0$ , 2H), 1.94-1.80 (m, 4H), 1.77-1.57 (m, 5H), 1.58-1.46 (m, 2H), 1.30-1.06 (m, 4H), 0.93-0.84 (m, 2H).  $^{13}\text{C NMR}$  (126 MHz,  $\text{CDCl}_3$ )  $\delta$  172.2, 46.6, 45.6, 37.5, 33.2, 32.3, 28.9, 26.6, 26.3, 26.1, 25.9, 24.4.

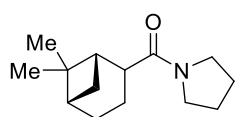

**4a'**: Colorless oil. <sup>1</sup>H NMR (500 MHz, CDCl<sub>3</sub>) δ 3.75 – 3.16 (m, 4H), 2.97 (t, J = 8.7 Hz, 1H), 2.36 – 2.20 (m, 1H), 2.15-2.09 (m, 1H), 2.07 – 1.62 (m, 9H), 1.58-1.51 (m, 1H), 1.22 (s, 3H), 0.88 (s, 3H). <sup>13</sup>C NMR (126 MHz, CDCl<sub>3</sub>) δ 174.6, 46.0, 45.8, 43.8, 40.1, 39.7, 39.3, 26.6, 26.2, 24.2, 24.1, 23.8, 20.1, 16.4. HRMS (ESI): Calculated for C<sub>14</sub>H<sub>23</sub>NO [M+Na]<sup>+</sup>: 244.1680, found: 244.1672.

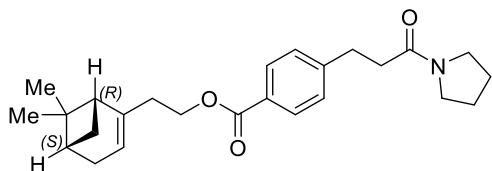

**4b'**: Colorless oil. <sup>1</sup>H NMR (500 MHz, CDCl<sub>3</sub>) δ 7.95 (d, J = 7.8 Hz, 2H), 7.30 (d, J = 7.8 Hz, 2H), 5.37 (s, 1H), 4.35-4.29 (m, 2H), 3.47 (t, J = 6.8 Hz, 2H), 3.31 (t, J = 6.7 Hz, 2H), 3.05 (t, J = 7.8 Hz, 2H), 2.59 (t, J = 7.8 Hz, 2H), 2.44-2.36 (m, 3H), 2.29-2.19 (m, 2H), 2.15-2.09 (m, 2H), 1.93-1.80 (m, 4H), 1.28 (s, 3H), 1.18 (d, J = 8.6 Hz, 1H), 0.85 (s, 3H). <sup>13</sup>C NMR (126 MHz, CDCl<sub>3</sub>) δ 170.2, 166.5, 147.0, 144.3, 129.8, 128.5, 128.4, 118.9, 63.2, 46.6, 45.8, 45.7, 40.7, 38.0, 36.2, 36.1, 31.7, 31.4, 31.1, 26.3, 26.1, 24.4, 21.2. HRMS (ESI): Calculated for C<sub>25</sub>H<sub>33</sub>NO<sub>3</sub> [M+H]<sup>+</sup>: 396.2537, found: 396.2533.

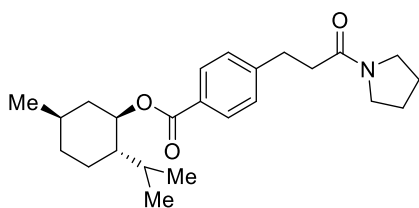

**4c'**: Colorless oil. <sup>1</sup>H NMR (500 MHz, CDCl<sub>3</sub>) δ 7.98 (d, J = 7.8 Hz, 2H), 7.32 (d, J = 7.9 Hz, 2H), 4.96-4.90 (m, 1H), 3.48 (t, J = 6.9 Hz, 2H), 3.33 (t, J = 6.7 Hz, 2H), 3.06 (t, J = 7.8 Hz, 2H), 2.59 (t, J = 7.8 Hz, 2H), 2.14-2.10 (m, 1H), 2.00-1.95 (m, 1H), 1.92-1.89 (m, 2H), 1.86-1.81 (m, 2H), 1.77 – 1.72 (m, 2H), 1.60-1.53 (m, 2H), 1.21 – 1.04 (m, 3H), 0.94 (d, J = 7.3 Hz, 3H), 0.93 (d, J = 7.3 Hz, 3H), 0.80 (d, J = 6.9 Hz, 3H). <sup>13</sup>C NMR (126 MHz, CDCl<sub>3</sub>) δ 170.2, 166.1, 146.9, 129.8, 128.8, 128.5, 74.7, 47.3, 46.6, 45.7, 41.0, 36.2, 34.4, 31.5, 31.1, 26.5, 26.1, 24.4, 23.7, 22.1, 20.8, 16.6. HRMS (ESI): Calculated for C<sub>24</sub>H<sub>35</sub>NO<sub>3</sub> [M+H]<sup>+</sup>: 386.2699, found: 386.2690.

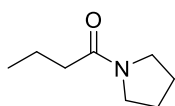

**6a** (CAS: 33527-93-4). <sup>1</sup>H NMR (500 MHz, CDCl<sub>3</sub>) δ 3.47 (t, J = 6.9 Hz, 2H), 3.42 (t, J = 6.8 Hz, 2H), 2.25 (t, J = 7.6 Hz, 2H), 1.98–1.92 (m, 2H), 1.89–1.82 (m, 2H), 1.68 (h, J = 7.4 Hz, 2H), 0.97 (t, J = 7.4 Hz, 3H). <sup>13</sup>C NMR (126 MHz, CDCl<sub>3</sub>) δ 171.9, 46.7, 45.6, 36.8, 26.1, 24.4, 18.4, 14.0.

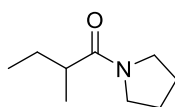

**6b** (CAS: 349422-58-8). <sup>1</sup>H NMR (500 MHz, CDCl<sub>3</sub>) δ 3.51-3.43 (m, 4H), 2.49-2.41 (m, 1H), 1.98-1.92 (m, 2H), 1.89 – 1.82 (m, 2H), 1.74-1.66 (m, 1H), 1.46 – 1.37 (m, 1H), 1.11 (d, J = 6.8 Hz, 3H), 0.89 (t, J = 7.4 Hz, 3H). <sup>13</sup>C NMR δ 175.3, 46.5, 45.7, 39.6, 27.0,

26.2, 24.3, 16.9, 12.1.

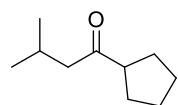

**6c** (CAS: 60026-17-7).  $^1\text{H NMR}$  (500 MHz,  $\text{CDCl}_3$ )  $\delta$  3.47 (t,  $J = 6.9$  Hz, 2H), 3.42 (t,  $J = 6.8$  Hz, 2H), 2.22–2.14 (m, 3H), 1.98–1.91 (m, 2H), 1.89–1.82 (m, 2H), 0.97 (d,  $J = 6.2$  Hz, 6H).  $^{13}\text{C NMR}$  (126 MHz,  $\text{CDCl}_3$ )  $\delta$  171.3, 46.8, 45.5, 43.7, 26.1, 25.5, 24.4, 22.7.

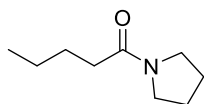

**6d** (CAS: 4419-57-2).  $^1\text{H NMR}$  (500 MHz,  $\text{CDCl}_3$ )  $\delta$  3.46 (t,  $J = 6.9$  Hz, 2H), 3.42 (t,  $J = 6.8$  Hz, 2H), 2.29–2.23 (m, 2H), 1.98–1.92 (m, 2H), 1.88–1.81 (m, 2H), 1.66–1.60 (m, 2H), 1.41–1.33 (m, 2H), 0.93 (t,  $J = 7.3$  Hz, 3H).  $^{13}\text{C NMR}$  (126 MHz,  $\text{CDCl}_3$ )  $\delta$  172.0, 46.6, 45.6, 34.6, 27.1, 26.1, 24.4, 22.6, 13.9.

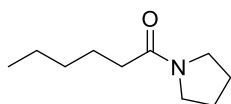

**6e** (CAS: 3389-56-8).  $^1\text{H NMR}$  (500 MHz,  $\text{CDCl}_3$ )  $\delta$  3.46 (t,  $J = 6.9$  Hz, 2H), 3.41 (t,  $J = 6.8$  Hz, 2H), 2.30–2.21 (m, 2H), 1.97–1.92 (m, 2H), 1.88–1.82 (m, 2H), 1.69–1.62 (m, 2H), 1.37–1.30 (m, 4H), 0.90 (t,  $J = 6.9$  Hz, 3H).  $^{13}\text{C NMR}$  (126 MHz,  $\text{CDCl}_3$ )  $\delta$  171.9, 46.6, 45.6, 34.8, 31.7, 26.1, 24.6, 24.4, 22.5, 14.0.

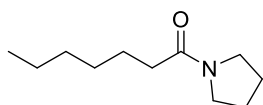

**6f** (CAS: 70974-42-4).  $^1\text{H NMR}$  (500 MHz,  $\text{CDCl}_3$ )  $\delta$  3.44 (t,  $J = 6.9$  Hz, 2H), 3.40 (t,  $J = 6.8$  Hz, 2H), 2.26–2.21 (m, 2H), 1.96–1.90 (m, 2H), 1.86–1.80 (m, 2H), 1.65–1.59 (m, 2H), 1.35–1.26 (m, 6H), 0.86 (t,  $J = 6.7$  Hz, 3H).  $^{13}\text{C NMR}$  (126 MHz,  $\text{CDCl}_3$ )  $\delta$  171.9, 46.6, 45.6, 34.8, 31.6, 29.2, 26.1, 24.9, 24.4, 22.5, 14.0.

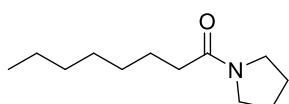

**6g** (CAS: 20299-80-3).  $^1\text{H NMR}$  (500 MHz,  $\text{CDCl}_3$ )  $\delta$  3.46 (t,  $J = 7.0$  Hz, 2H), 3.41 (t,  $J = 6.8$  Hz, 2H), 2.25 (t,  $J = 7.7$  Hz, 2H), 1.98–1.91 (m, 2H), 1.89–1.81 (m, 2H), 1.68–1.61 (m, 2H), 1.34–1.25 (m, 8H), 0.88 (t,  $J = 6.7$  Hz, 3H).  $^{13}\text{C NMR}$  (126 MHz,  $\text{CDCl}_3$ )  $\delta$  172.0, 46.6, 45.6, 34.9, 31.7, 29.5, 29.1, 26.1, 25.0, 24.4, 22.6, 14.1.

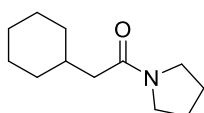

**6h** (CAS: 72299-06-0).  $^1\text{H NMR}$  (500 MHz,  $\text{CDCl}_3$ )  $\delta$  3.46 (t,  $J = 6.9$  Hz, 2H), 3.42 (t,  $J = 6.7$  Hz, 2H), 2.14 (d,  $J = 6.8$  Hz, 2H), 1.97–1.90 (m, 2H), 1.87–1.81 (m, 3H), 1.78–1.73 (m, 2H), 1.70–1.61 (m, 3H), 1.31–1.26 (m, 2H), 1.17–1.08 (m, 1H), 0.98–0.90 (m, 2H).  $^{13}\text{C NMR}$  (126 MHz,  $\text{CDCl}_3$ )  $\delta$  171.4, 46.9, 45.6, 42.5, 34.9, 33.4, 26.3, 26.2, 26.1, 24.4.

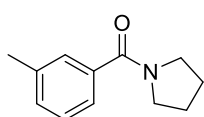

**6i** (CAS: 164918-75-6).  $^1\text{H NMR}$  (500 MHz,  $\text{CDCl}_3$ )  $\delta$  7.36–7.20 (m, 4H), 3.65 (t,  $J = 7.0$  Hz, 2H), 3.42 (t,  $J = 6.7$  Hz, 2H), 2.38 (s, 3H), 1.99–1.93 (m, 2H), 1.90–1.84 (m,

2H).  $^{13}\text{C}$ NMR (126 MHz,  $\text{CDCl}_3$ )  $\delta$  170.0, 138.1, 137.2, 130.5, 128.1, 127.7, 124.0, 49.6, 46.1, 26.4, 24.5, 21.4.

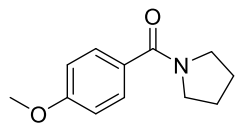

6j (CAS: 69838-98-8).  $^1\text{H}$ NMR (500 MHz,  $\text{CDCl}_3$ )  $\delta$  7.56–7.49 (m, 2H), 6.94–6.88

(m, 2H), 3.84 (s, 3H), 3.64 (t,  $J = 7.0$  Hz, 2H), 3.49 (t,  $J = 6.6$  Hz, 2H), 1.98–1.92

(m, 2H), 1.91–1.86 (m, 2H).  $^{13}\text{C}$ NMR (126 MHz,  $\text{CDCl}_3$ )  $\delta$  169.5, 160.8, 129.4,

129.2, 113.4, 55.3, 49.8, 46.4, 26.5, 24.5.

## 6. Mechanism studies

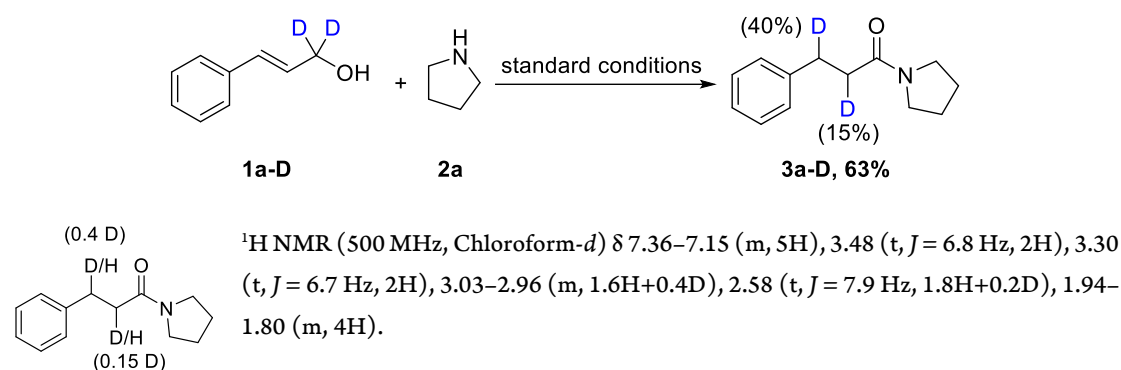

In order to determine the source and transfer route of hydrogen during the reaction, an isotopic labeling experiment was carried out. When the deuterated cinnamyl alcohol **1a-D** was reacted with pyrrolidine **2a** under standard reaction conditions, the deuteration was found in the corresponding product **3a-D**, and the deuterated amide was obtained with an isolated yield of 63%. The  $^1\text{H NMR}$  analysis of **3a-D** indicated that deuterium hydrogen was inserted at C1 and C2 respectively. These studies showed that the hydrogen atoms on methylene of allylic alcohol participate in the reduction of unsaturated double bond.

In addition, hydrogen gas signal was detected by gas chromatography after the end of the reaction (Figure S1), suggesting a dehydrogenative process involved in this cross-coupling of alcohols and amines.

Figure S1. Monitoring of hydrogen gas signal.

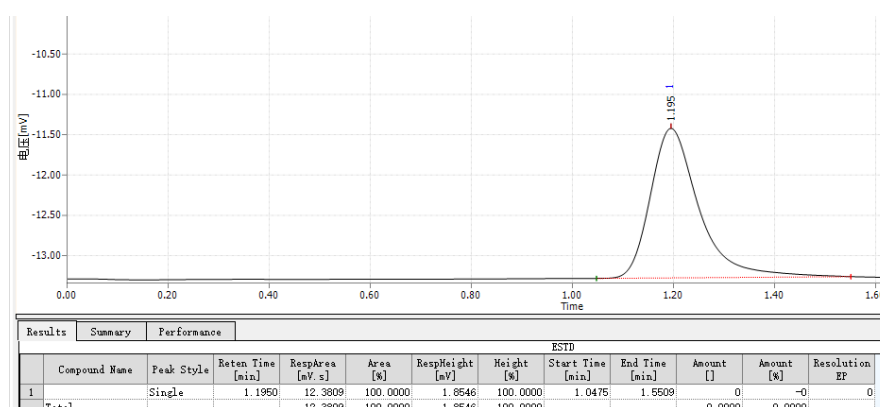

## 7. Supplementary References

- [1] (a) Wang, Y.; Shao, Z.; Zhang, K.; Liu, Q. Manganese-Catalyzed Dual-Deoxygenative Coupling of Primary Alcohols with 2-Arylethanol. *Angew. Chem. Int. Ed.* **2018**, *57*, 15143-15147. (b) Peng, X.; Xu, J.; Li, T.; Chi, Y. R.; Jin, Z. Chemo-selective cross reaction of two enals via carbene-catalyzed dual activation. *Chem. Sci.* **2020**, *11*, 12533-12539. (c) Wang, X.; Liu, F.; Yan, Z.; Qiang, Q.; Huang, W.; Rong, Z.-Q. Redox-Neutral Nickel-Catalyzed Cross-Coupling Reactions of (Homo)allylic Alcohols and Aryltriflates. *ACS Catal.* **2021**, *11*, 7319-7326.



## 8. <sup>1</sup>H NMR, <sup>13</sup>C NMR, and <sup>19</sup>F NMR spectra

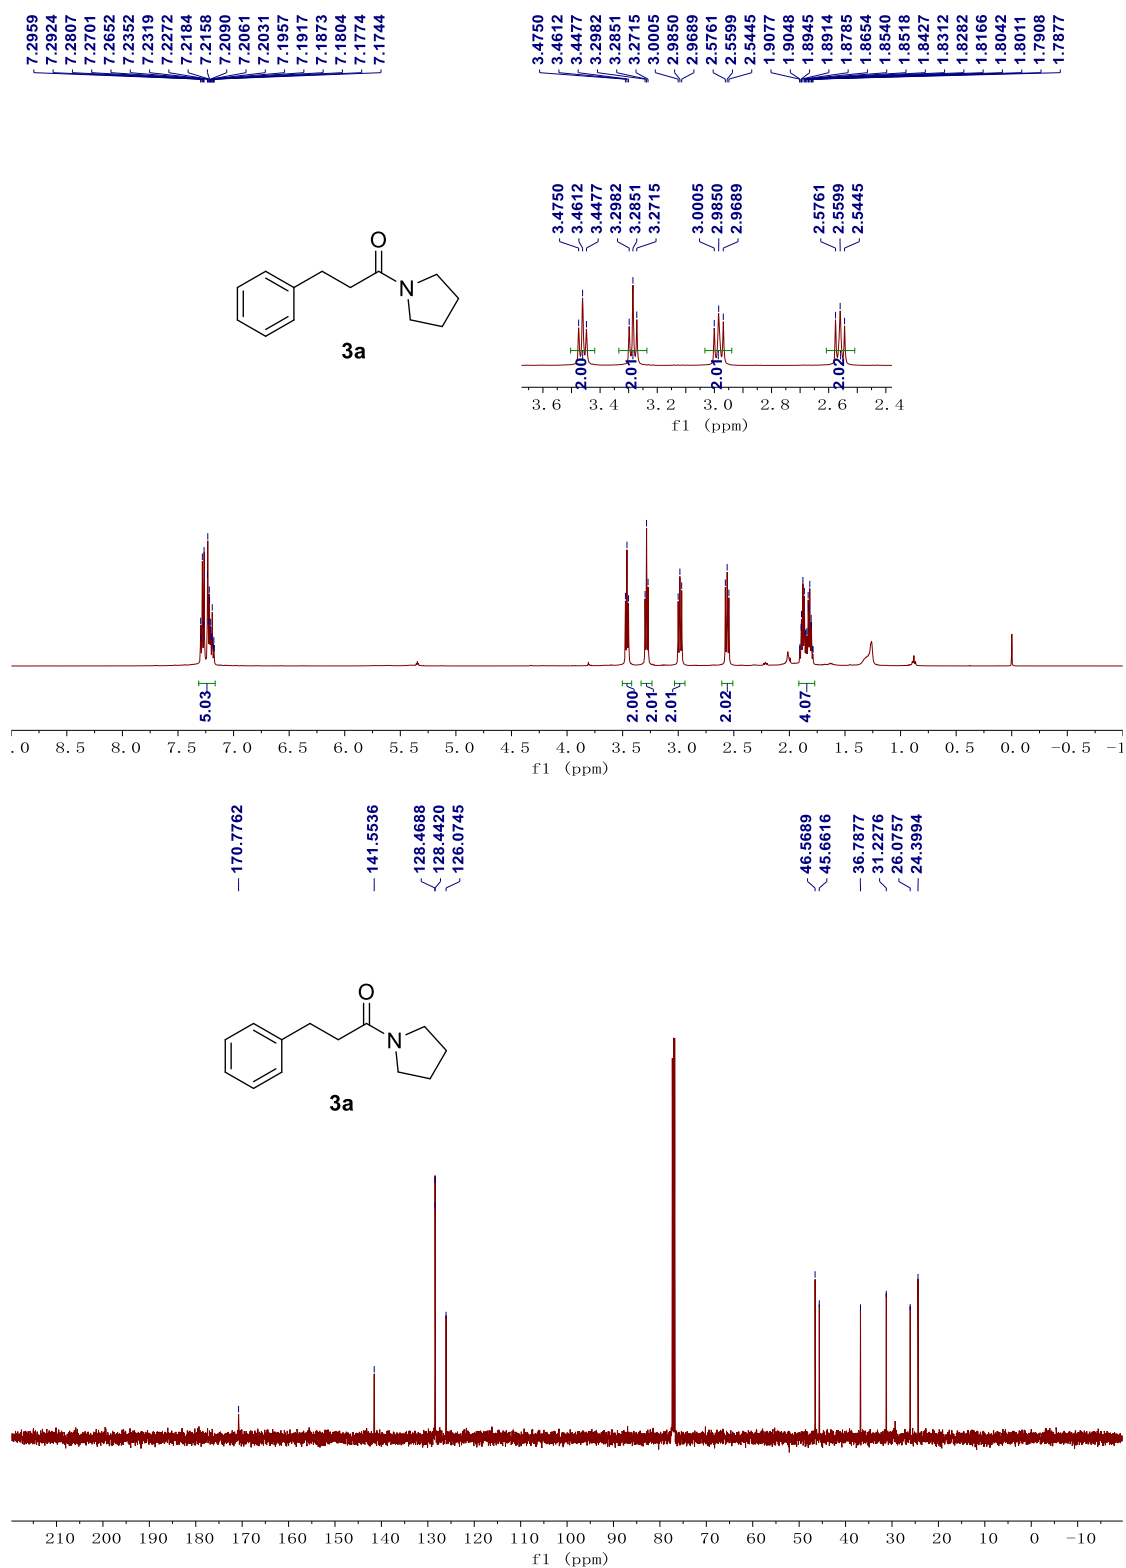

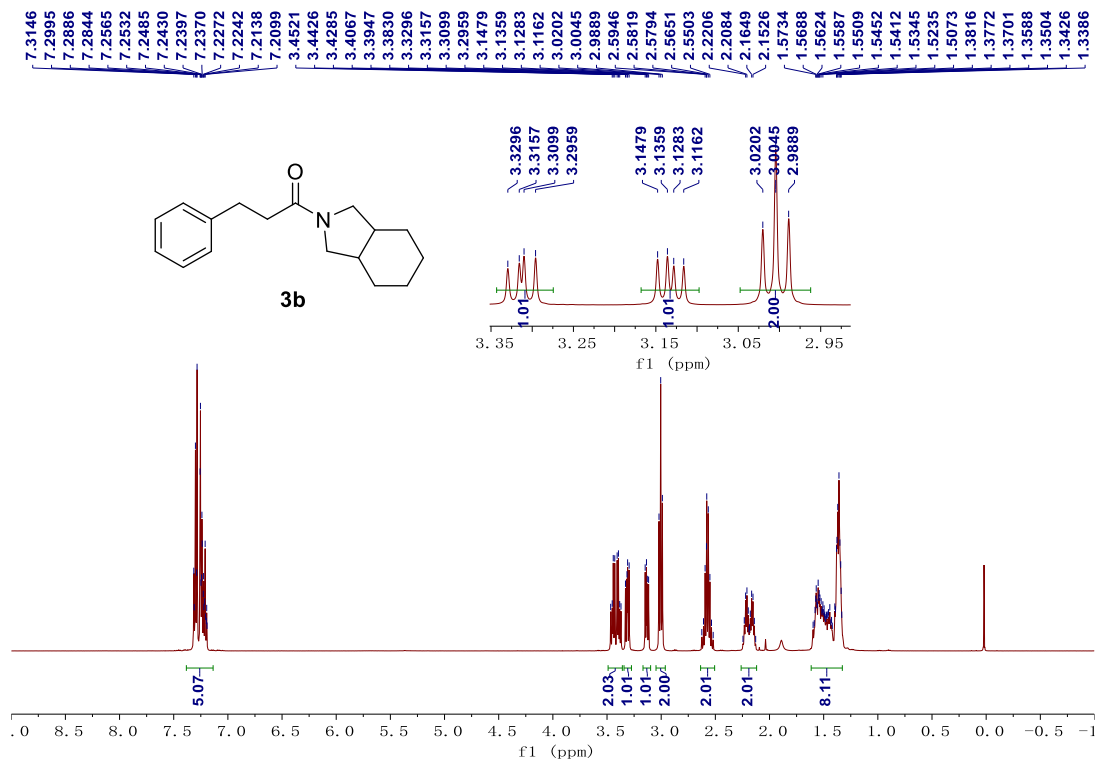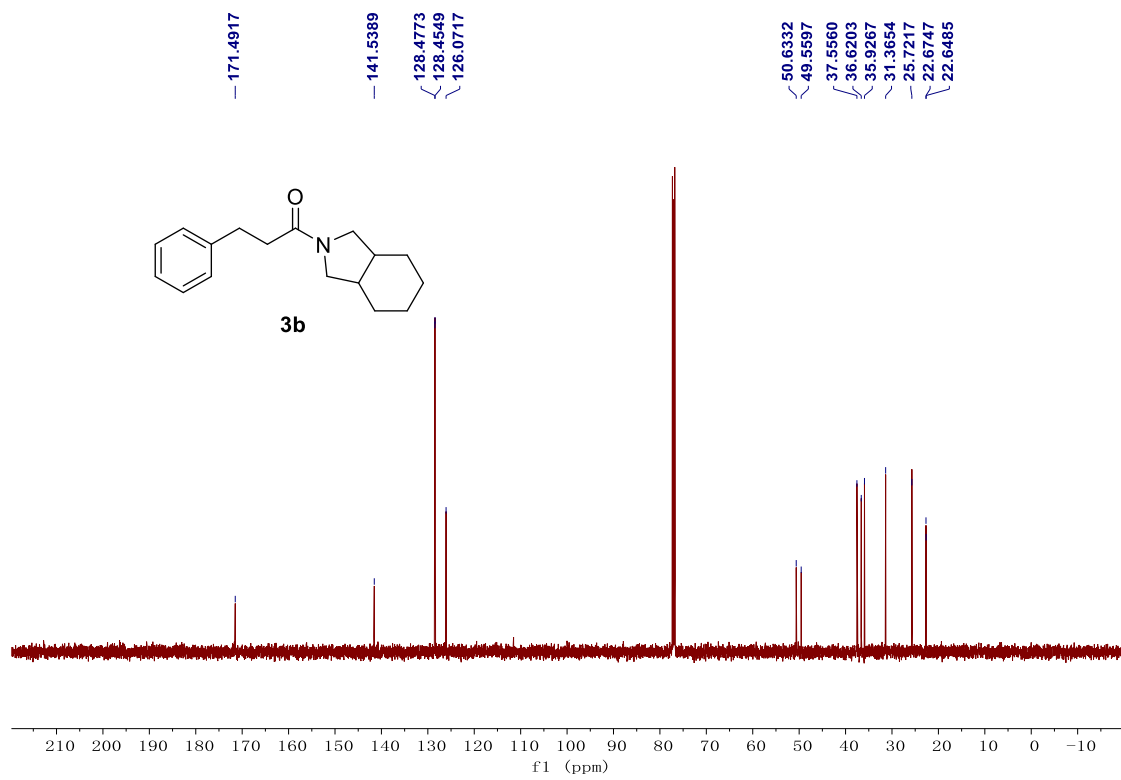

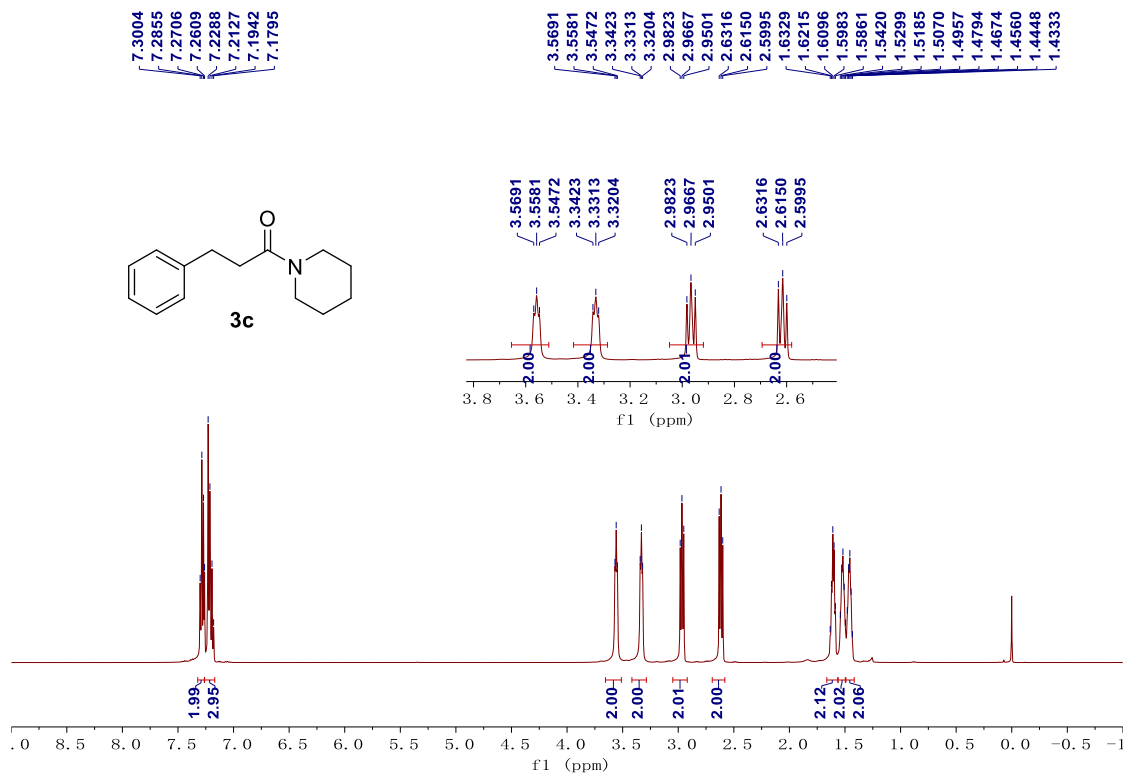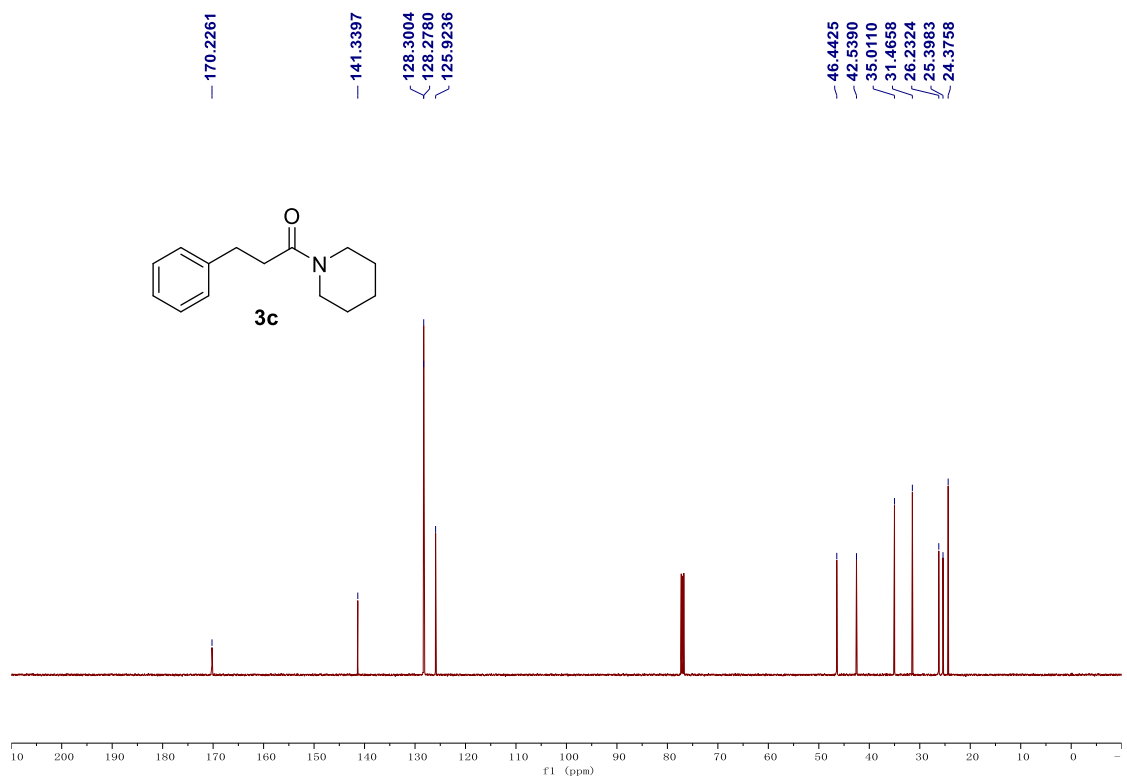

7.3215  
7.3064  
7.2959  
7.2916  
7.2843  
7.2508  
7.2475  
7.2323  
7.2190  
7.2152  
7.2008  
4.6301  
4.6255  
4.6082  
4.6038  
4.5992  
3.7892  
3.7845  
3.7663  
3.7623  
3.7574  
3.0013  
3.0013  
2.9869  
2.9839  
2.9694  
2.9576  
2.9526  
2.9320  
2.9267  
2.9267  
2.6530  
2.6420  
2.6420  
2.6355  
2.6251  
2.6251  
2.6203  
2.6420  
2.6355  
2.6251  
2.5474  
1.6803  
1.6746  
1.6544  
1.6485  
1.6428  
1.6375  
1.6331  
1.6160  
1.6106  
1.6068  
1.5985  
1.5772  
1.0818  
1.0584  
0.9786  
0.9724  
0.9694  
0.9561  
0.9482  
0.9354

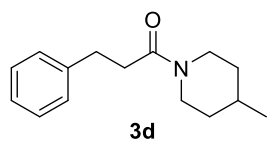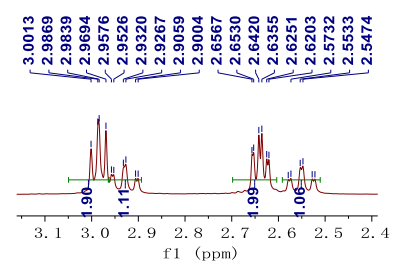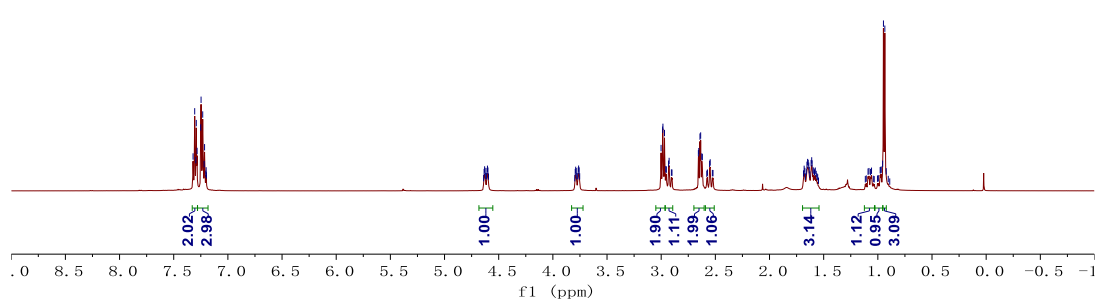

170.4418  
141.5057  
128.4845  
128.4664  
126.1020  
45.9266  
42.1176  
35.2244  
34.5449  
33.7875  
31.6652  
31.0804  
21.7130

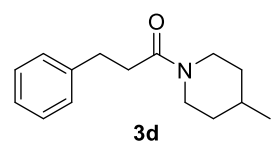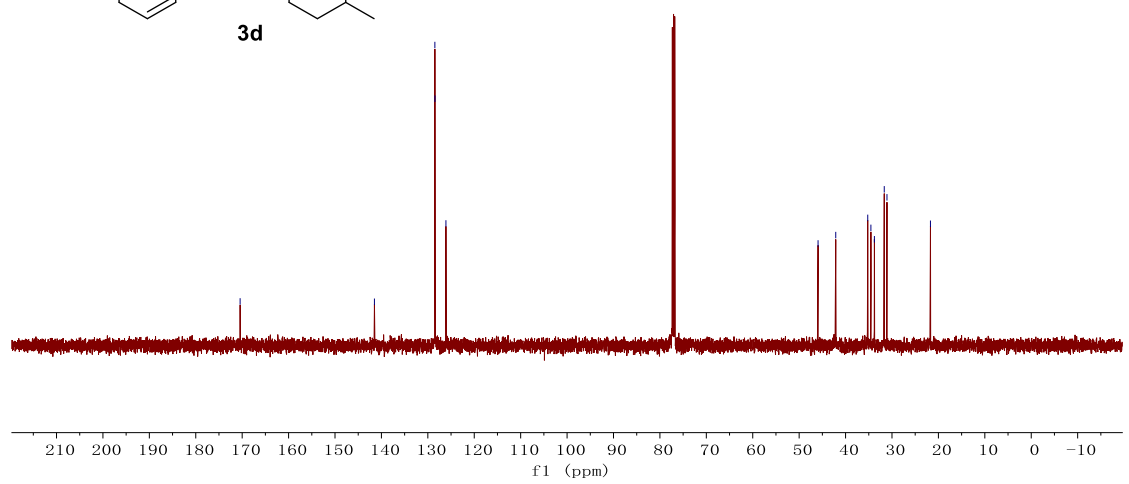

7.2987  
7.2926  
7.2835  
7.2777  
7.2685  
7.2625  
7.2532  
7.2188  
7.2135  
7.2090  
7.2030  
7.1964  
7.1832  
7.1803  
7.1224  
7.1192  
7.1054  
4.6371  
4.6152  
4.6107  
3.7657  
3.7431  
3.7388  
2.9763  
2.9725  
2.9584  
2.9427  
2.8510  
2.8453  
2.6265  
2.6169  
2.6113  
2.6005  
2.5952  
2.5847  
2.5301  
2.5164  
2.5017  
2.4966  
2.4824  
2.4754  
2.4698  
2.4557  
2.4496  
1.7158  
1.7082  
1.7011  
1.6936  
1.6870  
1.6822  
1.6763  
1.6618  
1.6559  
1.6498  
1.6080  
1.5872  
1.5813

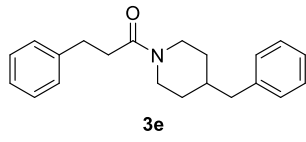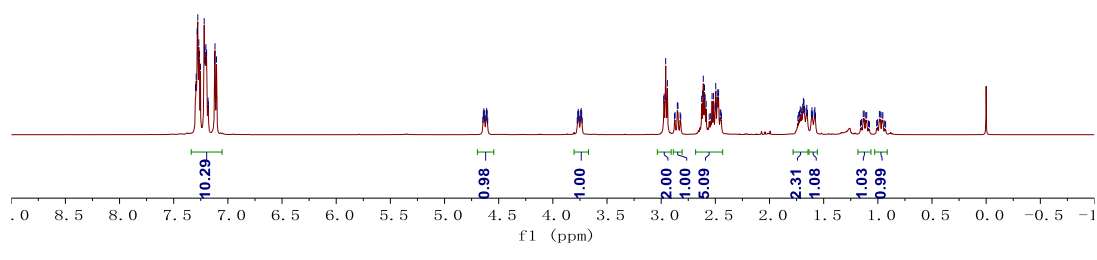

170.4476  
141.4729  
139.9812  
129.0838  
128.4989  
128.3090  
126.1310  
126.0577  
77.3056  
77.0538  
76.7995  
45.8816  
42.9725  
42.0575  
38.2363  
35.1876  
32.4345  
31.8108  
31.6786

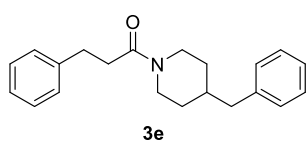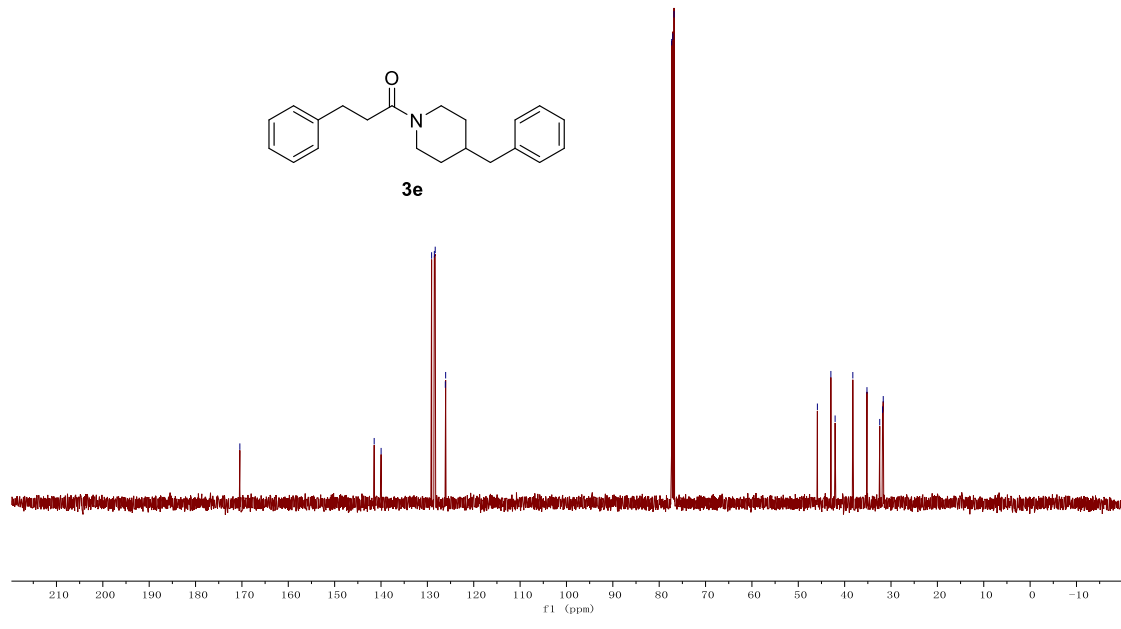

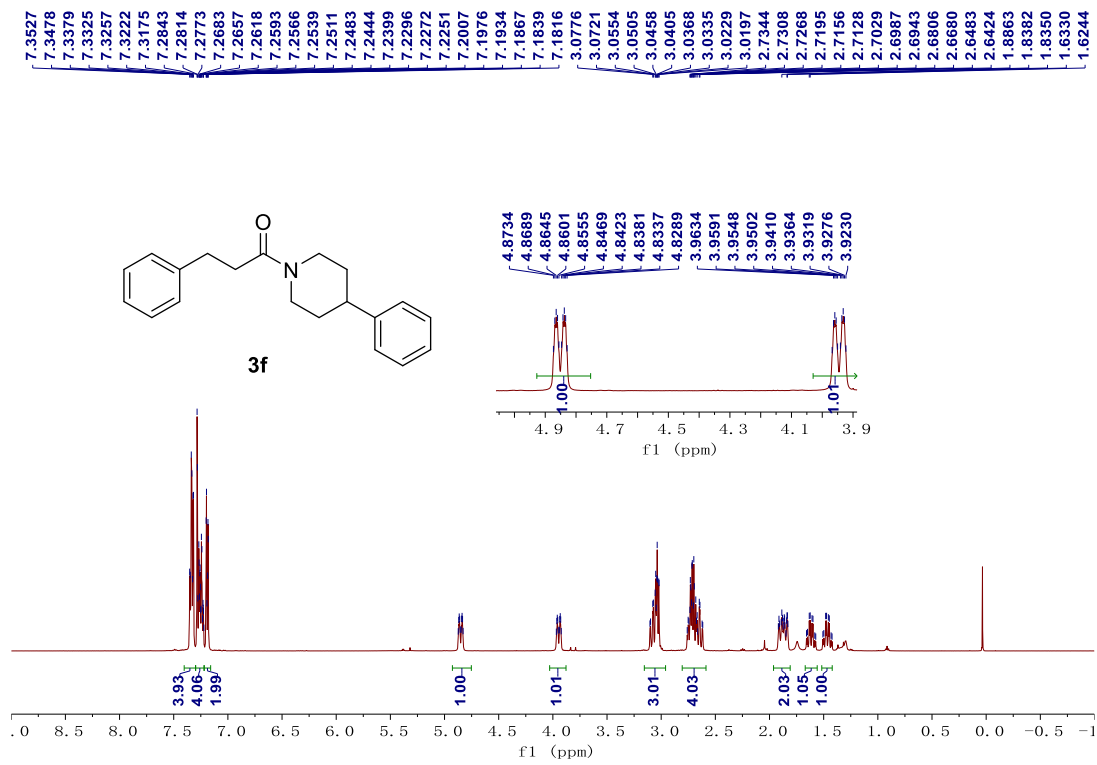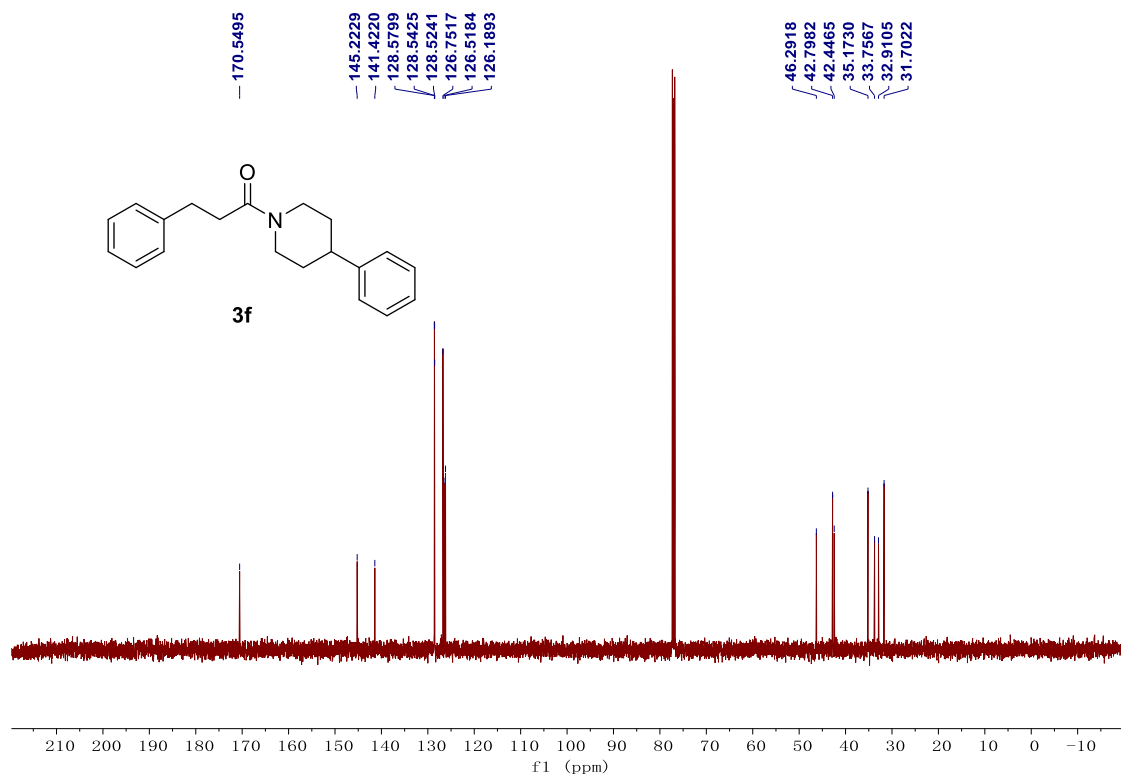

<sup>1</sup>H NMR (500 MHz, CDCl<sub>3</sub>) (amide rotamers 1.3:1)

7.3743  
7.3401  
7.3249  
7.3099  
7.2951  
7.2835  
7.2755  
7.2677  
7.2605  
7.2515  
7.2371  
7.2251  
7.2194  
7.2120  
7.2063  
7.1920  
7.1809  
7.1765  
7.1555  
7.1410  
7.0661  
7.0552  
7.0491  
4.7817  
4.5665  
3.8865  
3.8745  
3.8626  
3.6432  
3.6314  
3.6195  
3.0753  
3.0644  
3.0603  
3.0498  
3.0436  
3.0326  
2.8889  
2.8769  
2.8650  
2.8556  
2.8437  
2.8318  
2.7723  
2.7598  
2.7551  
2.7426  
2.7281

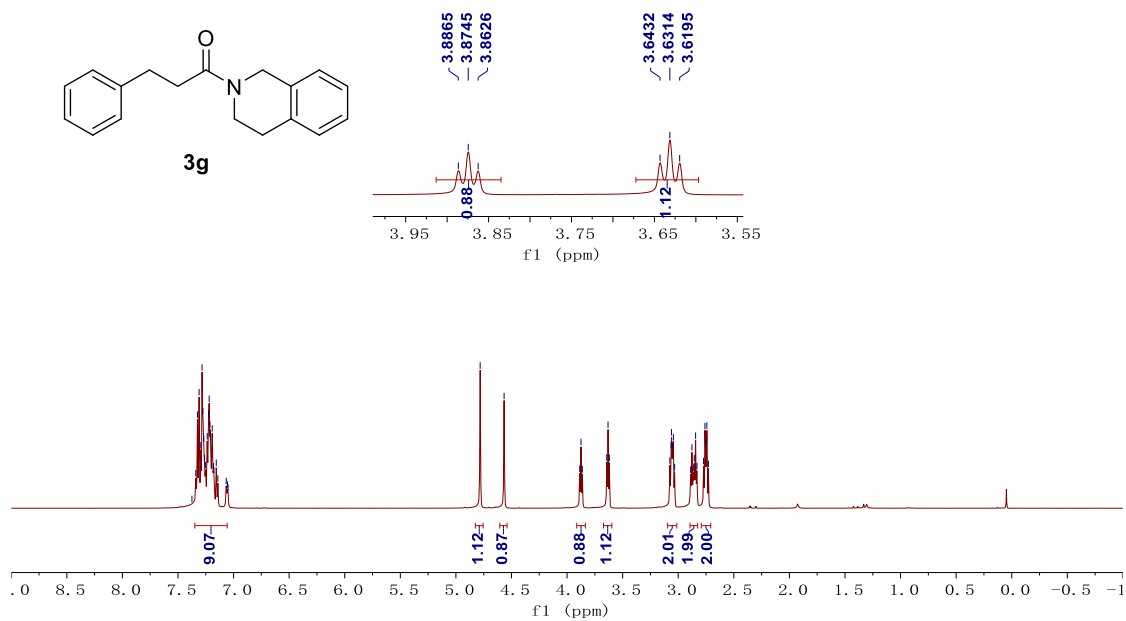

<sup>1</sup>H NMR (500 MHz, DMSO-*d*<sub>6</sub>, 60 °C)

7.2817  
7.2645  
7.2555  
7.2027  
7.1723  
7.1658  
7.1580  
7.1498  
4.6211  
3.6711  
2.9048  
2.8897  
2.8740  
2.7997  
2.7394  
2.7238  
2.7087

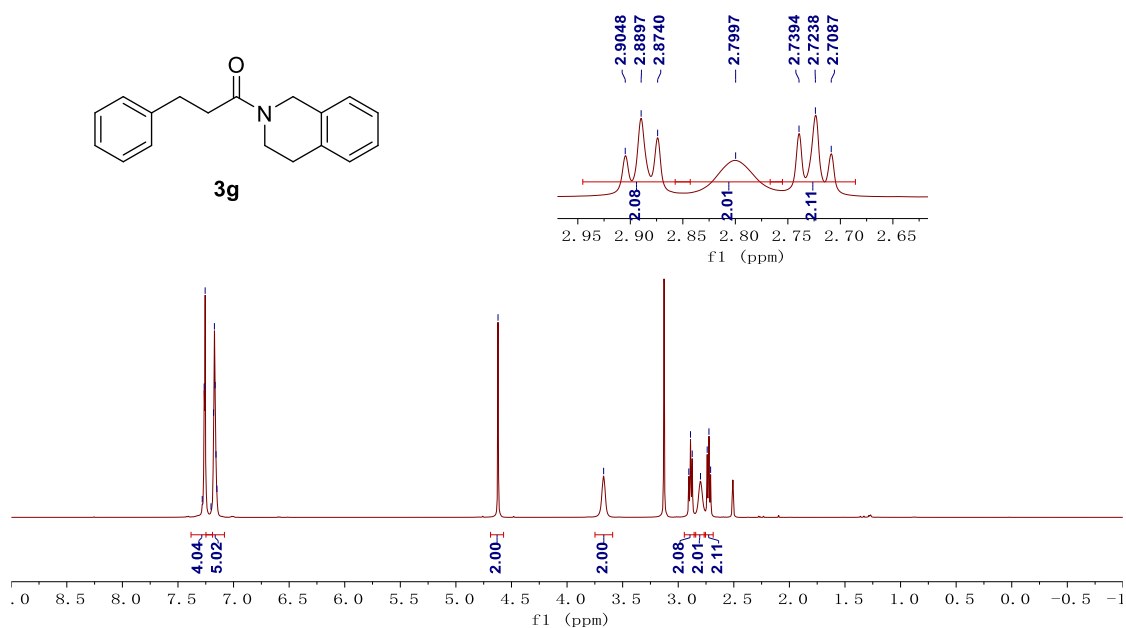

171.1709  
171.0473  
141.3913  
141.3699  
135.1366  
134.1337  
133.6149  
132.5705  
128.9453  
128.5572  
128.5283  
128.4773  
128.4558  
128.2740  
126.9123  
126.7151  
126.6202  
126.5548  
126.3432  
126.2107  
126.1898  
126.0591

47.3002  
44.3018  
43.2067  
39.7356  
35.8262  
35.5483  
31.4742  
31.4108  
29.4641  
28.5590

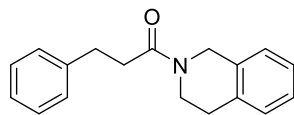

3g

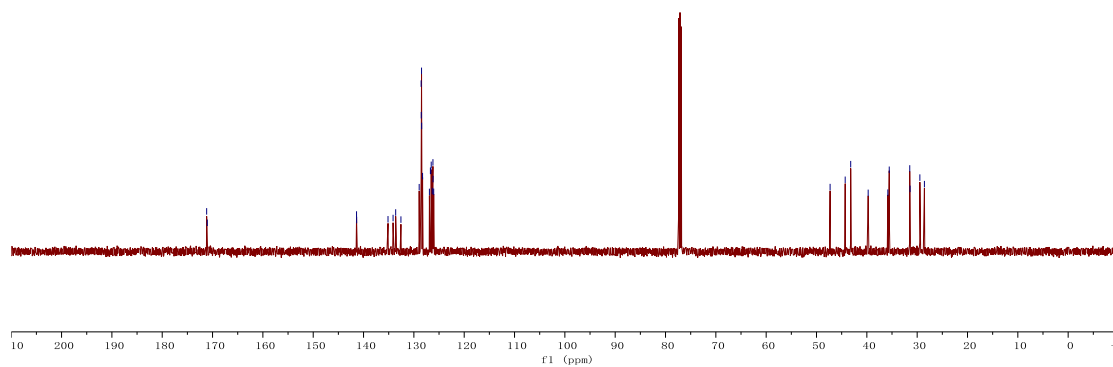



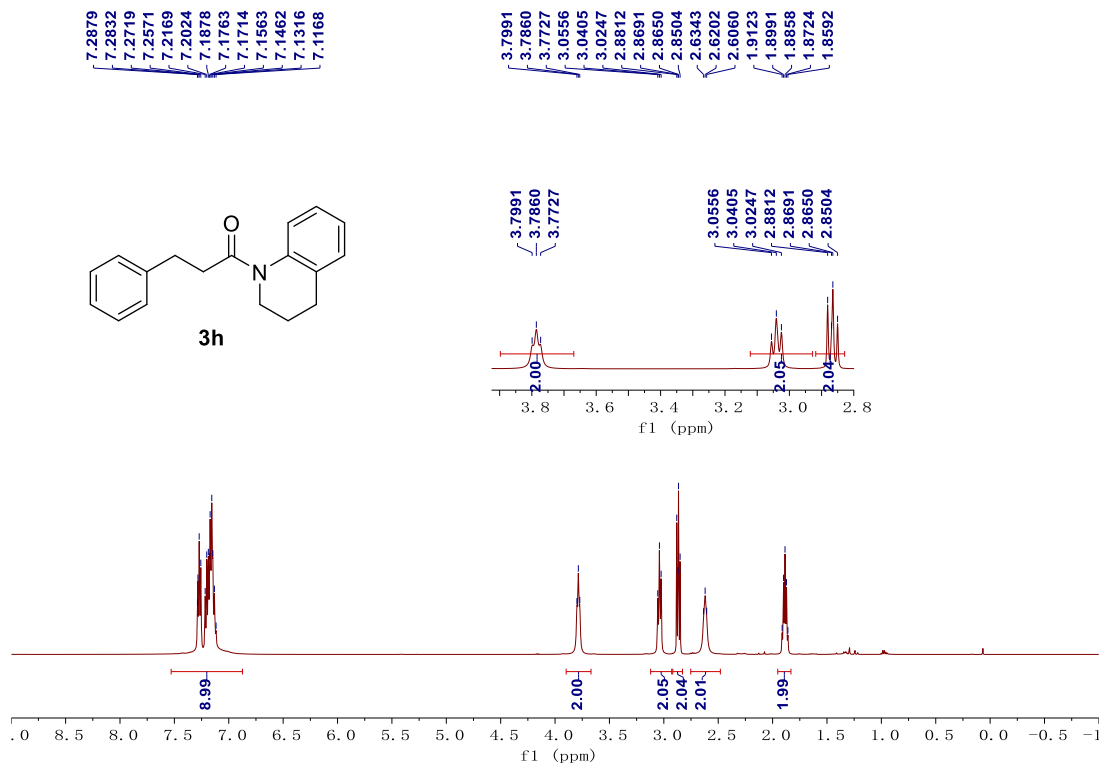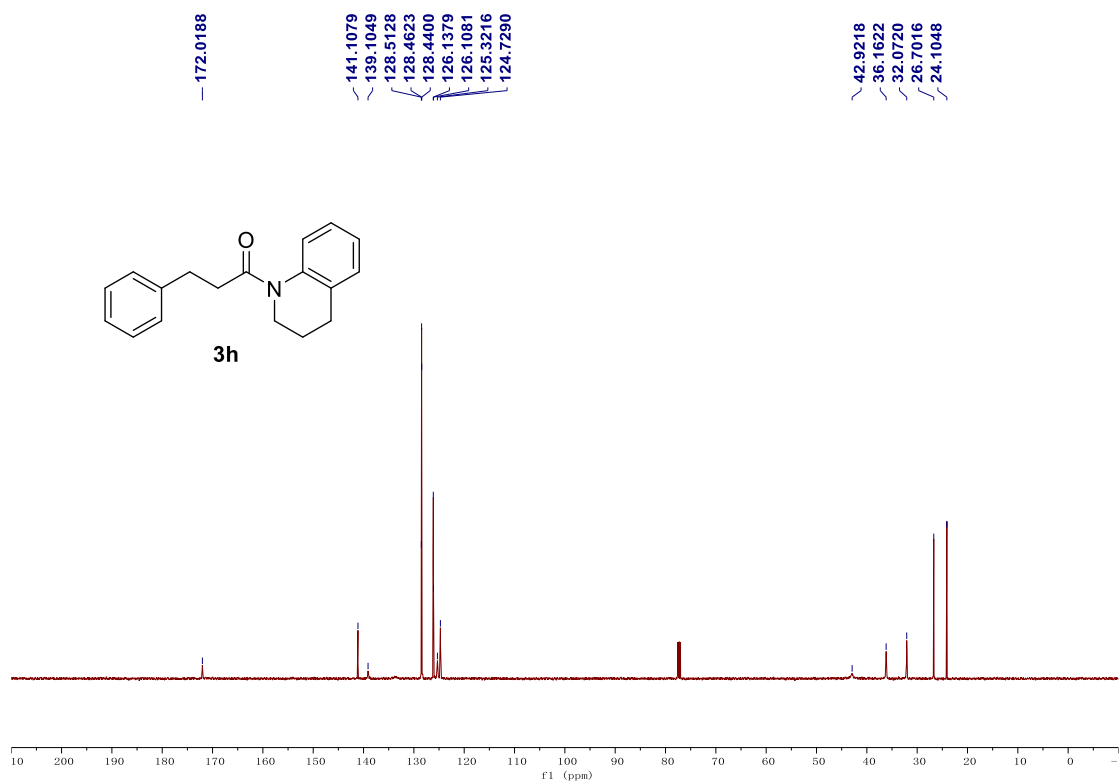

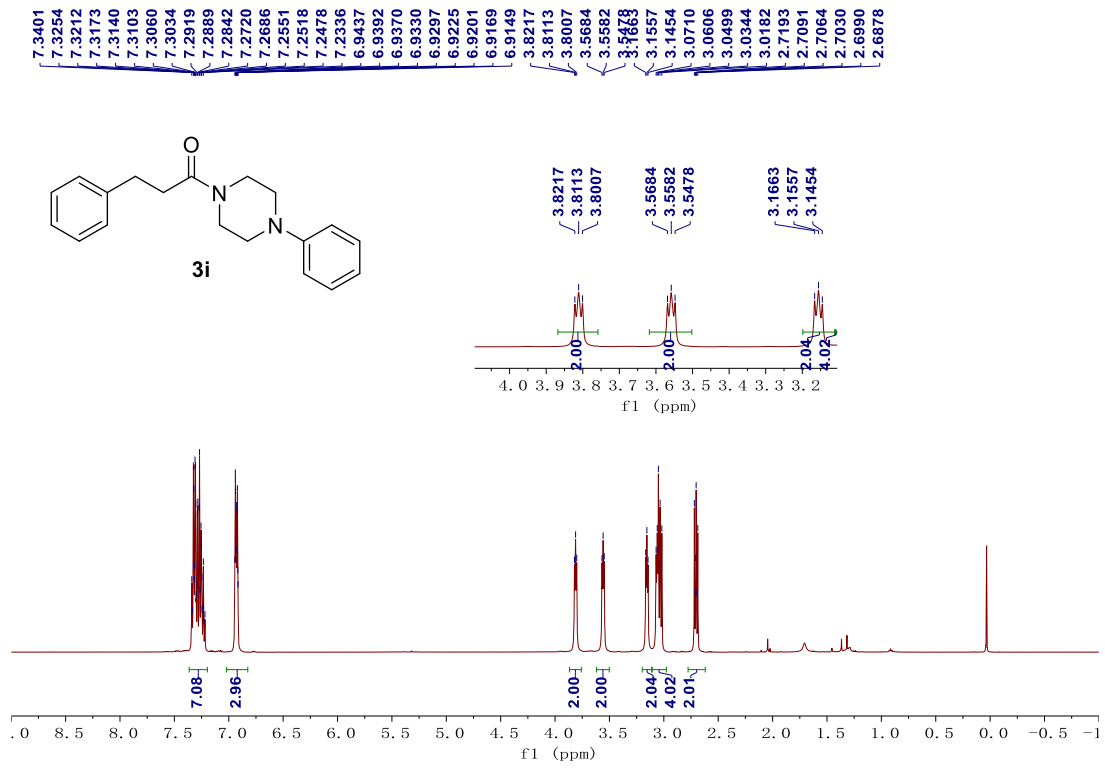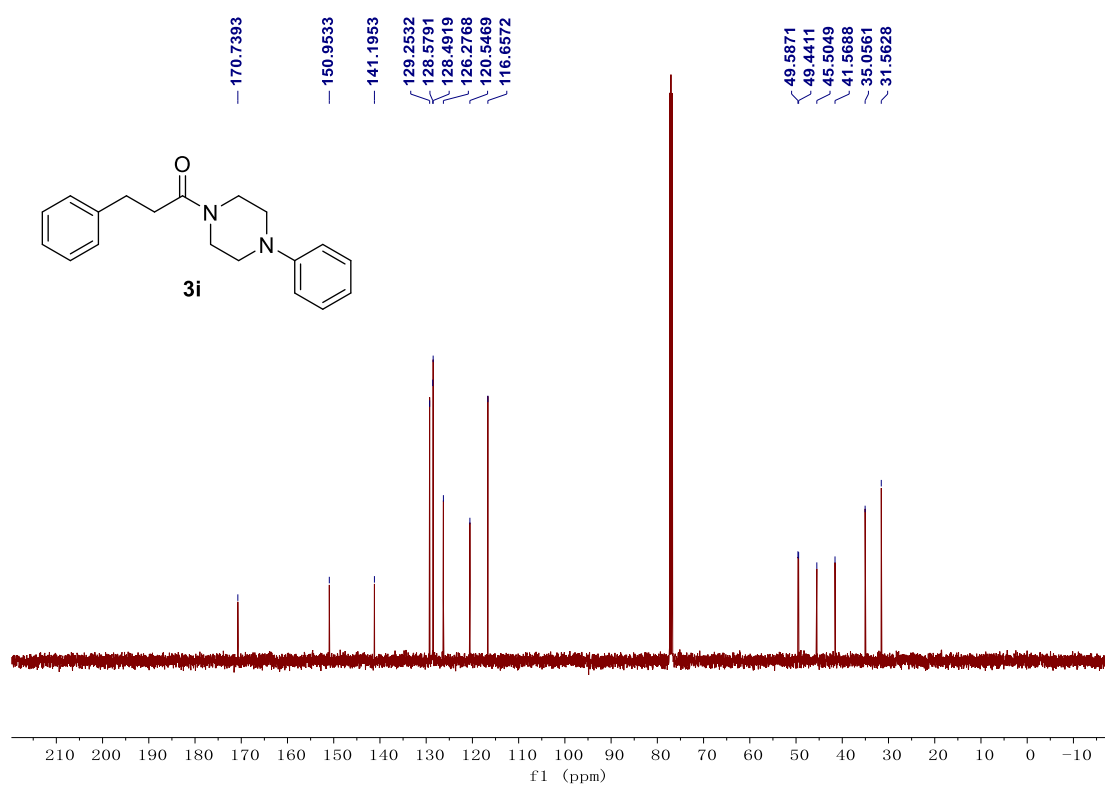

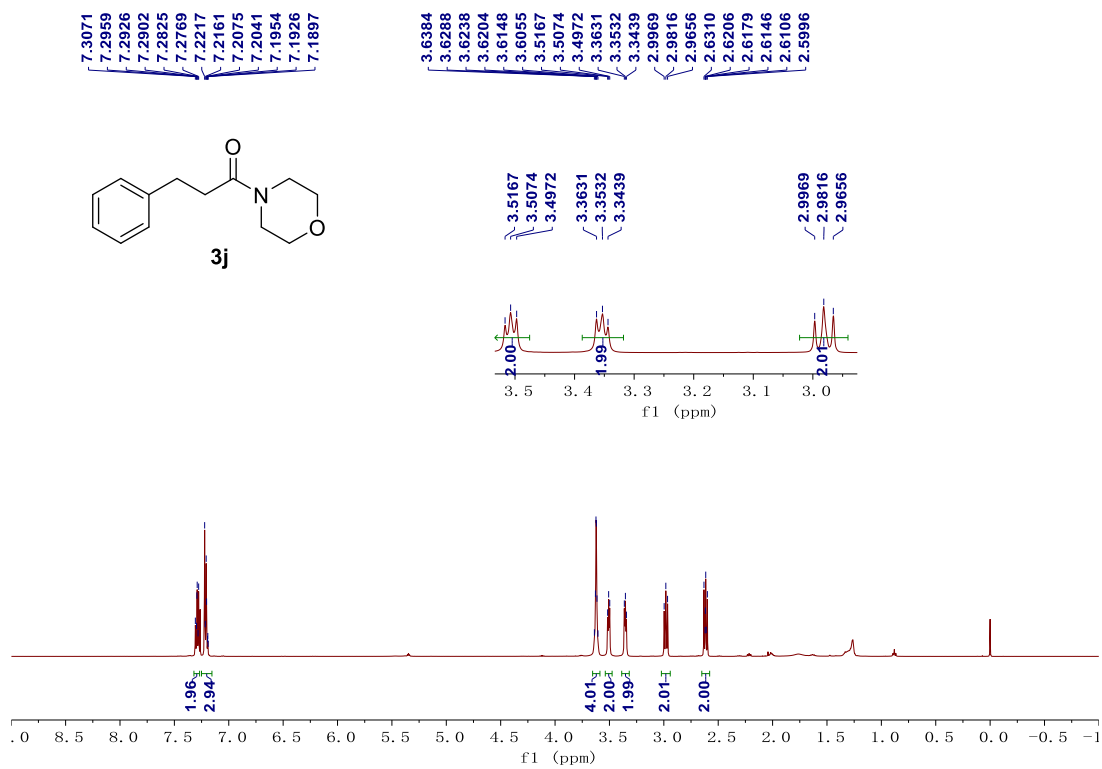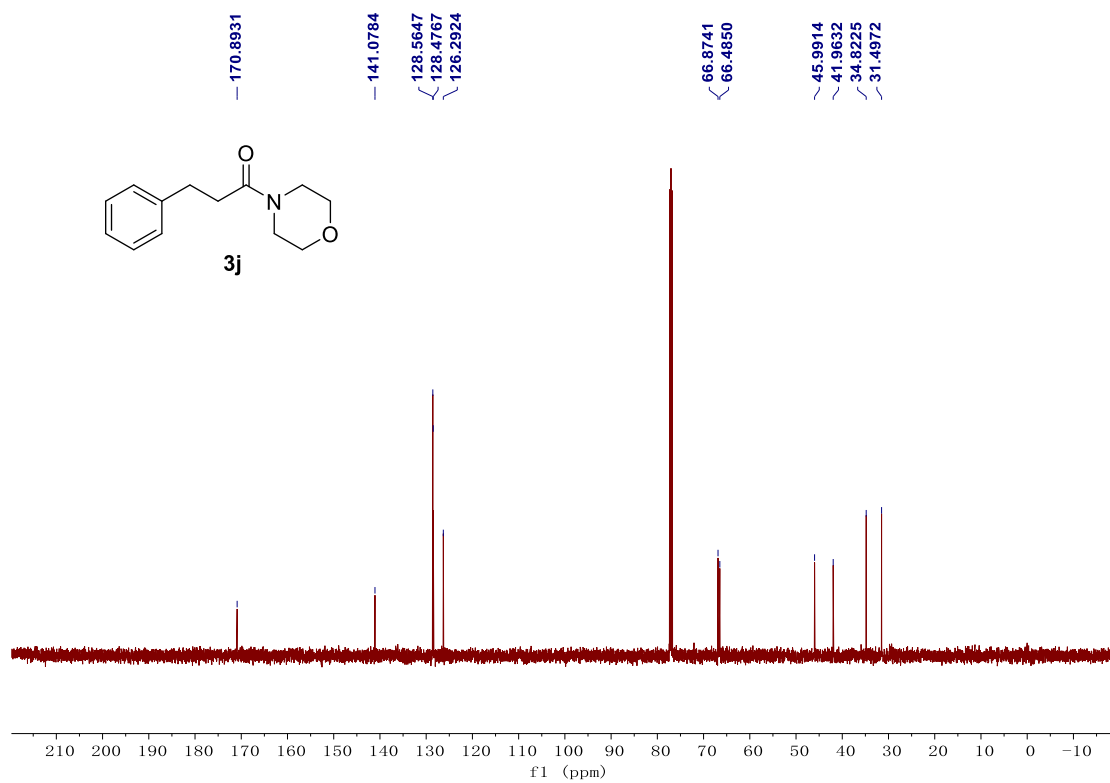

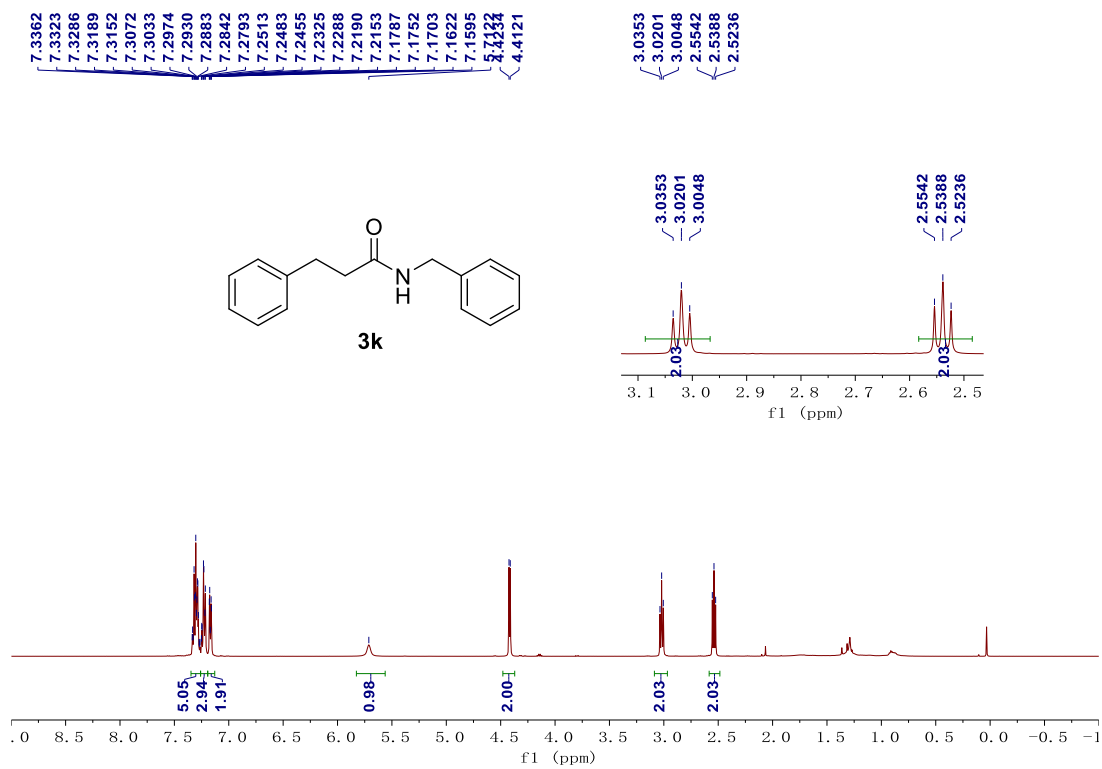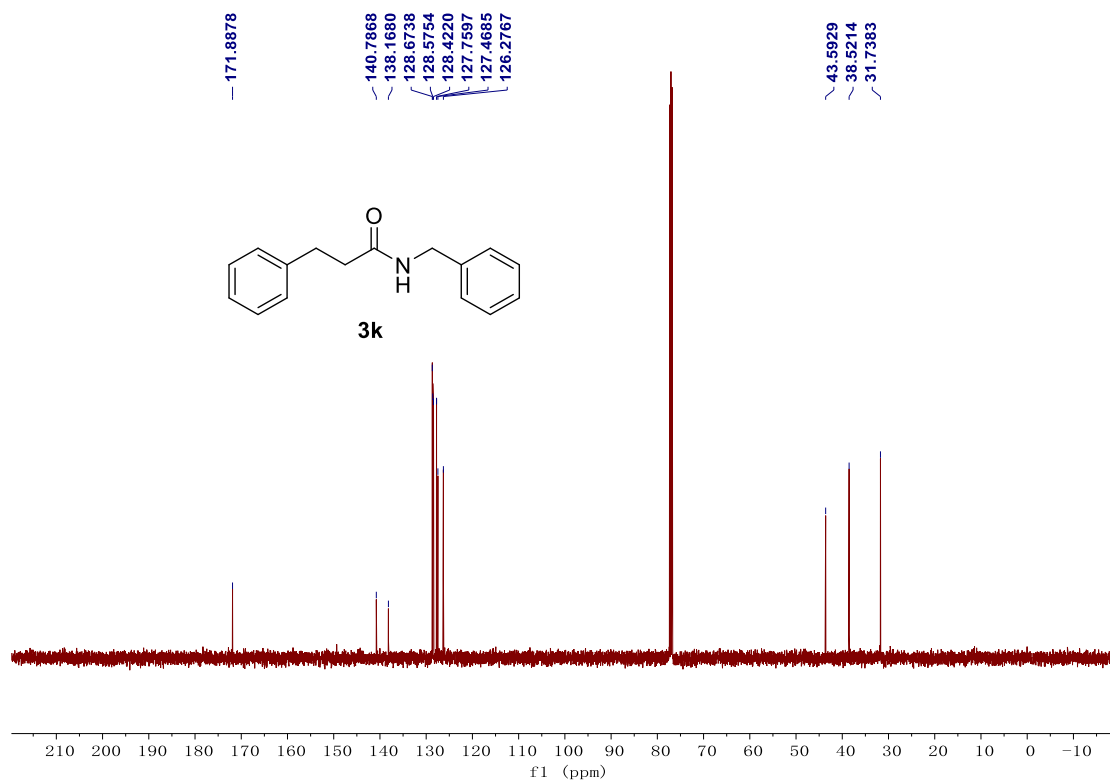

<sup>1</sup>H NMR (500 MHz, CDCl<sub>3</sub>) (amide rotamers 1.4:1)

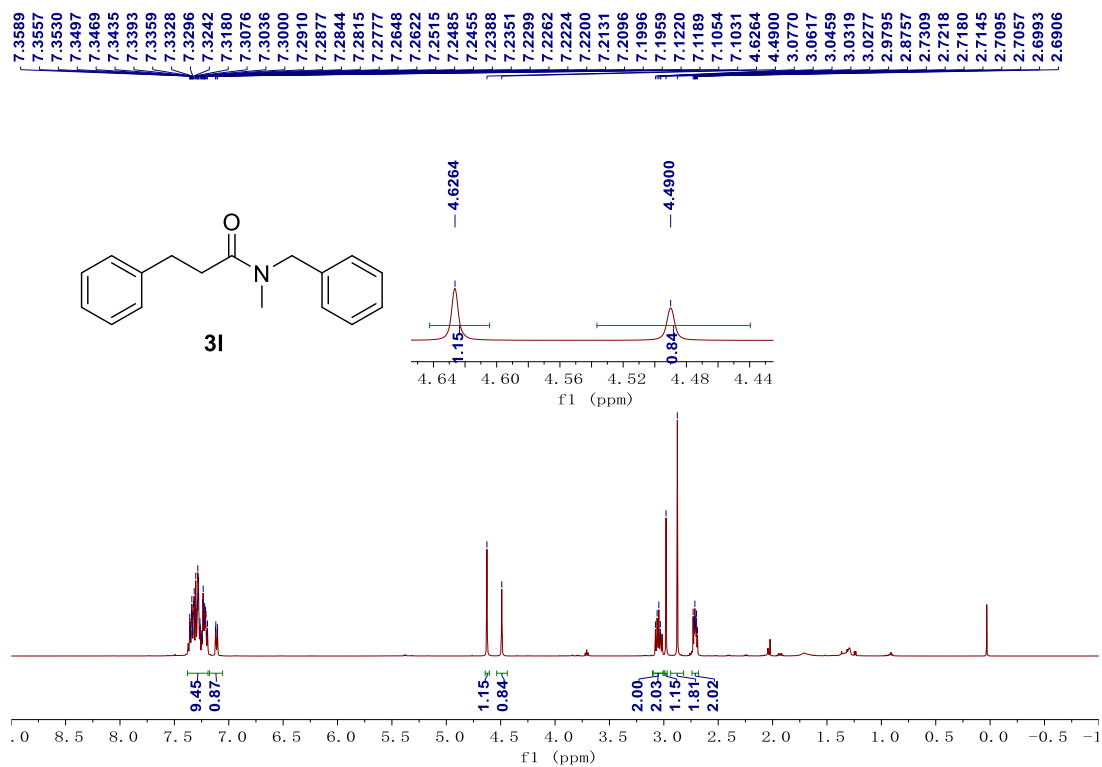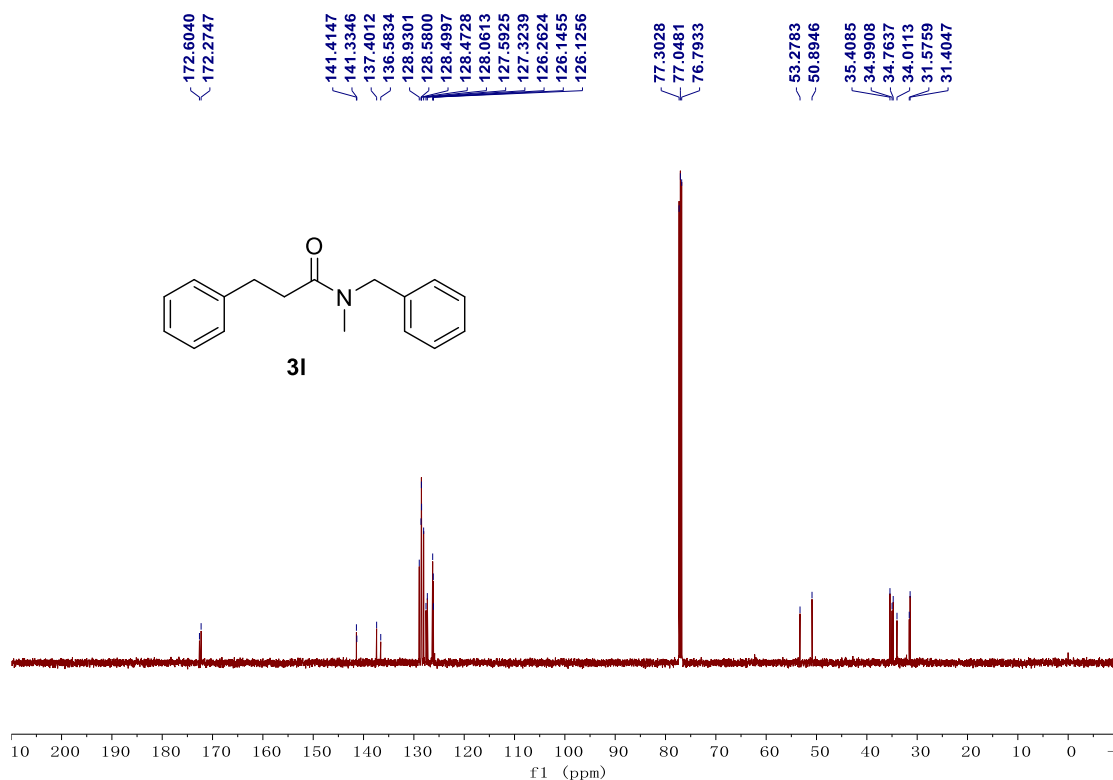

<sup>1</sup>H NMR (500 MHz, DMSO-d<sub>6</sub>, 60 °C)

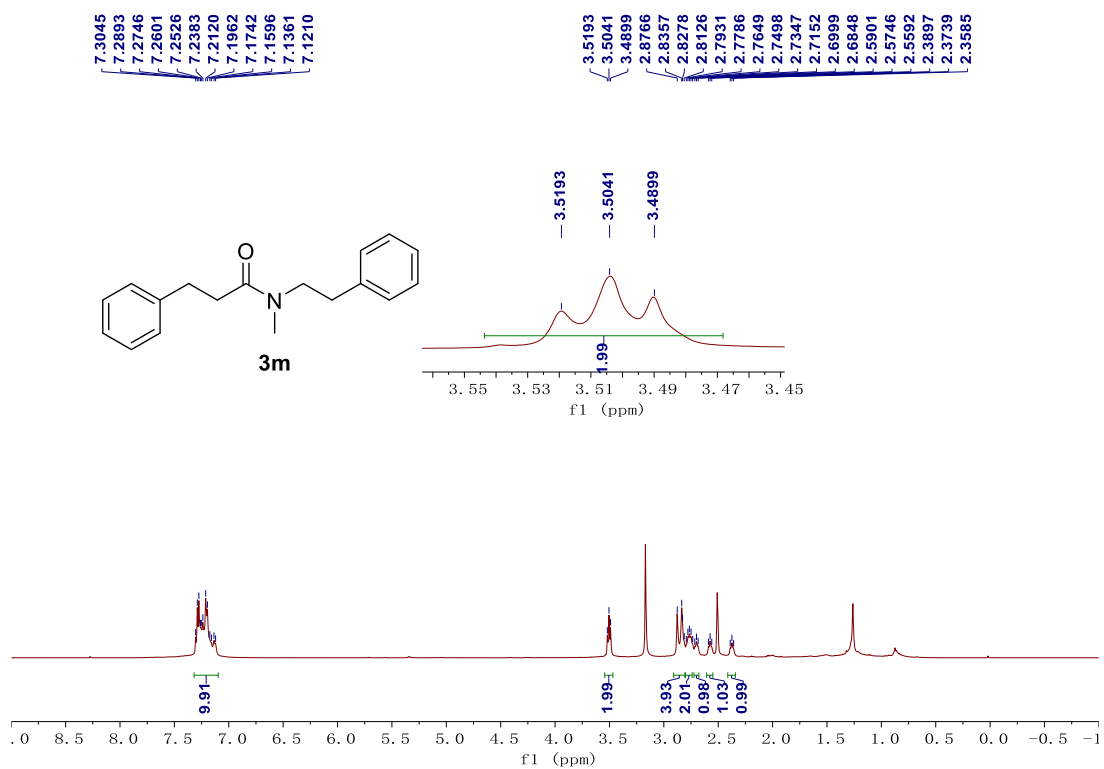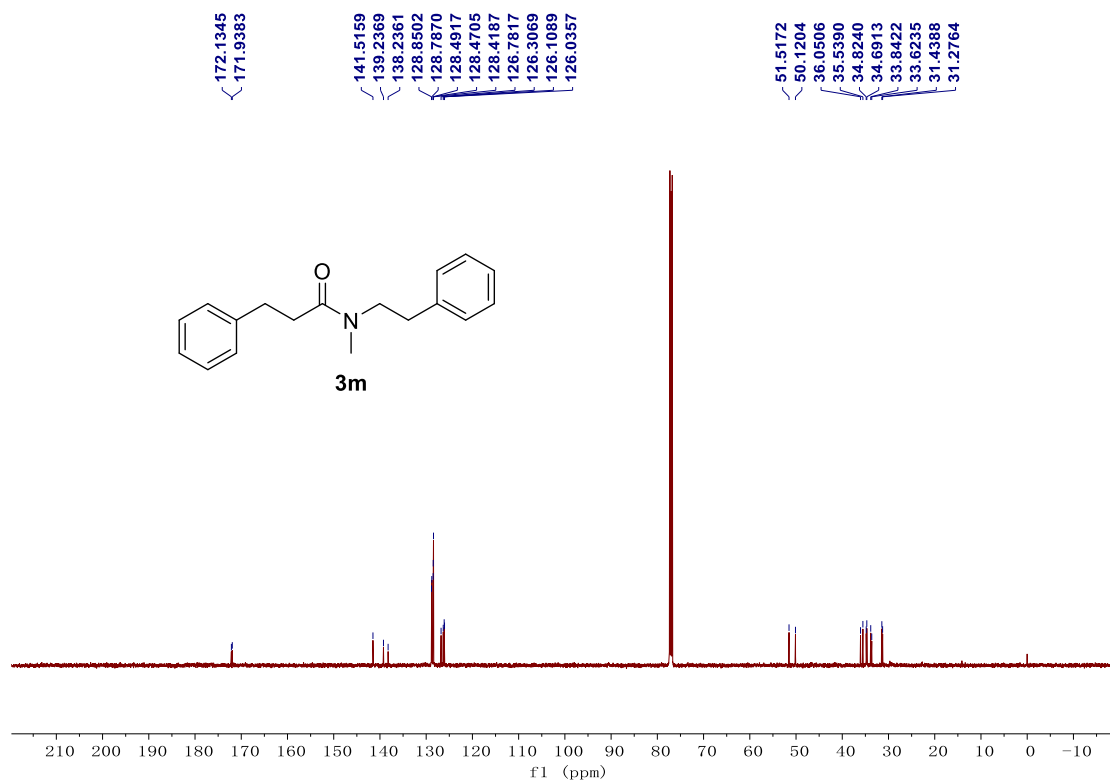

<sup>1</sup>H NMR (500 MHz, CDCl<sub>3</sub>) (amide rotamers 1.6:1)

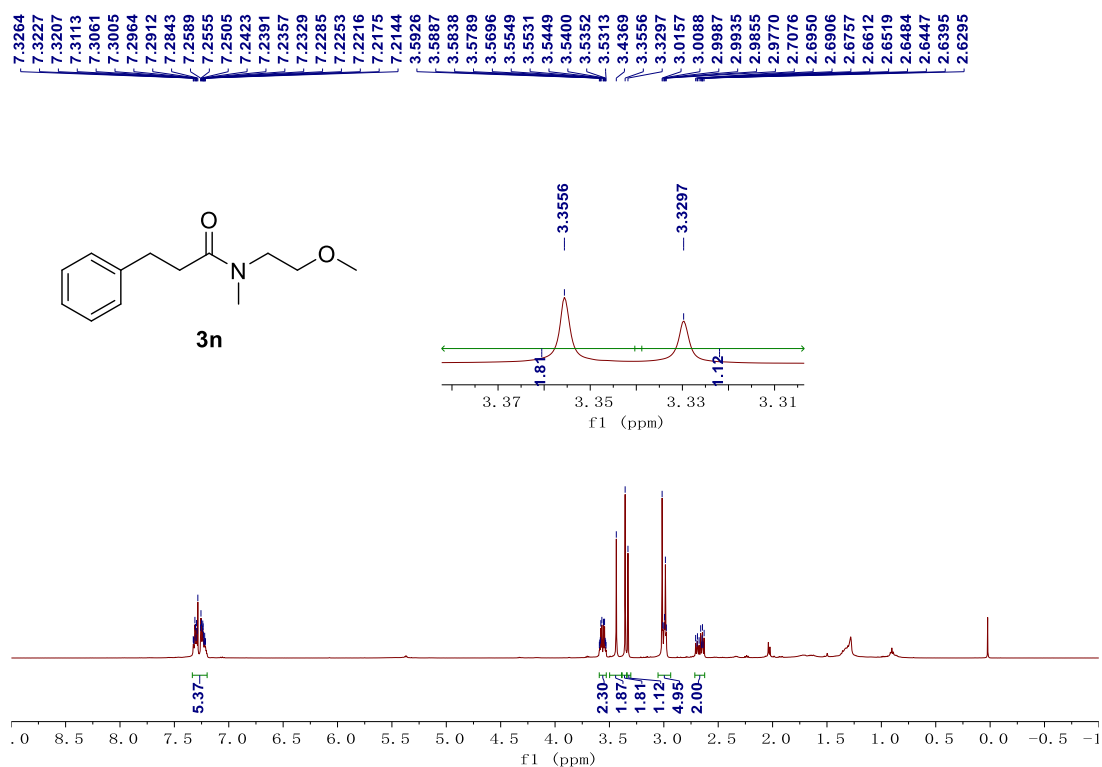

<sup>1</sup>H NMR (500 MHz, DMSO-d<sub>6</sub>, 60 °C)

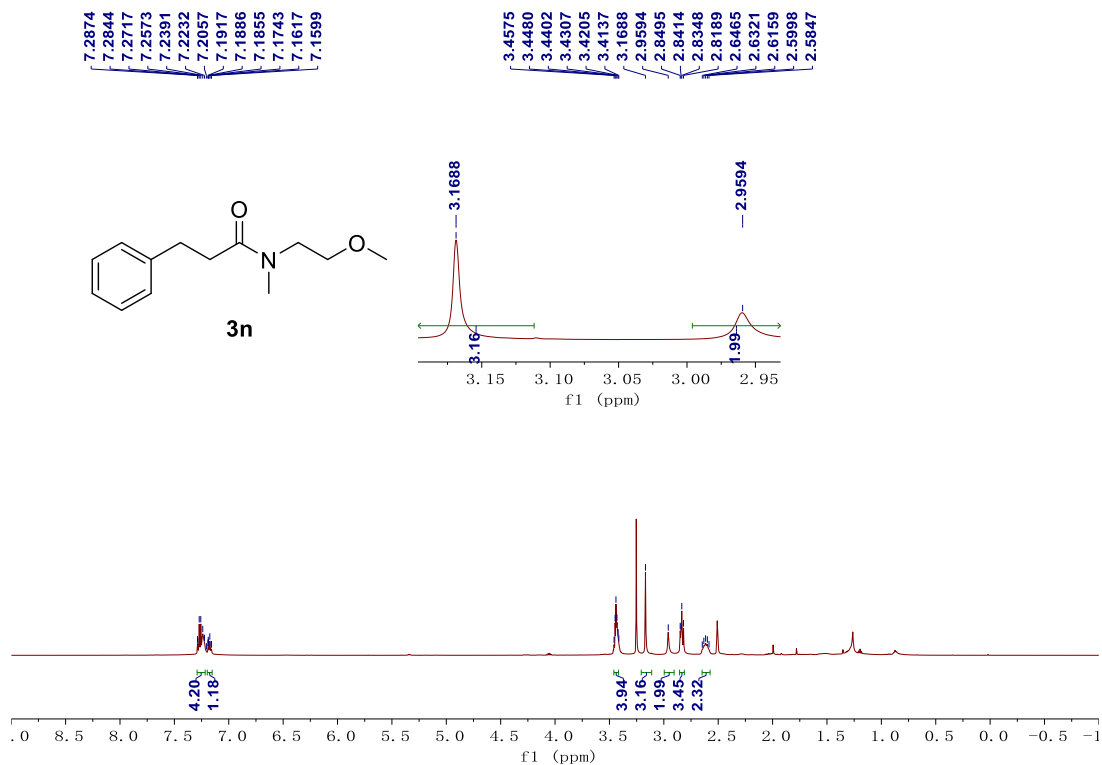

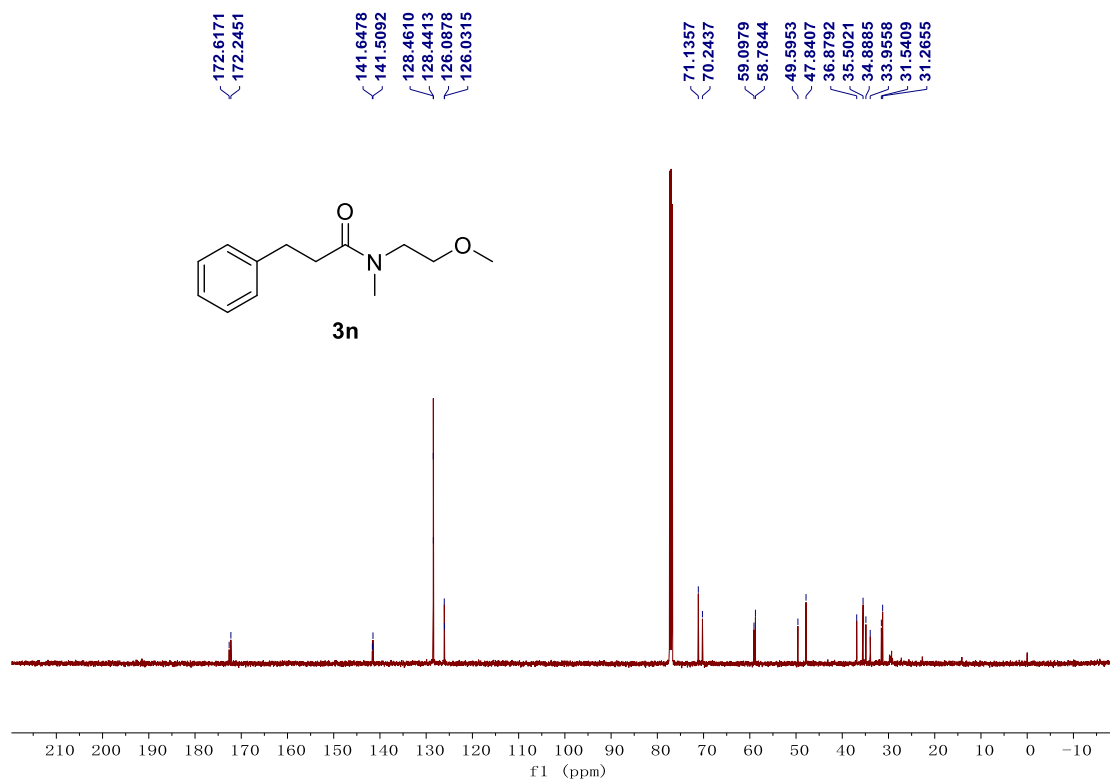



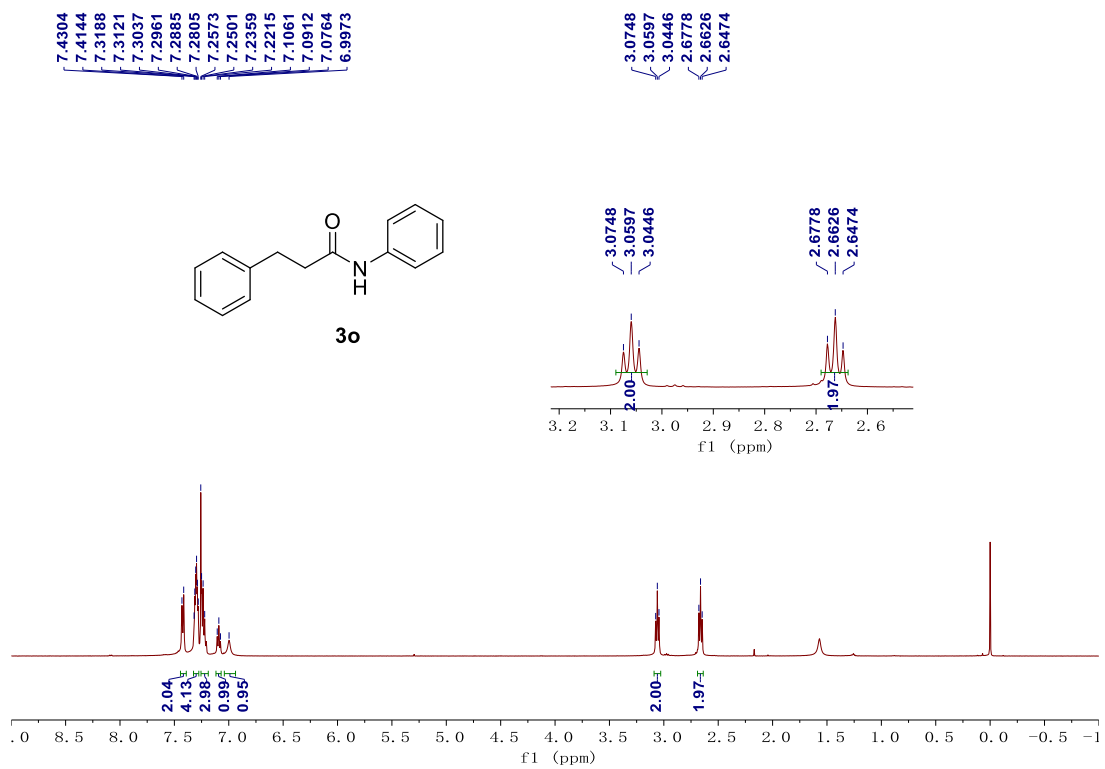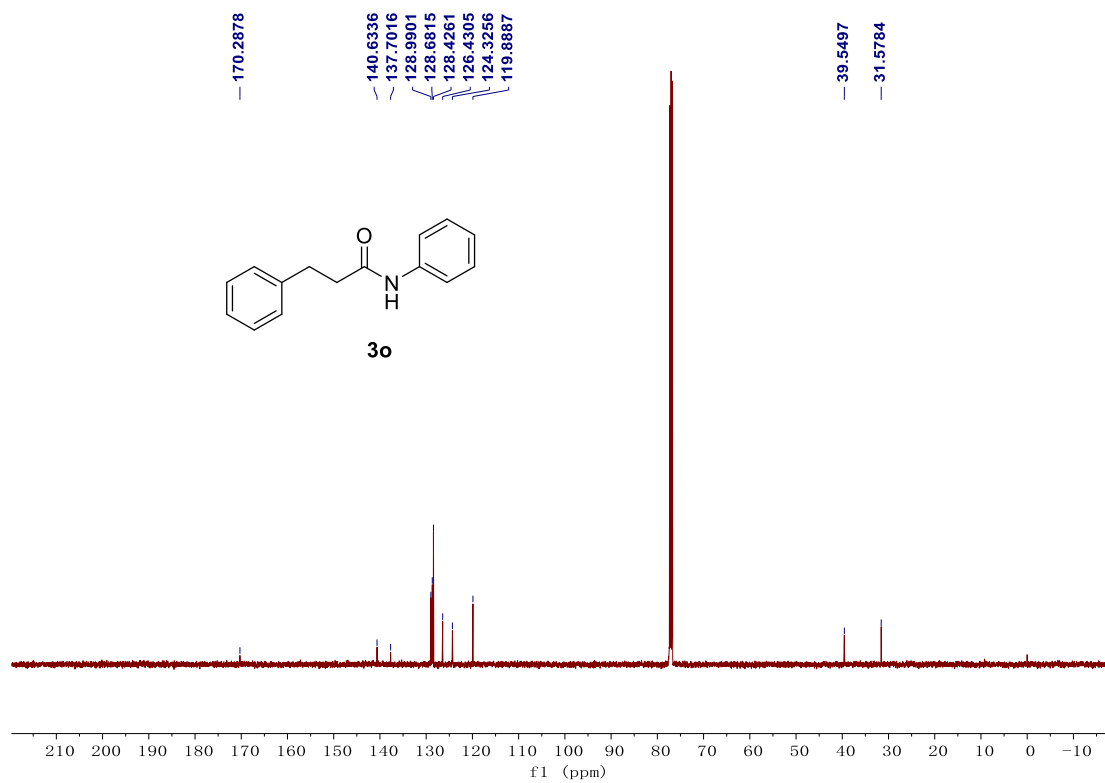

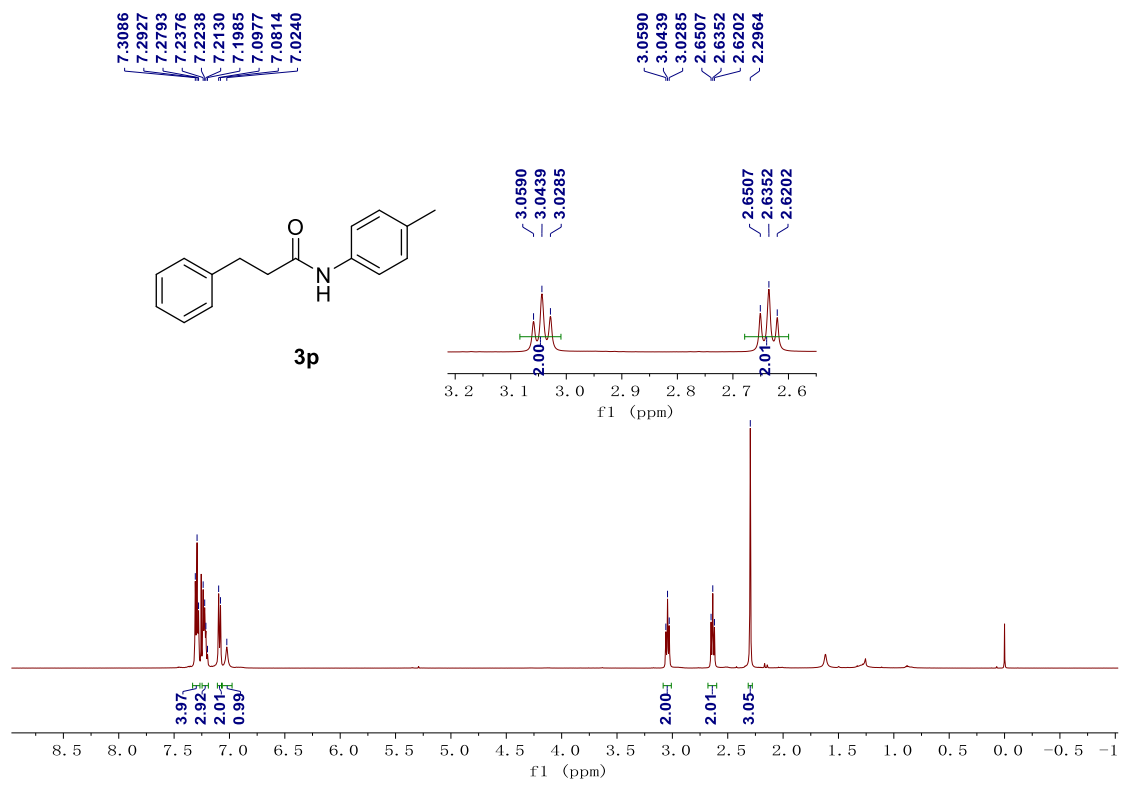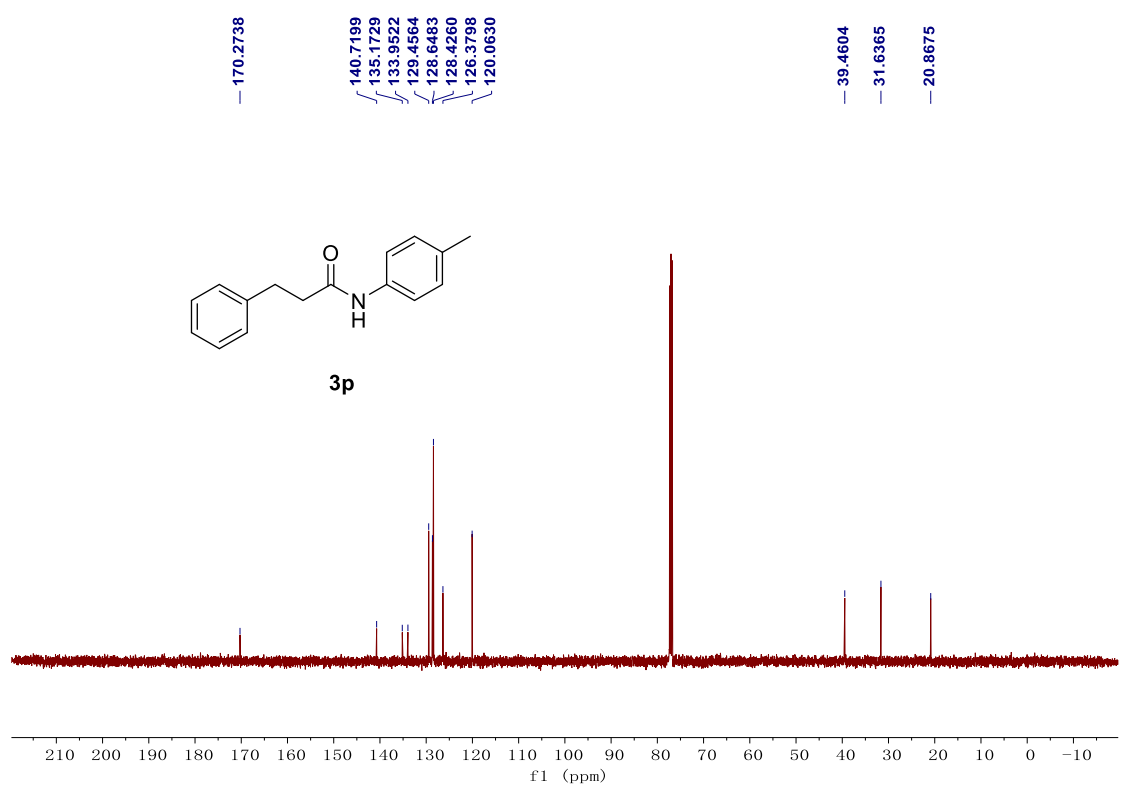

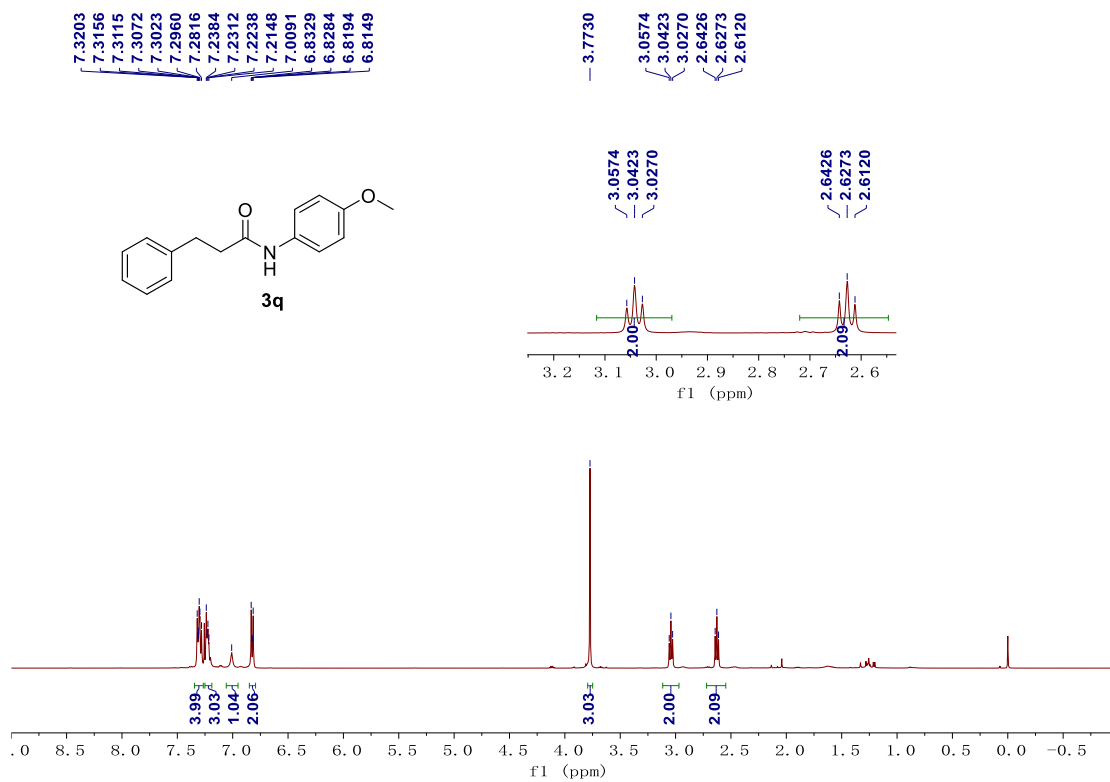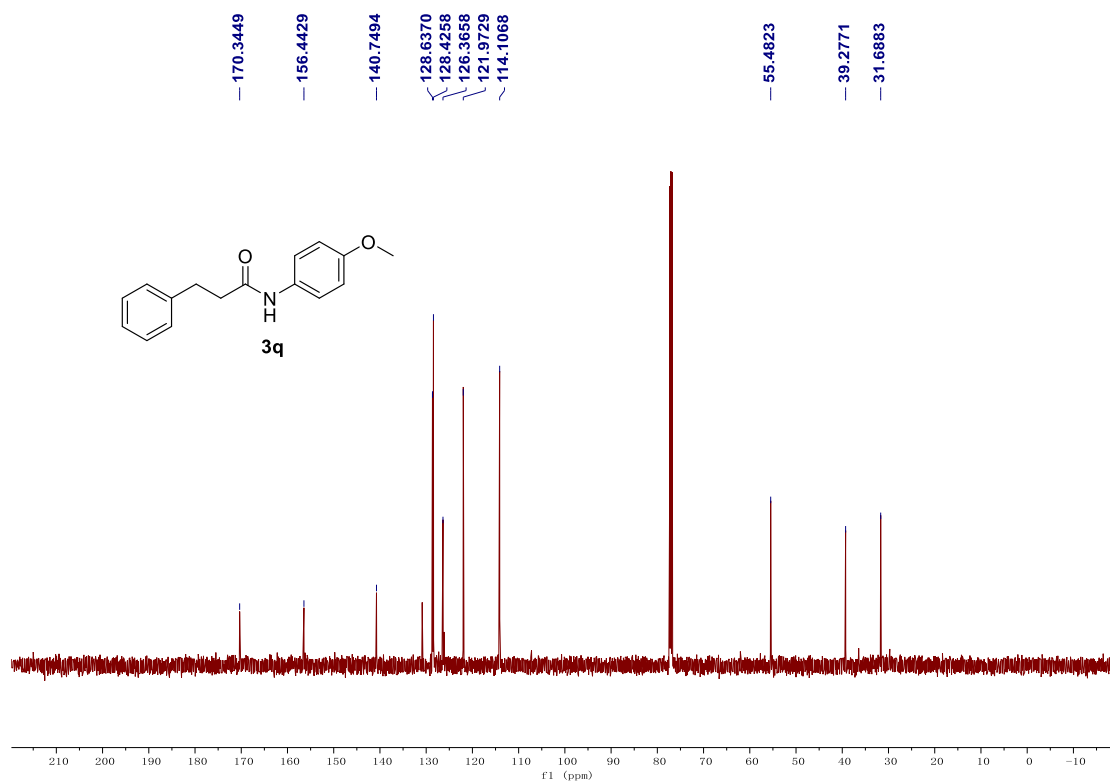

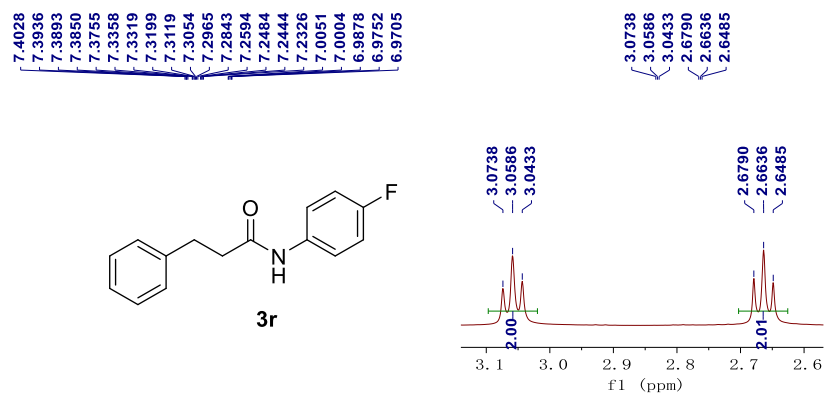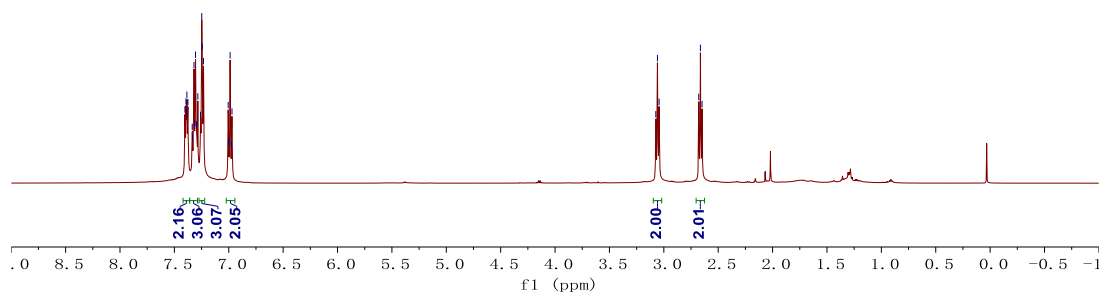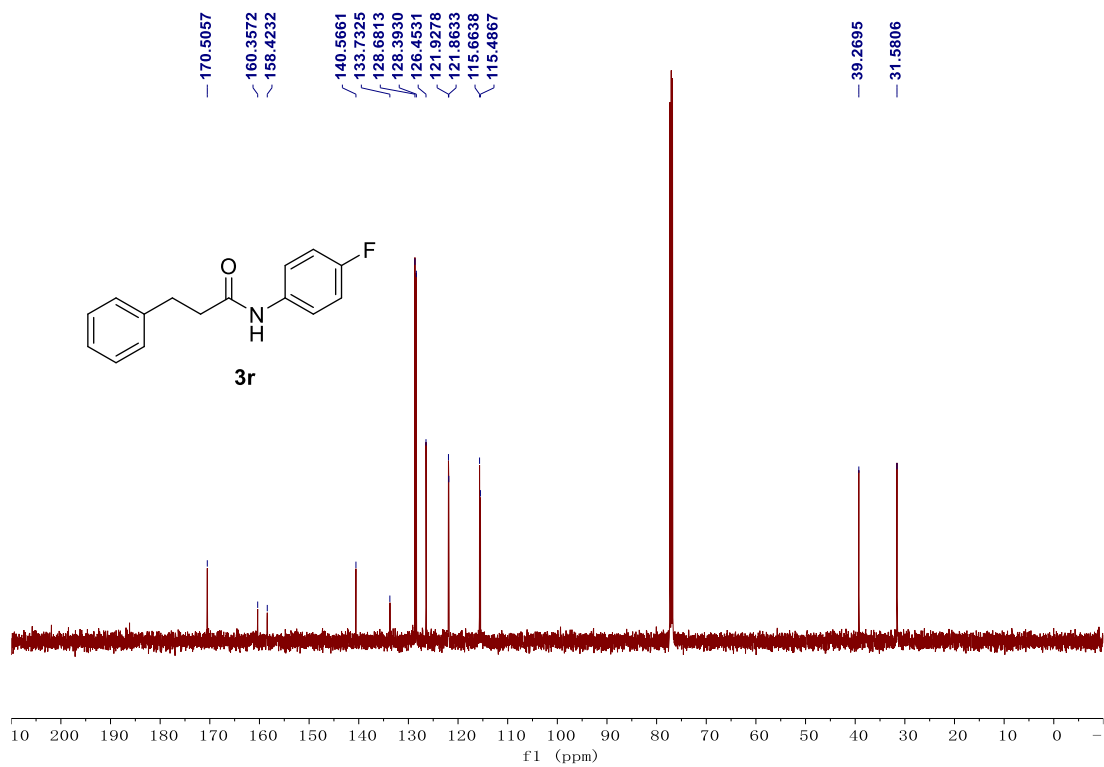

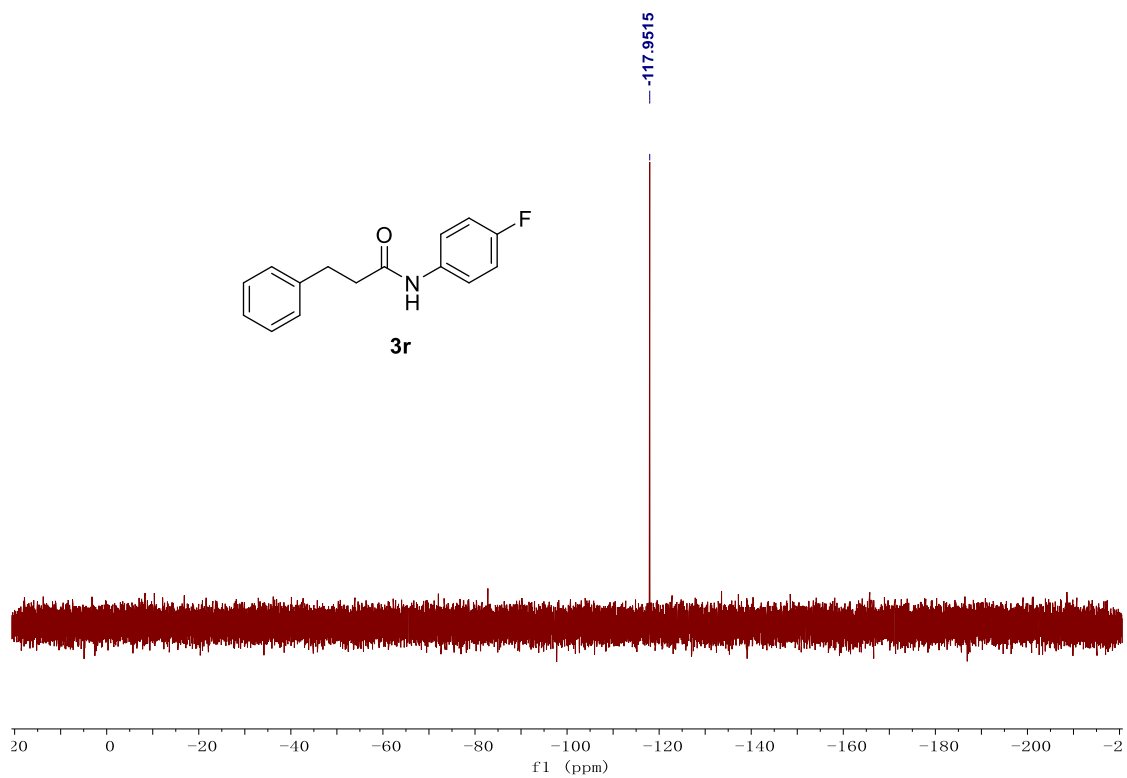

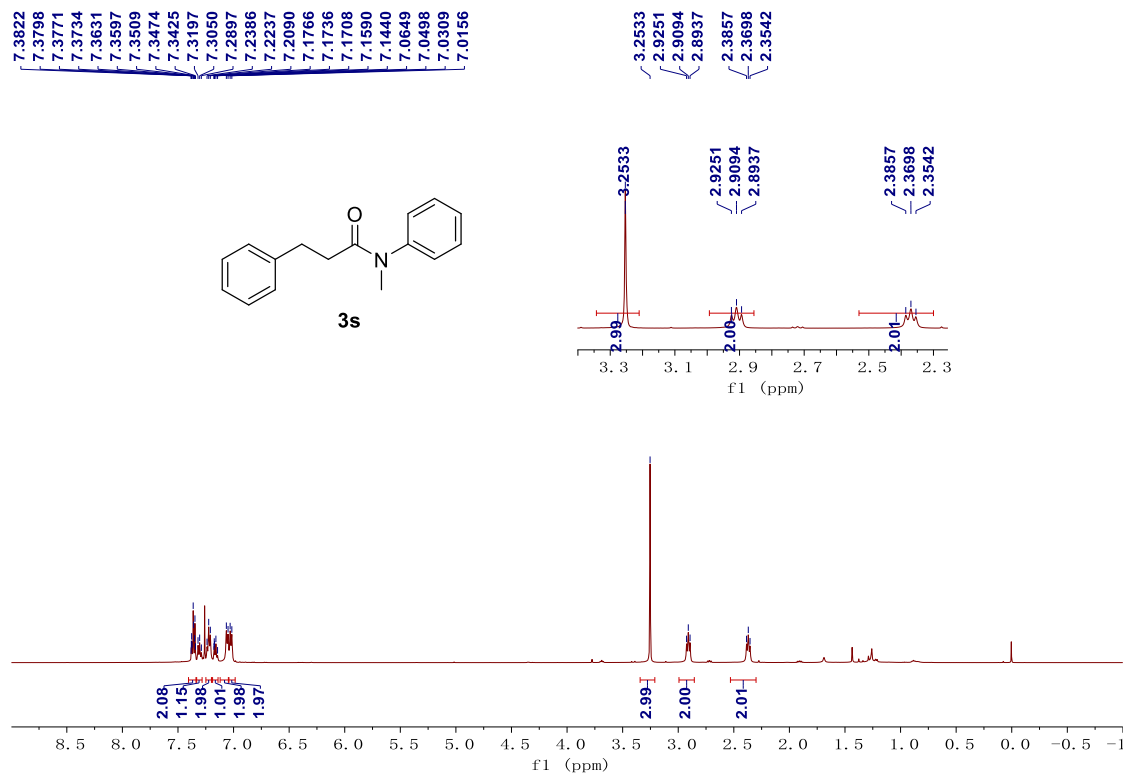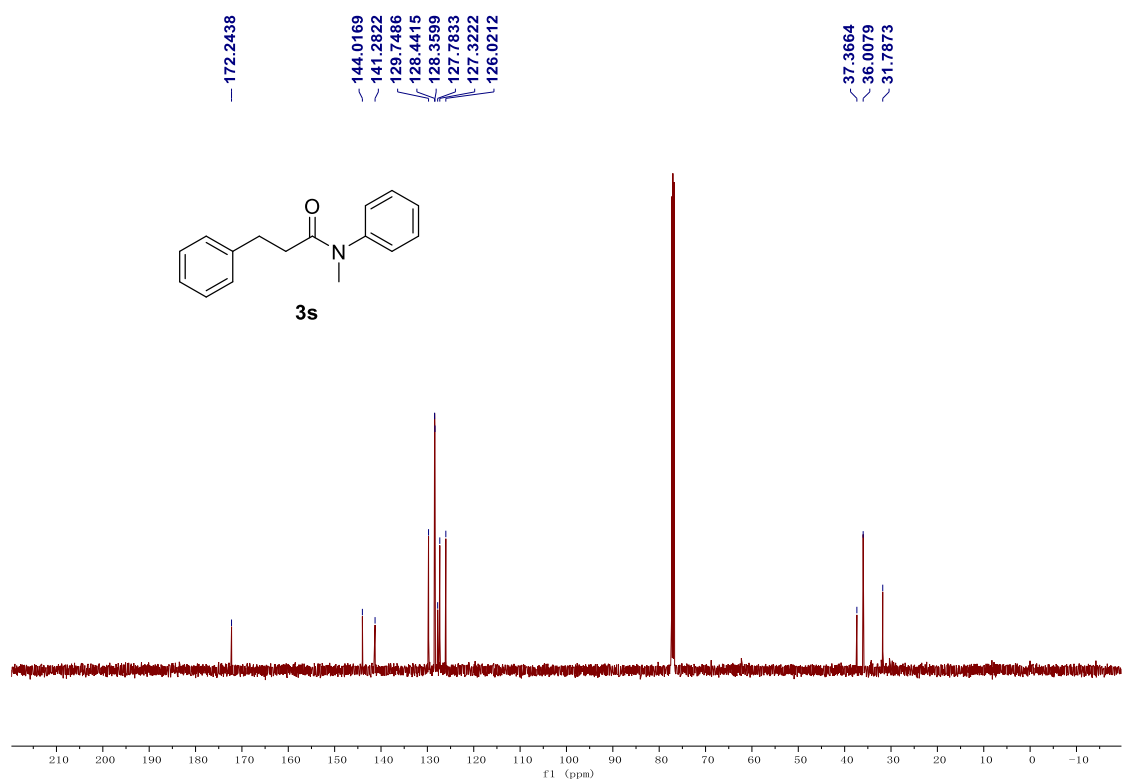

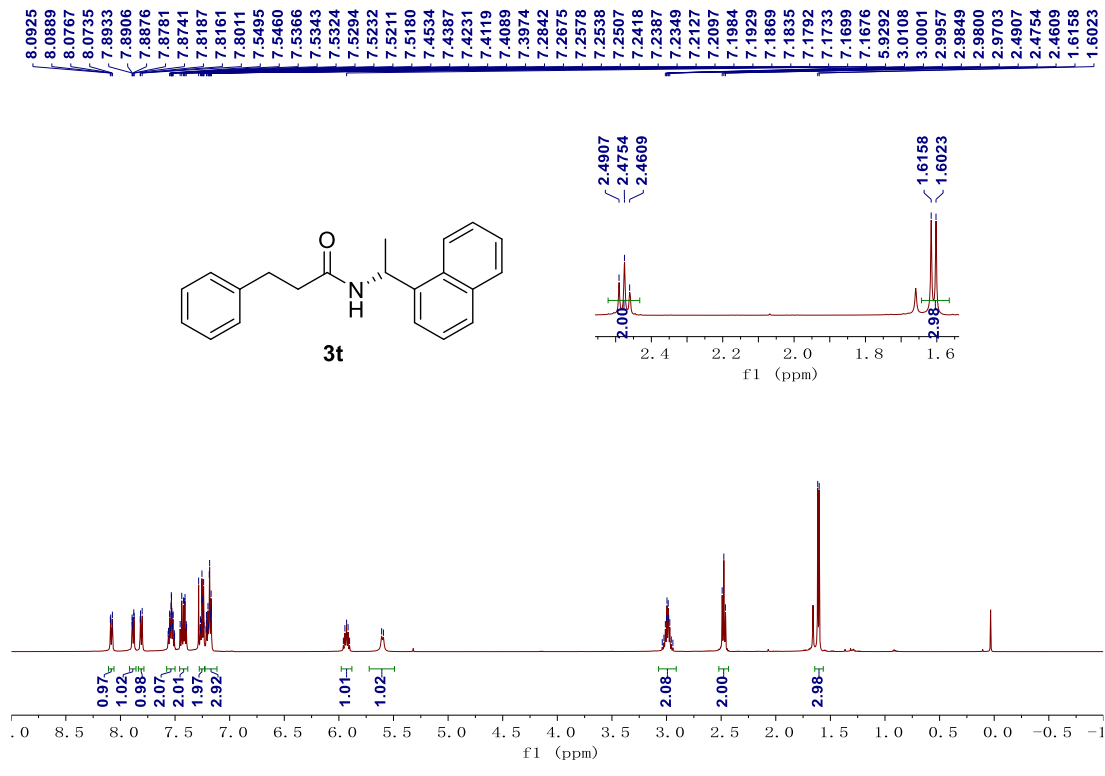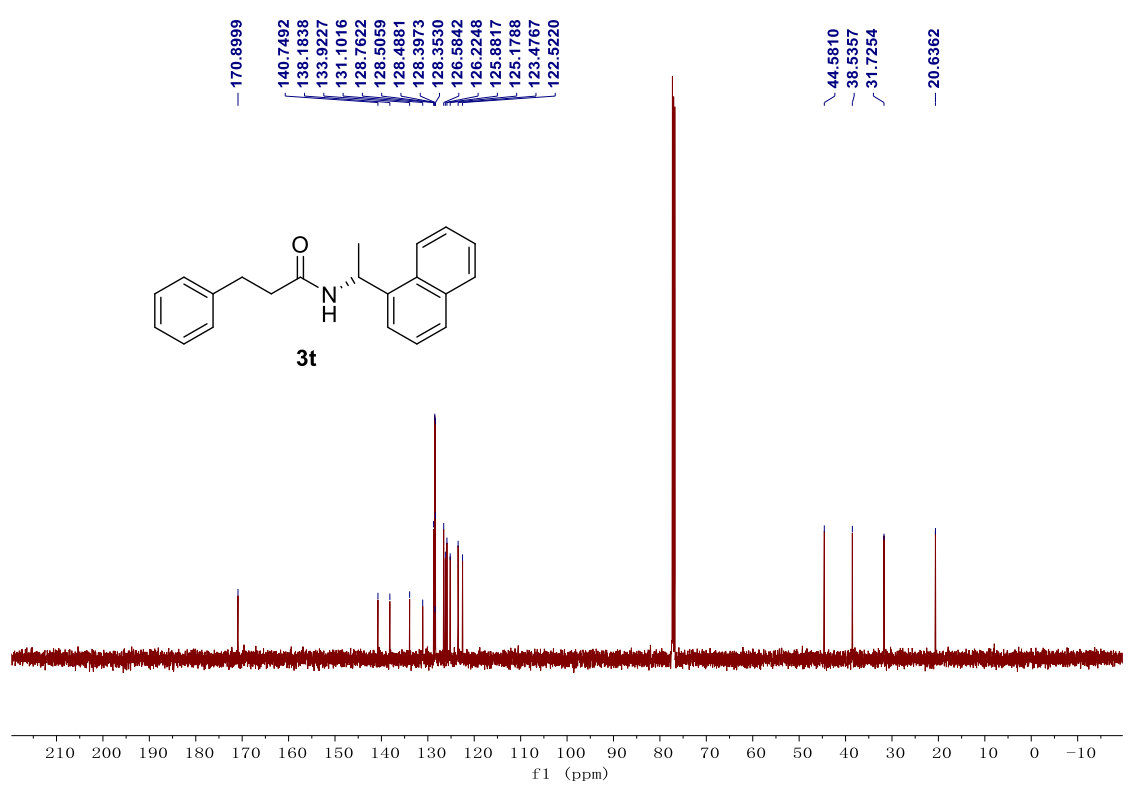

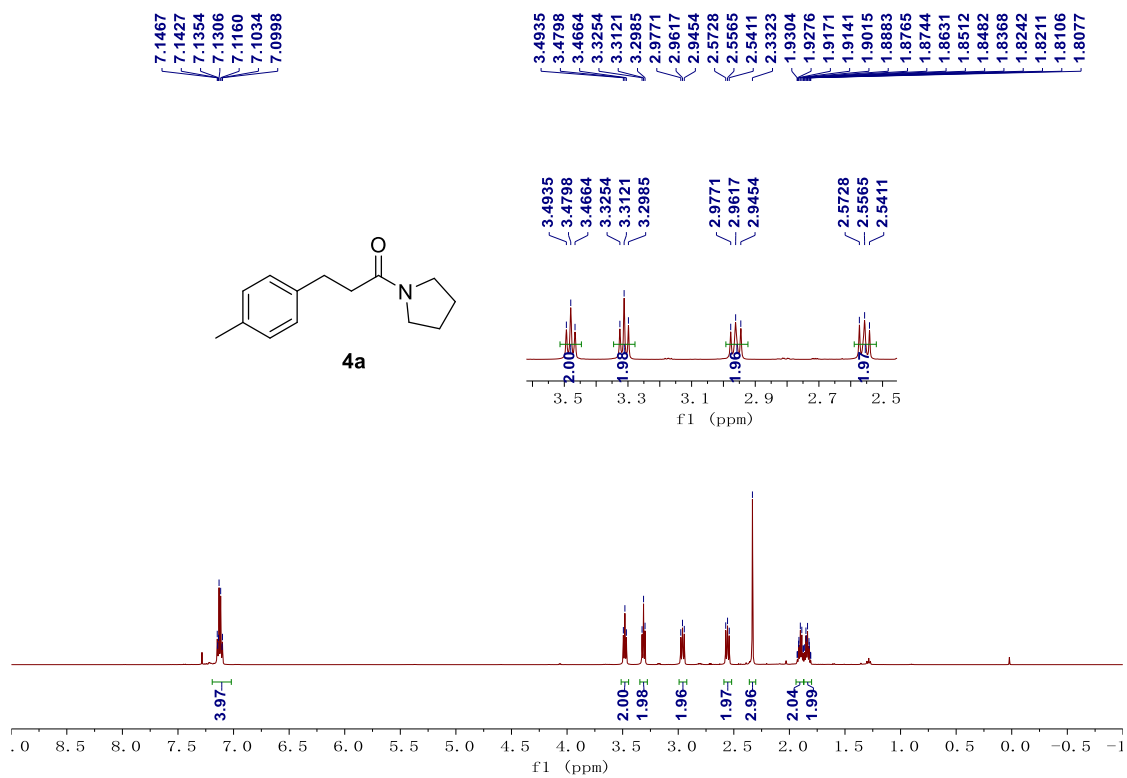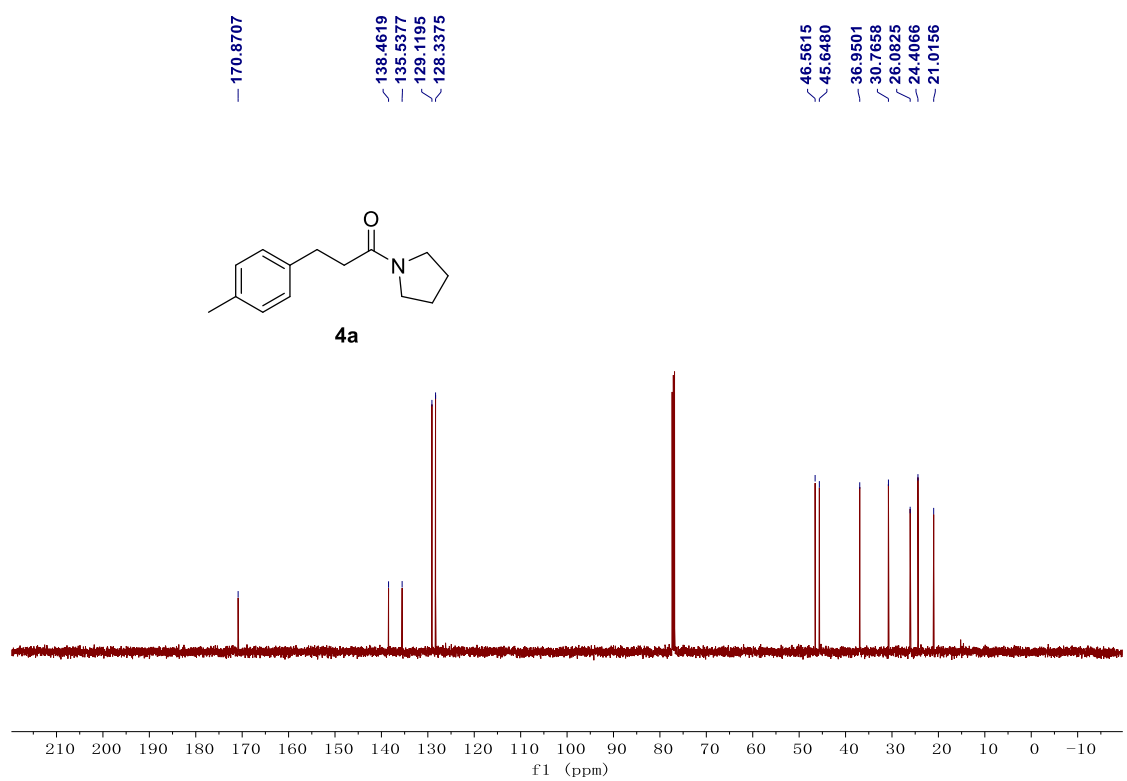



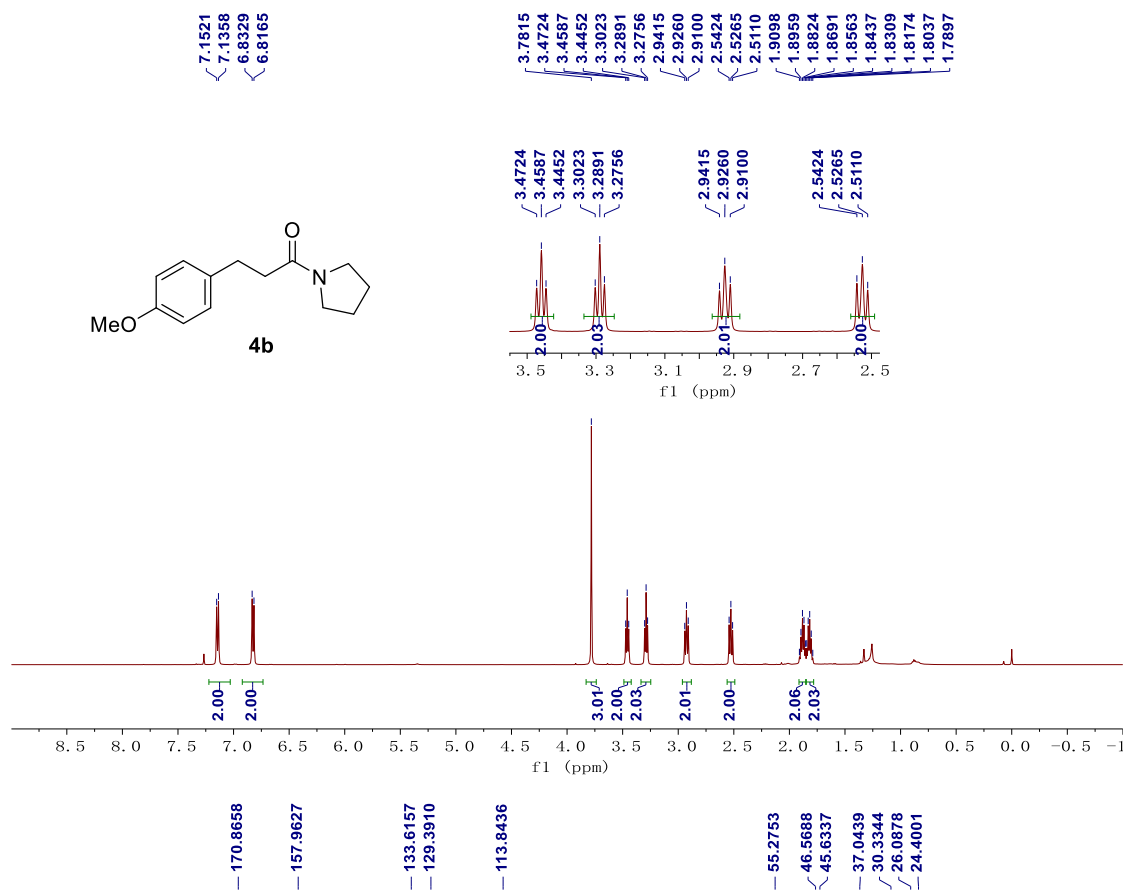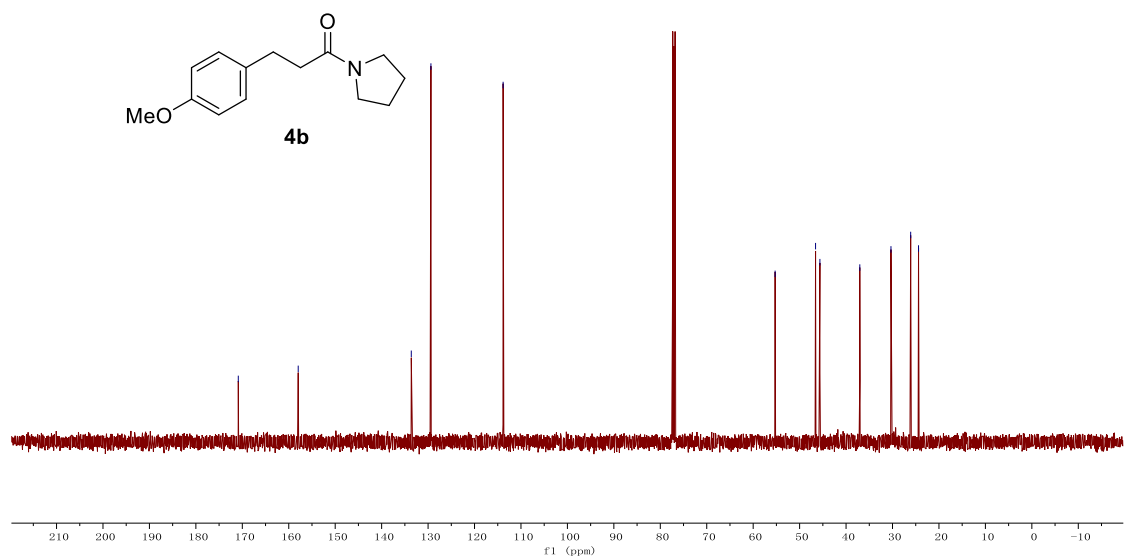

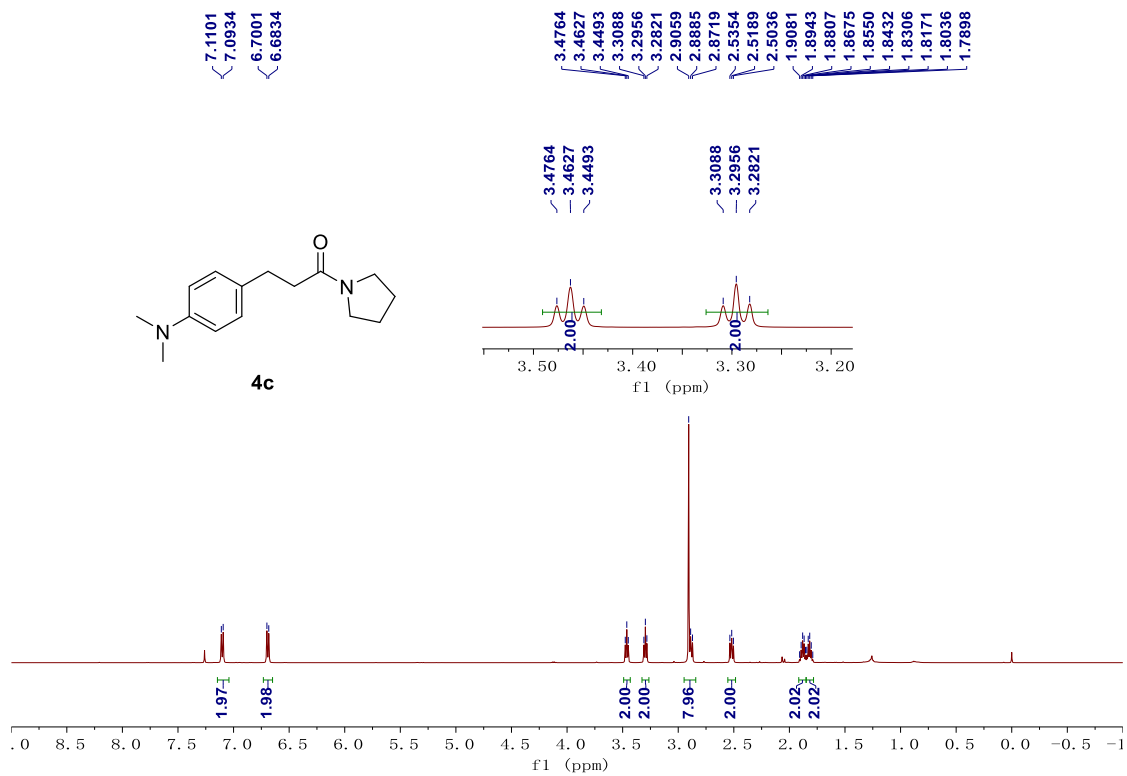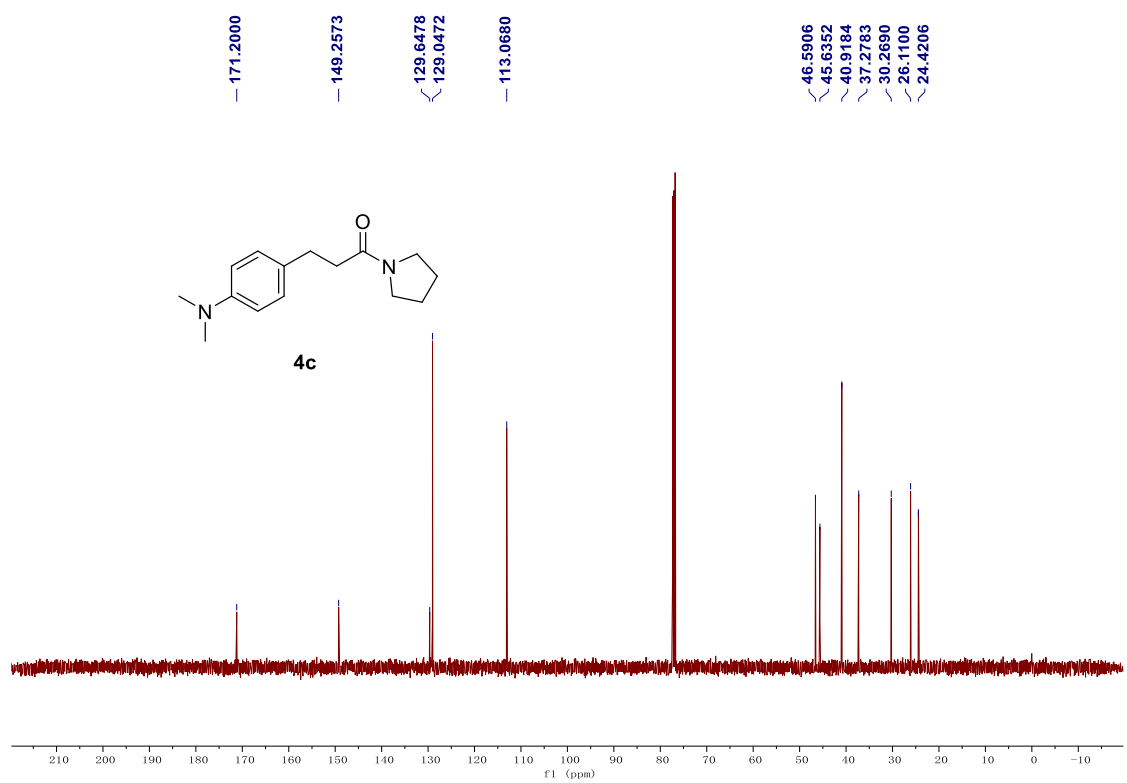

7.1937  
7.1827  
7.1772  
7.1663  
6.9704  
6.9534  
6.9363  
6.9255

3.4660  
3.4522  
3.4387  
3.3045  
3.2913  
3.2777  
2.9703  
2.9550  
2.9393  
2.5484  
2.5329  
2.5175  
1.9165  
1.9028  
1.8892  
1.8758  
1.8628  
1.8453  
1.8322  
1.8185  
1.8048  
1.7910

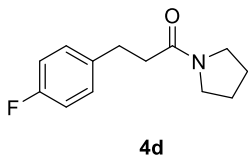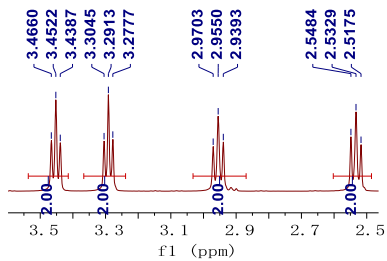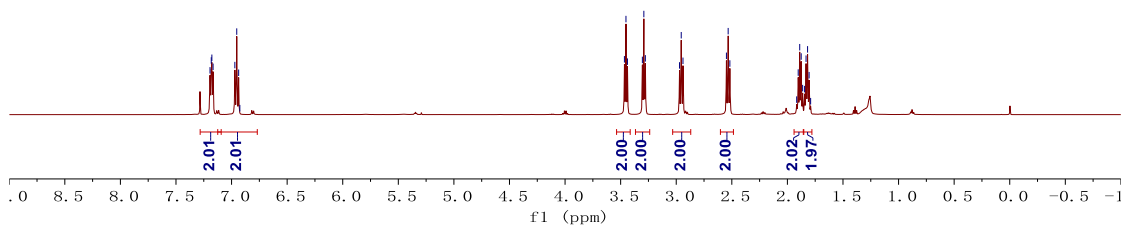

170.4897  
162.3339  
160.3968

137.1917  
137.1680  
129.8884  
129.8291

115.1961  
115.0280

46.5464  
45.6447  
36.7077  
30.2989  
26.0516  
24.3650

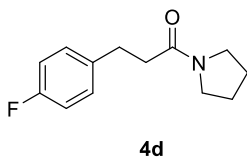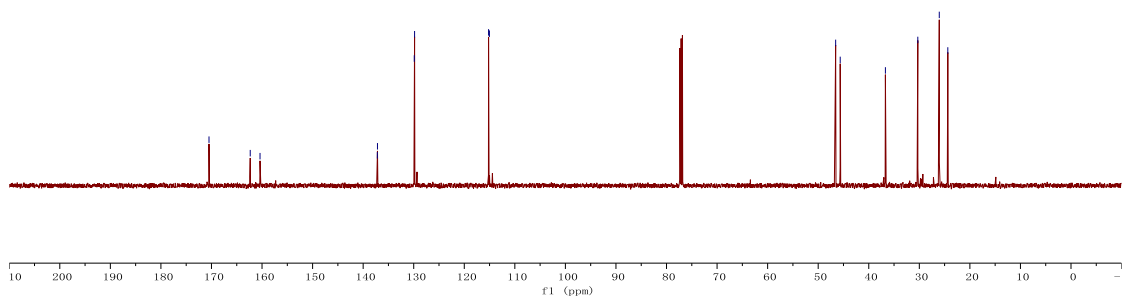

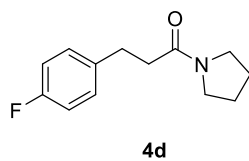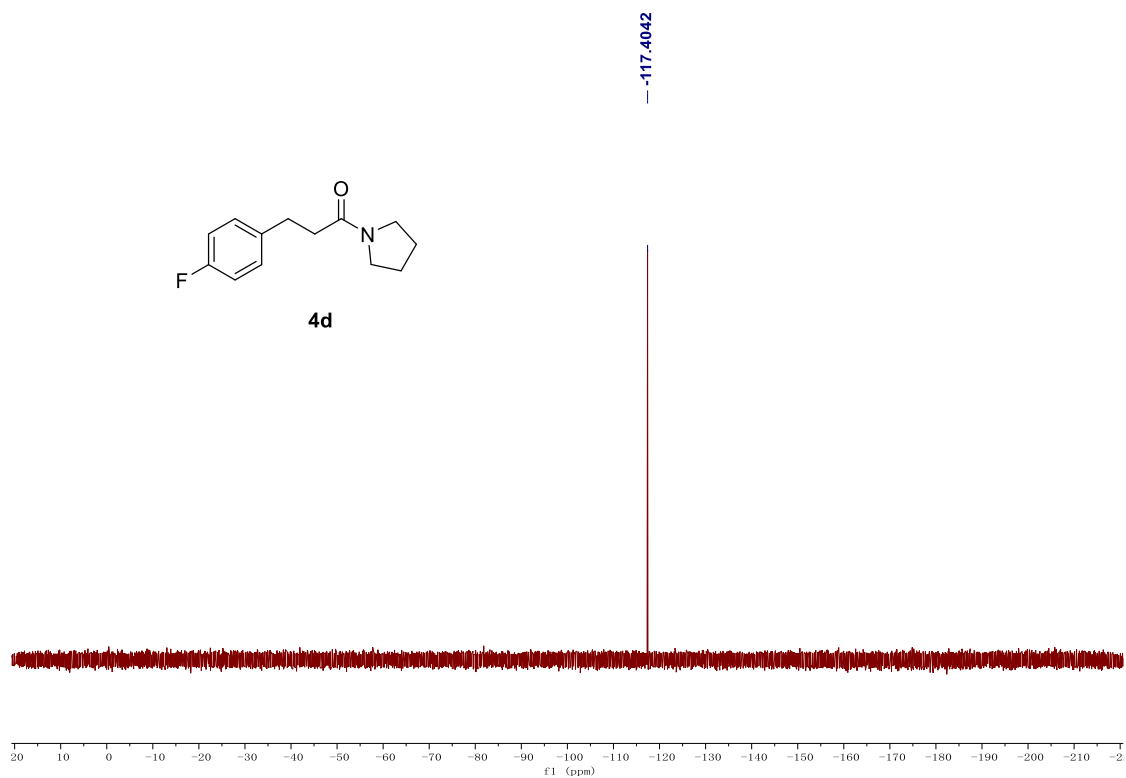

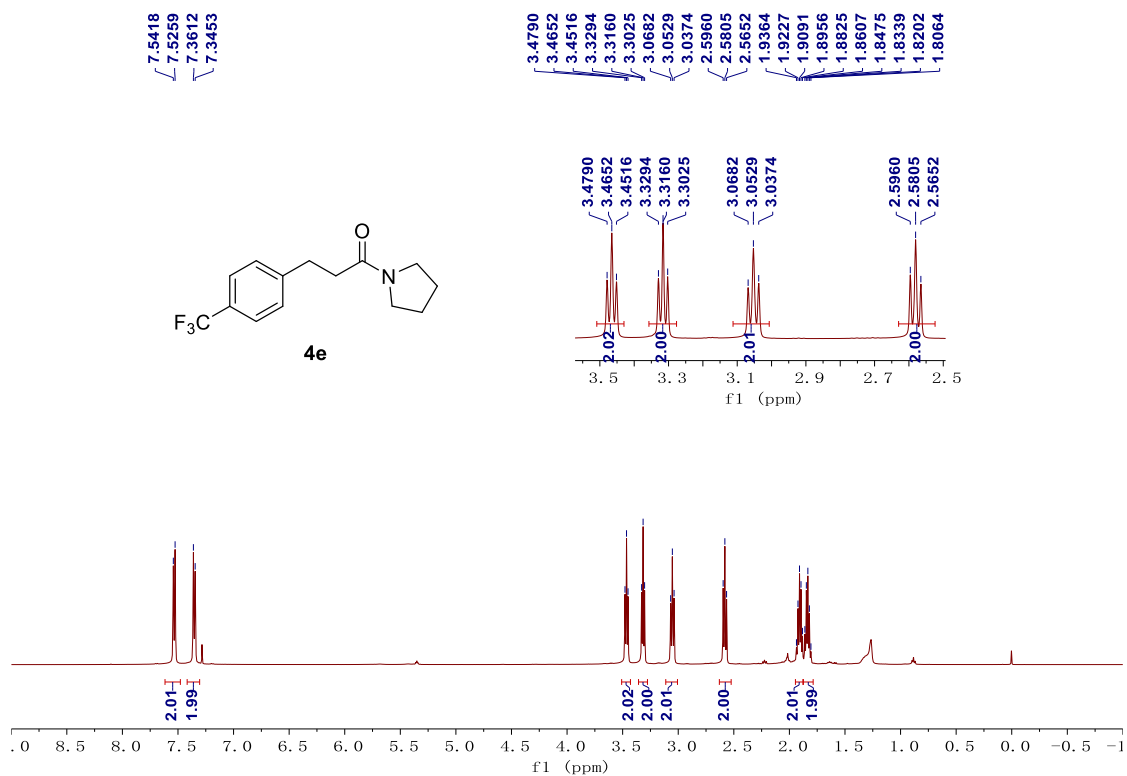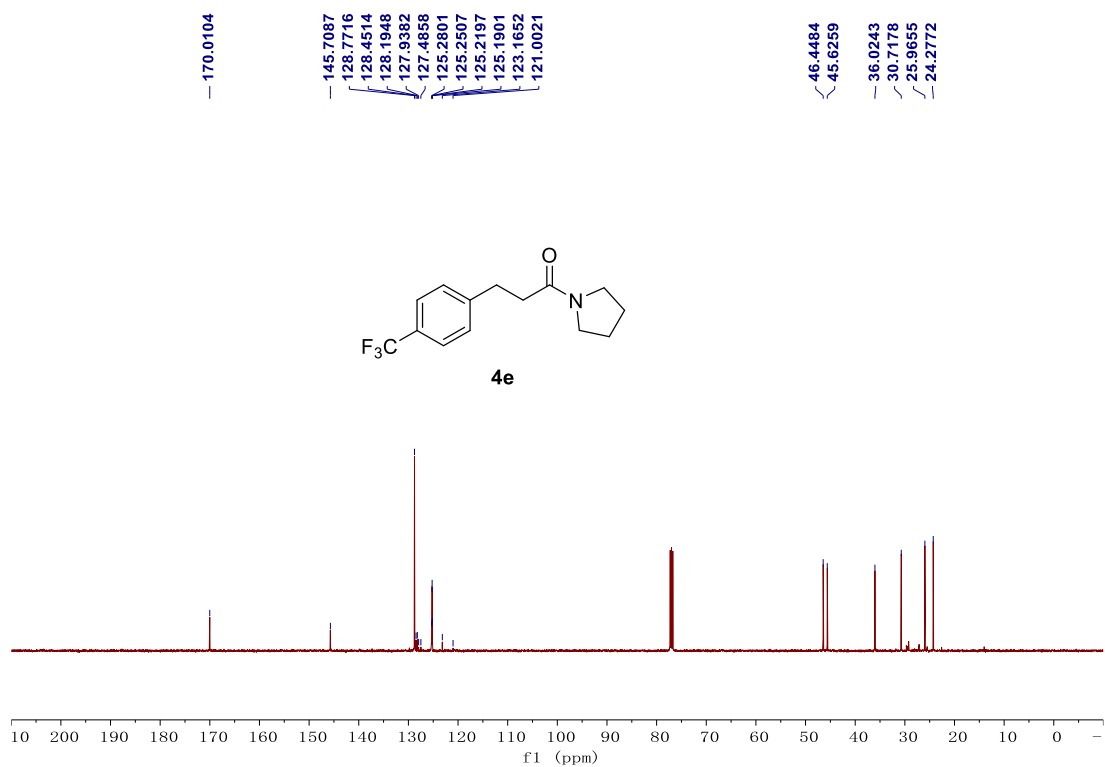

-62.3650

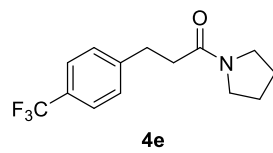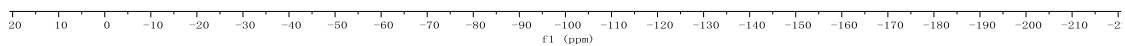

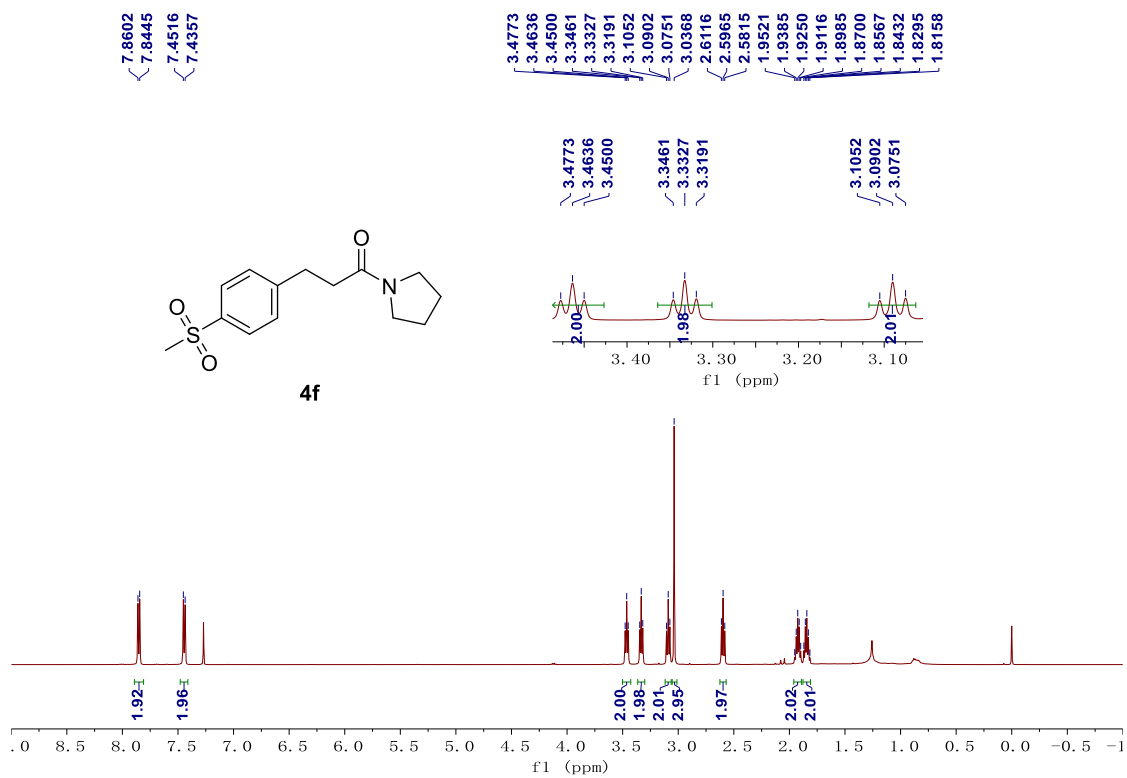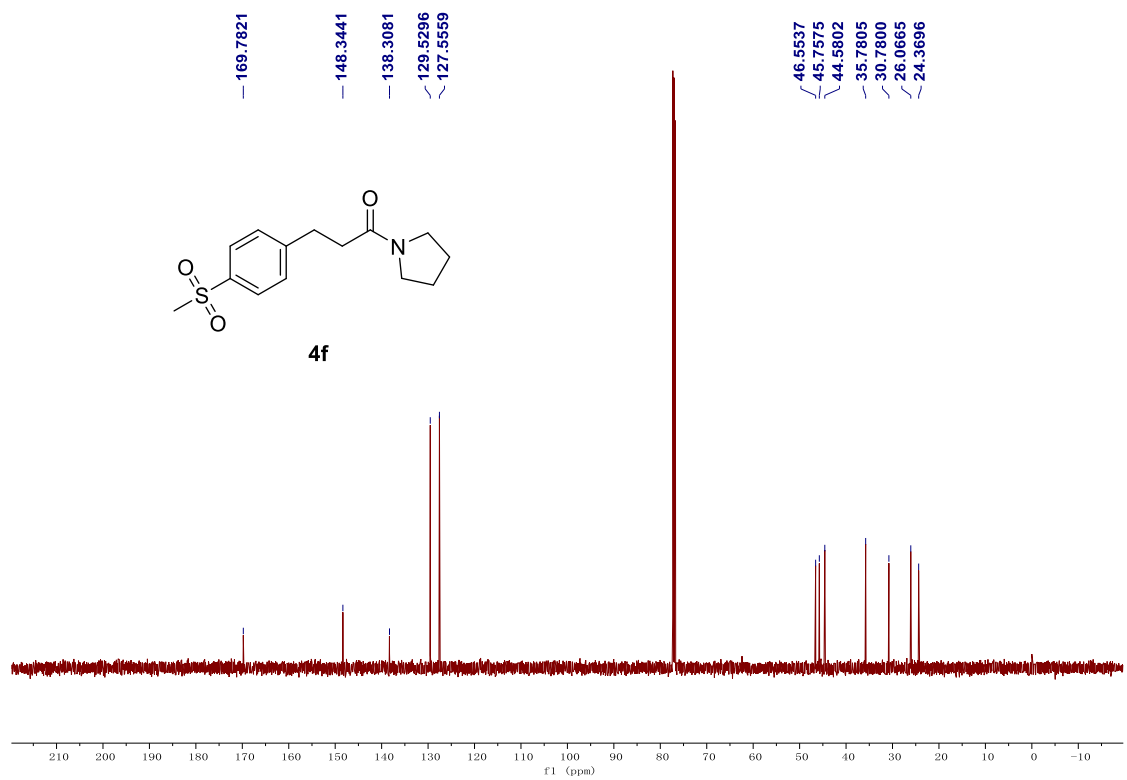

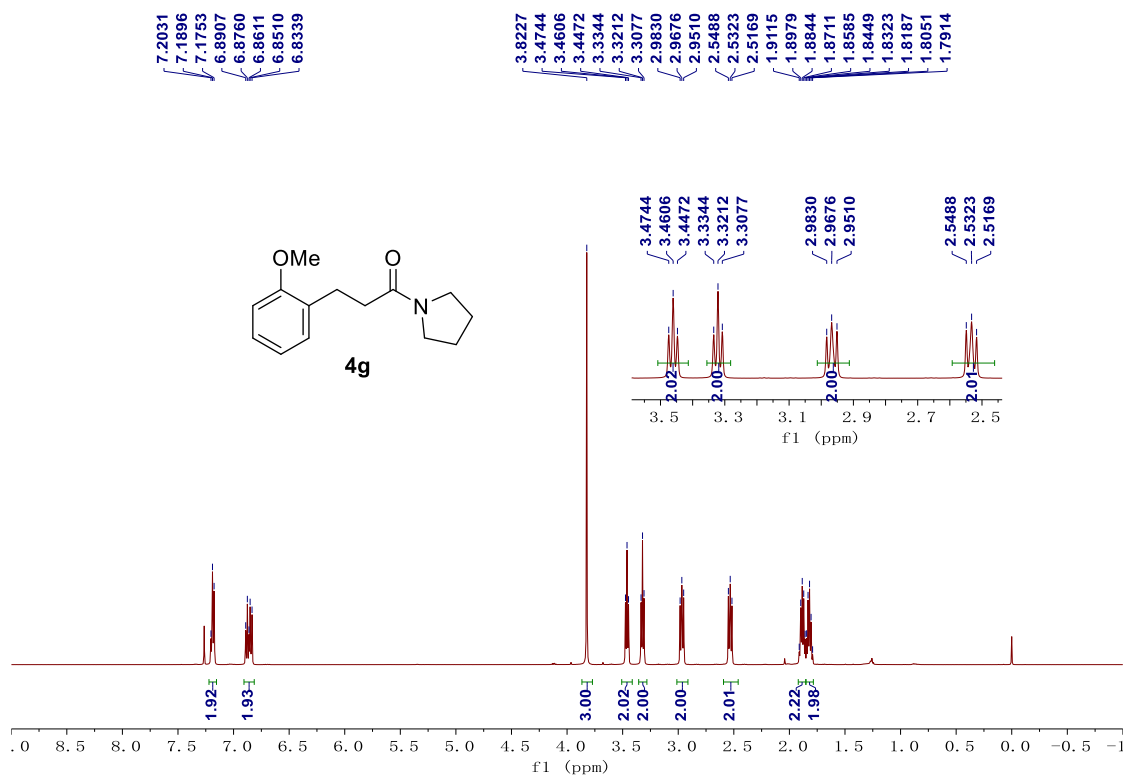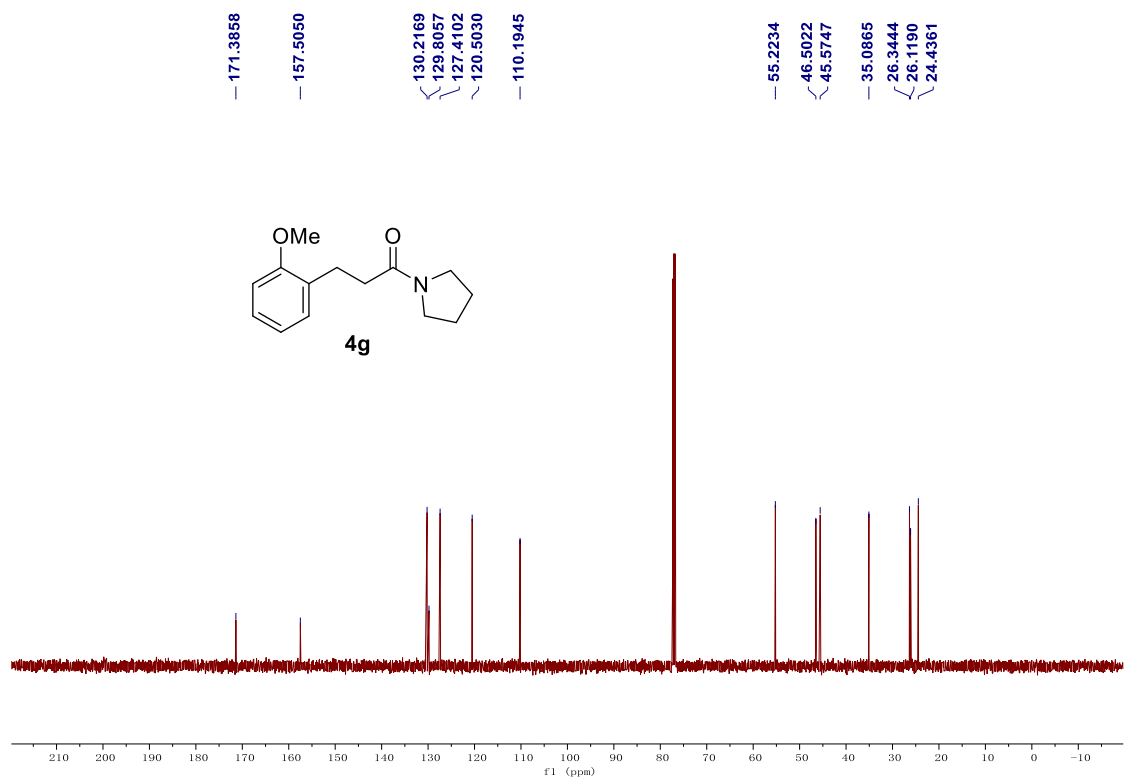



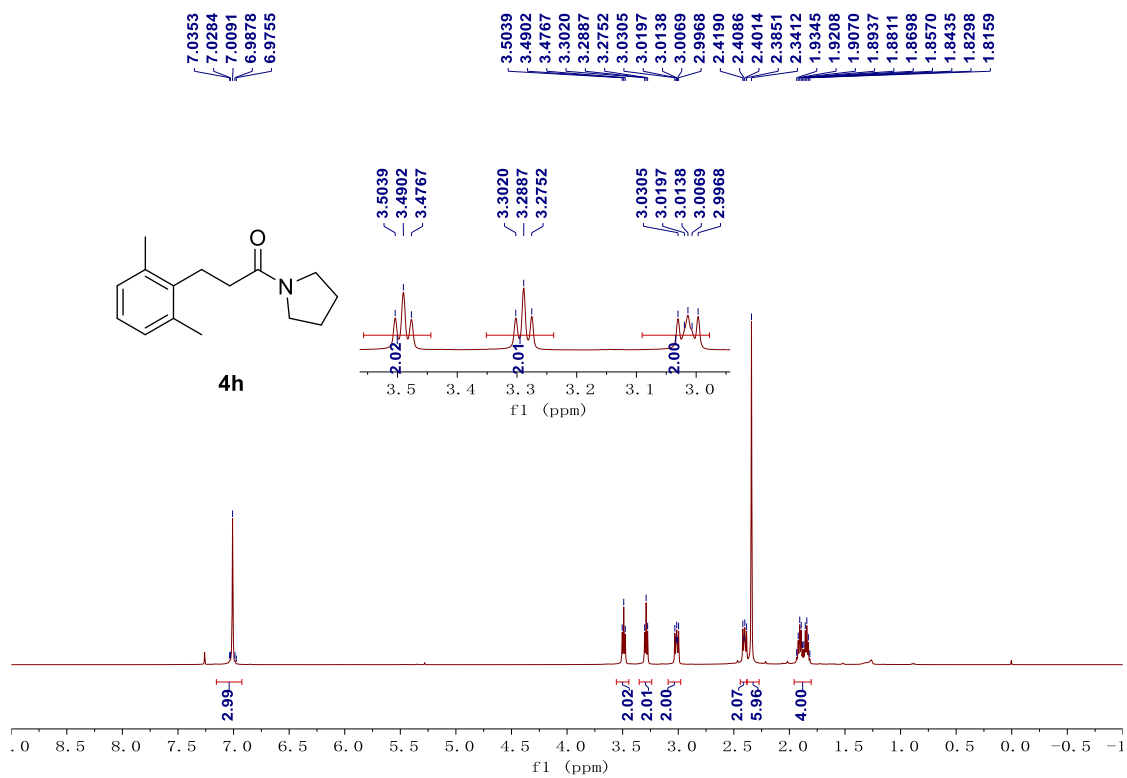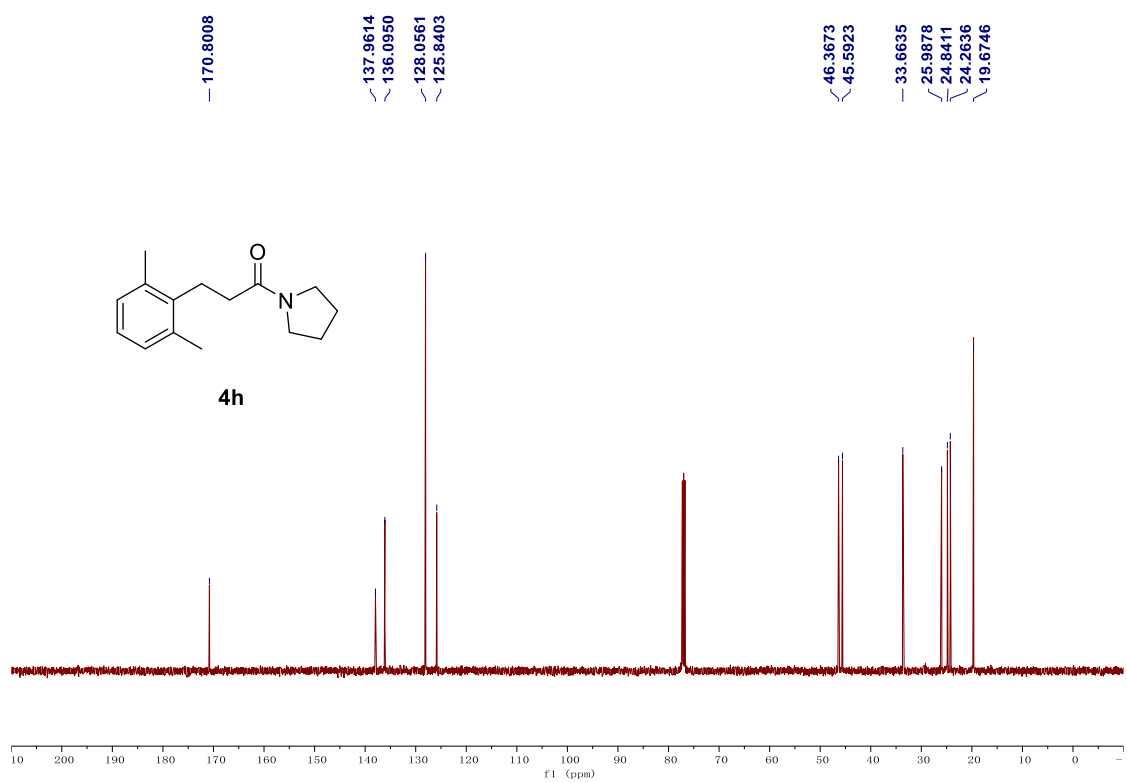

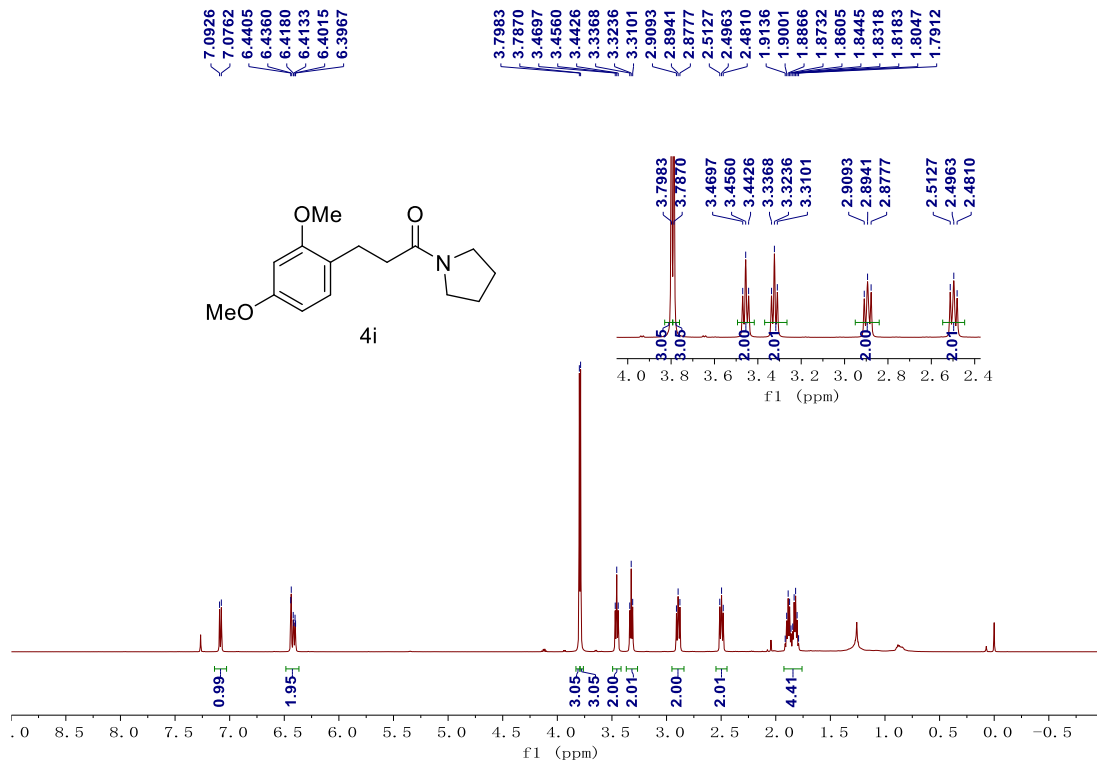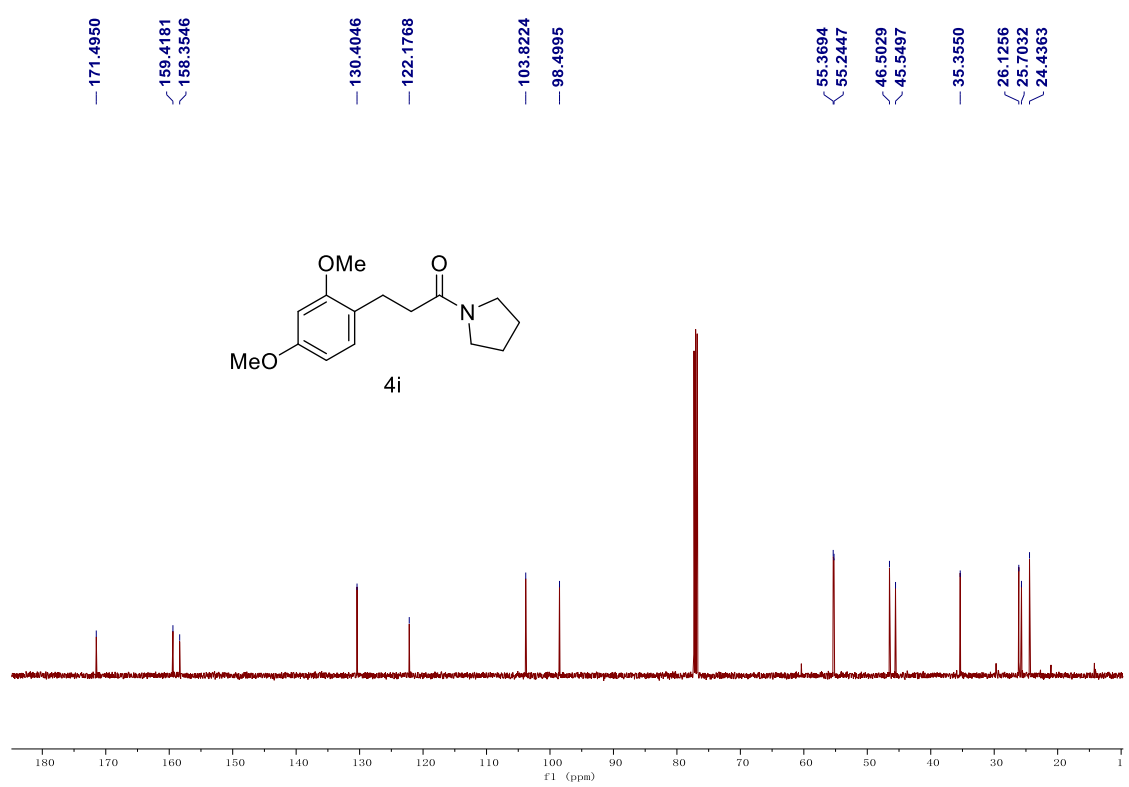

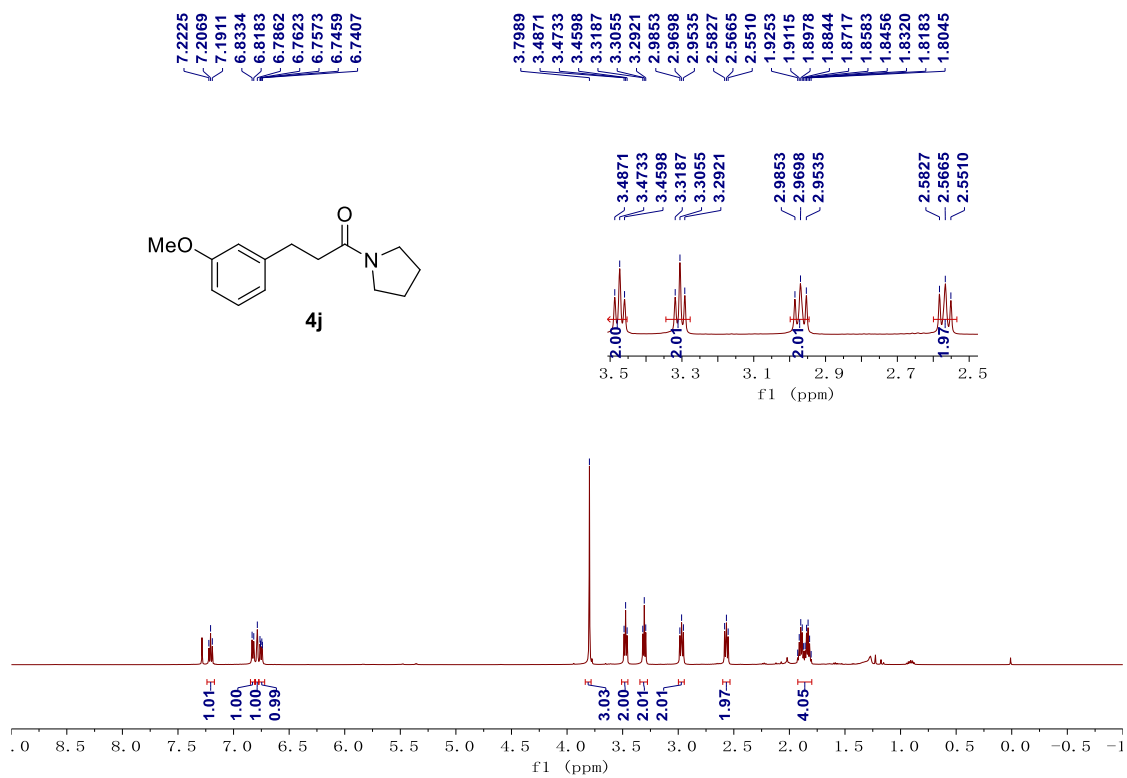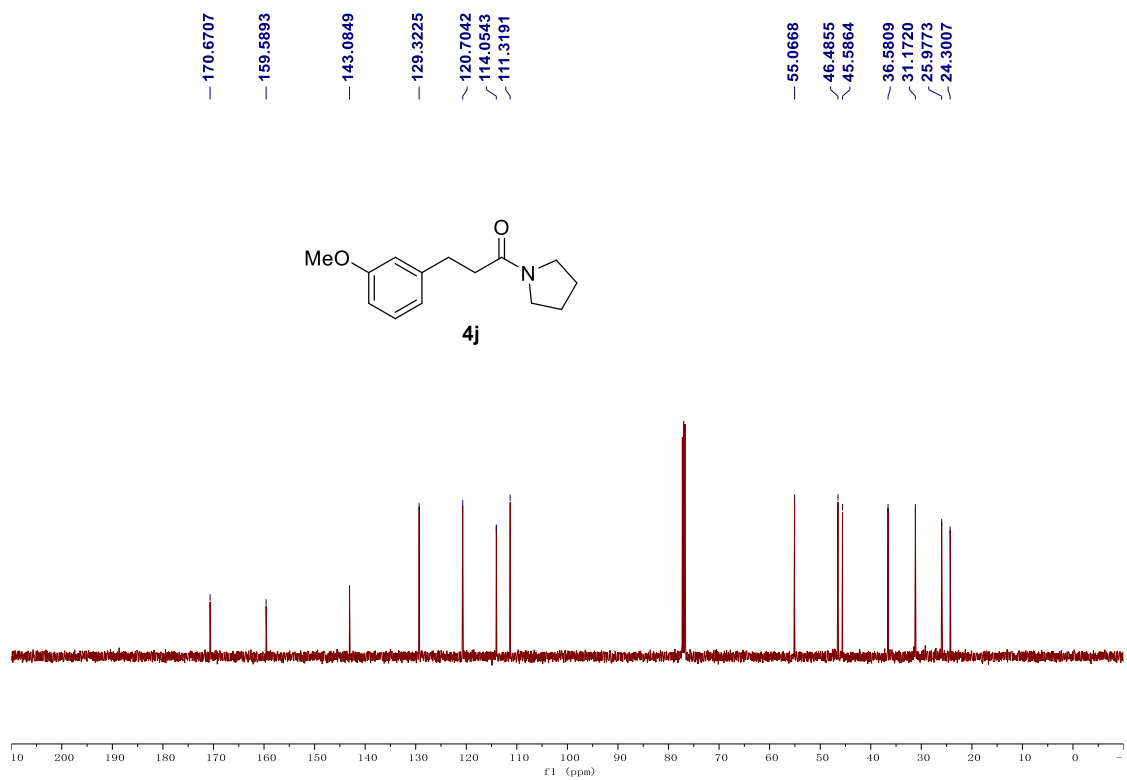

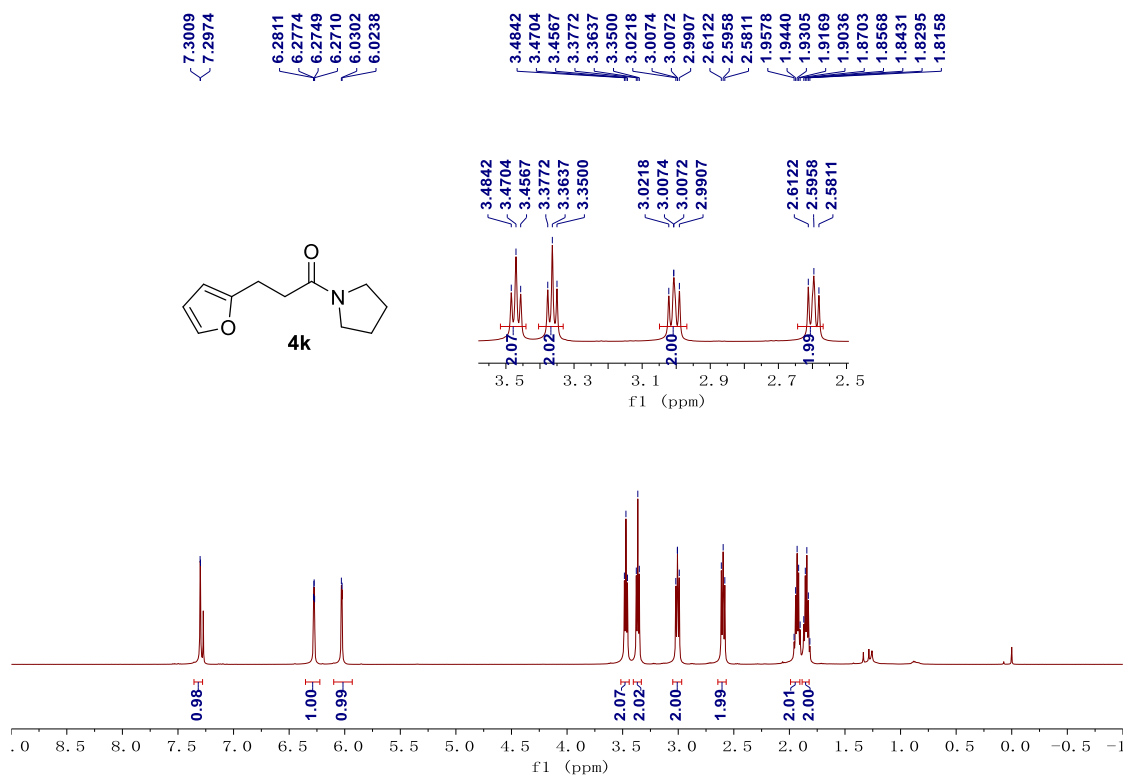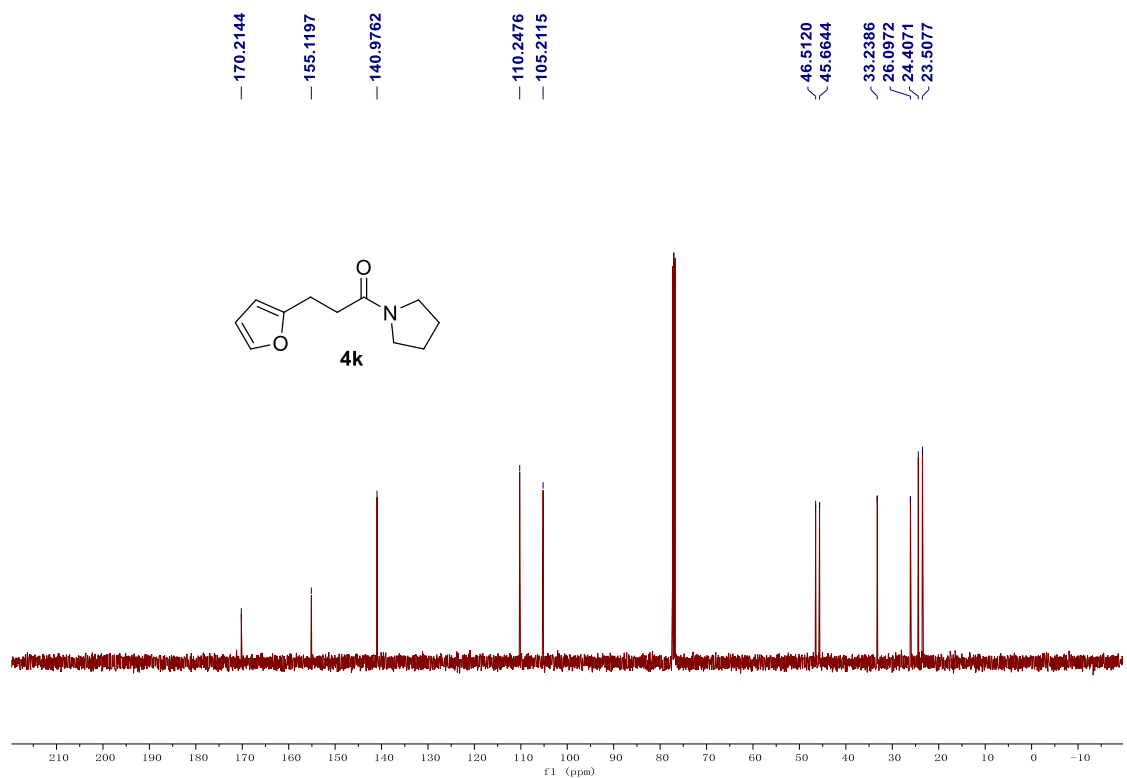

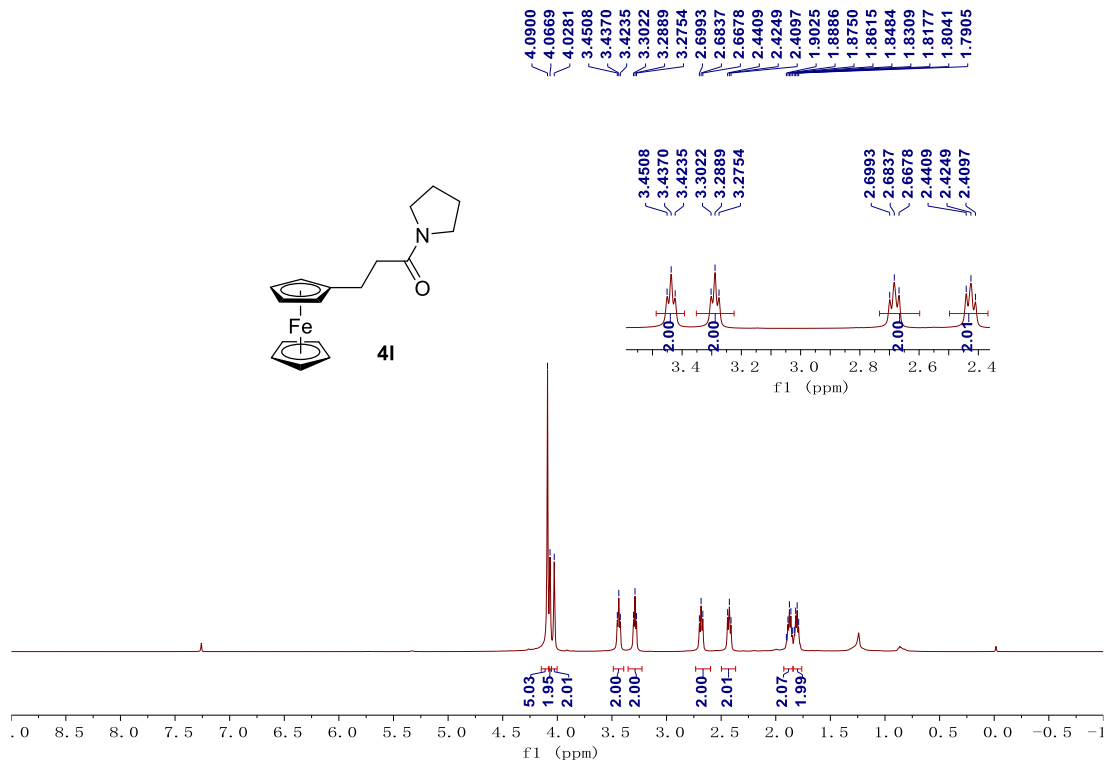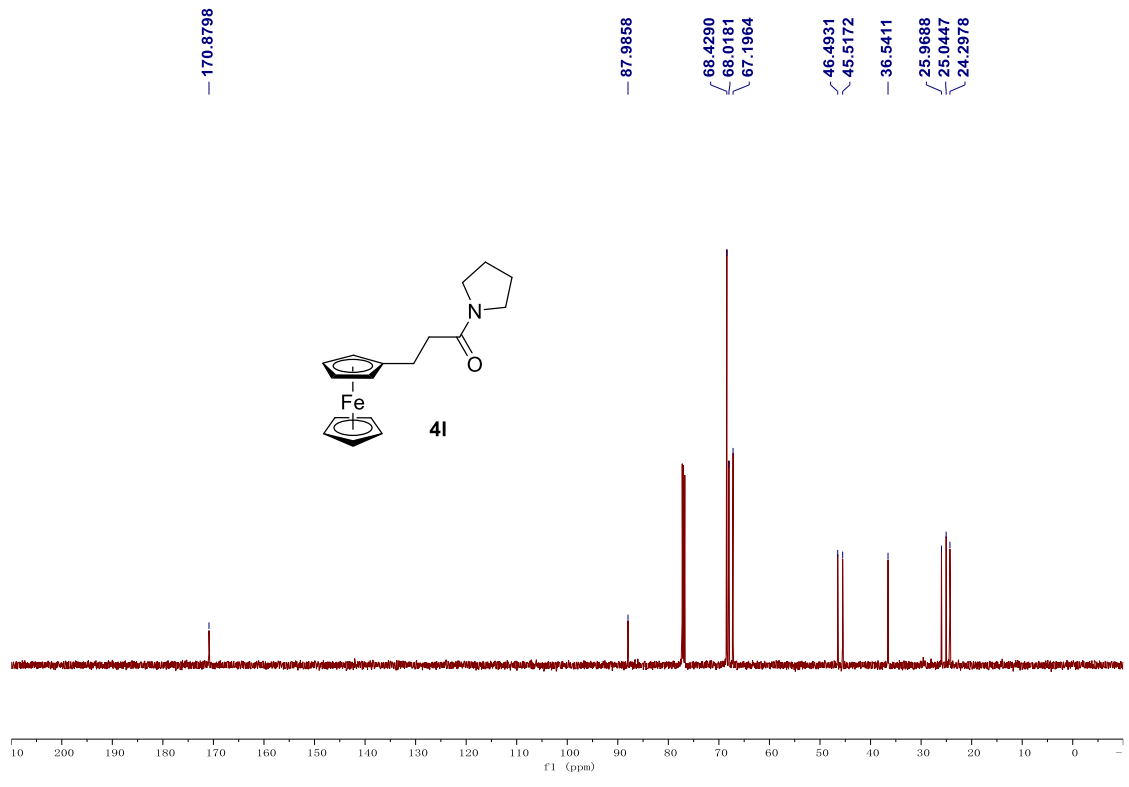

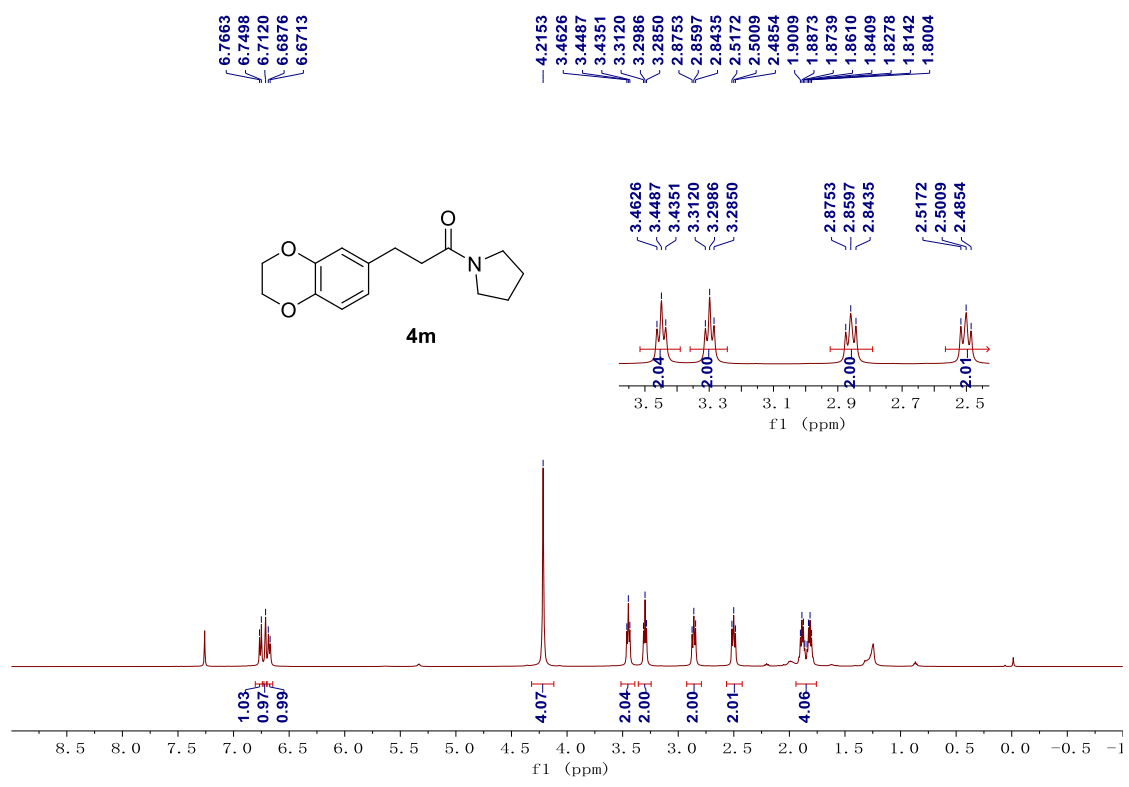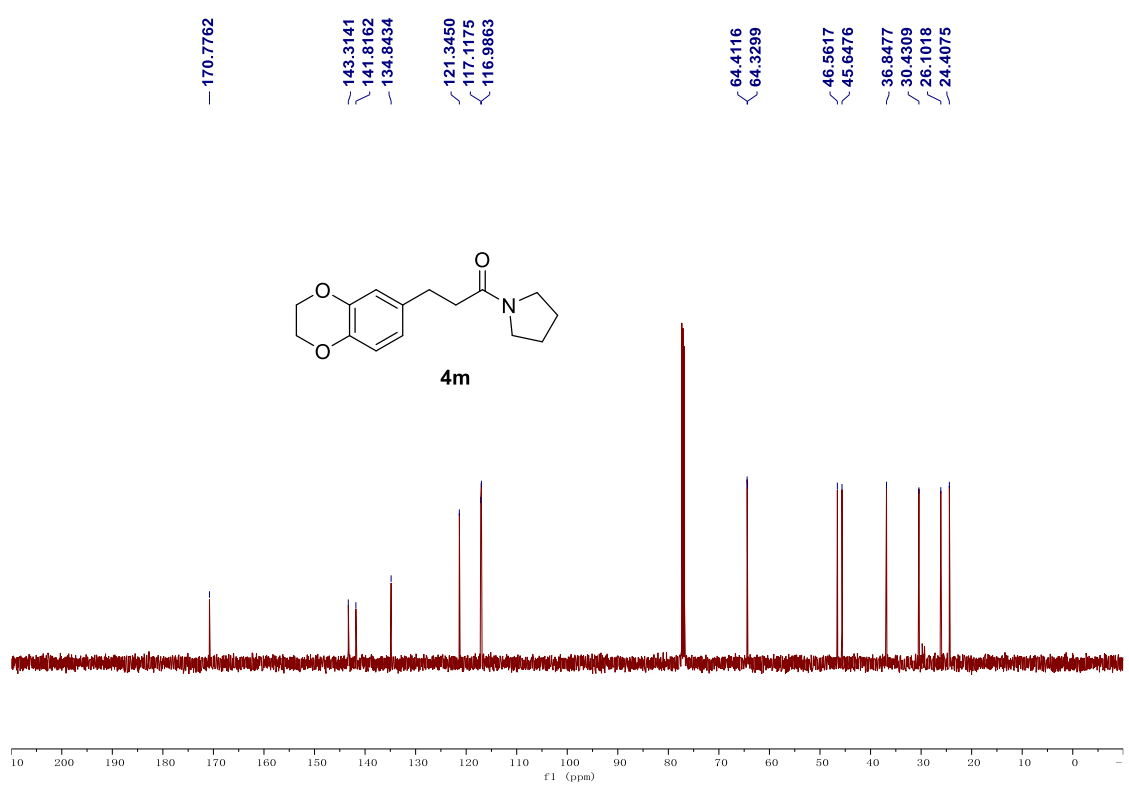

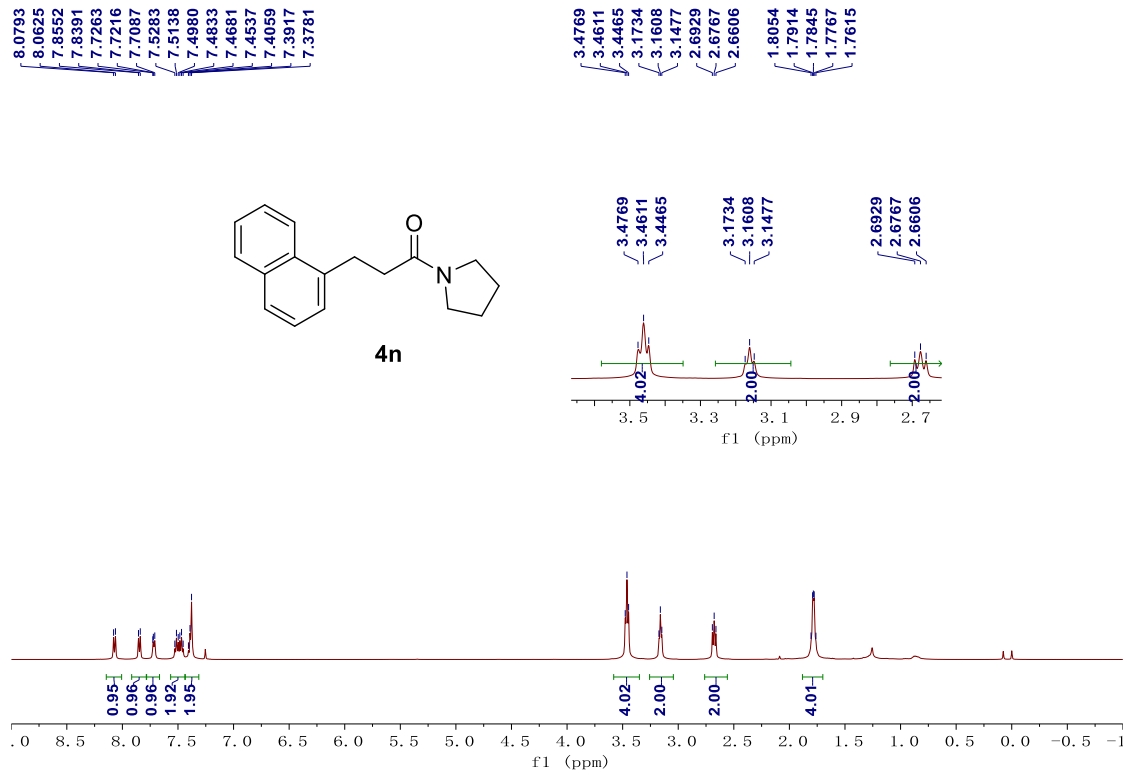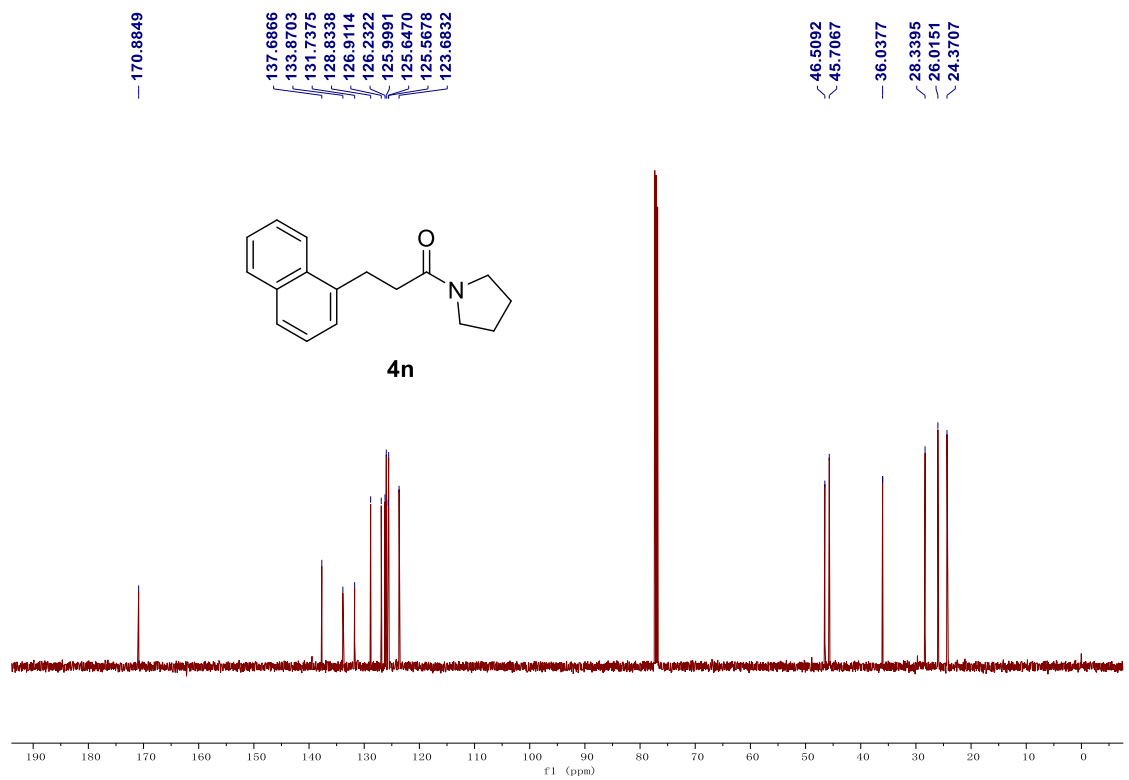

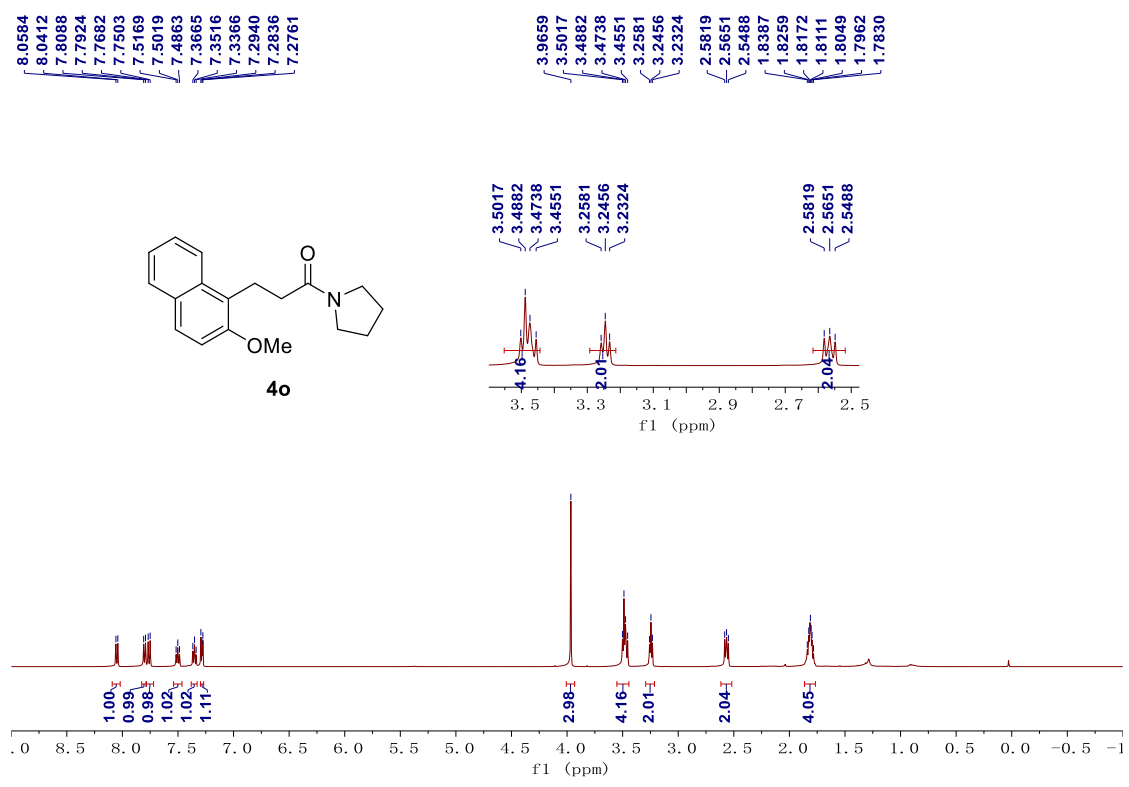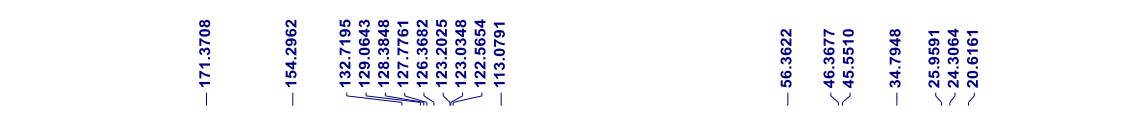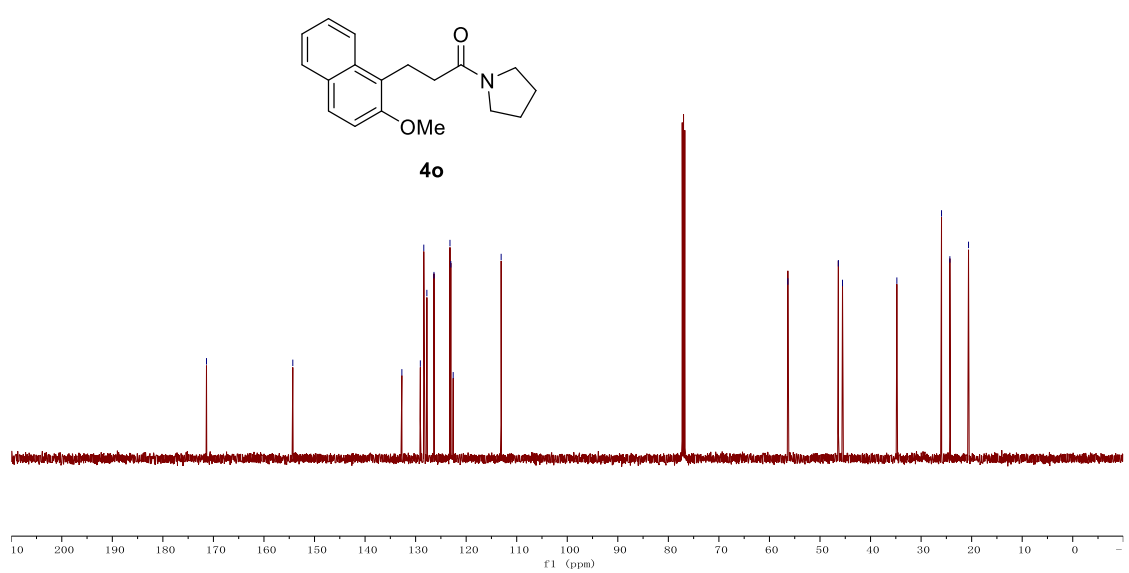



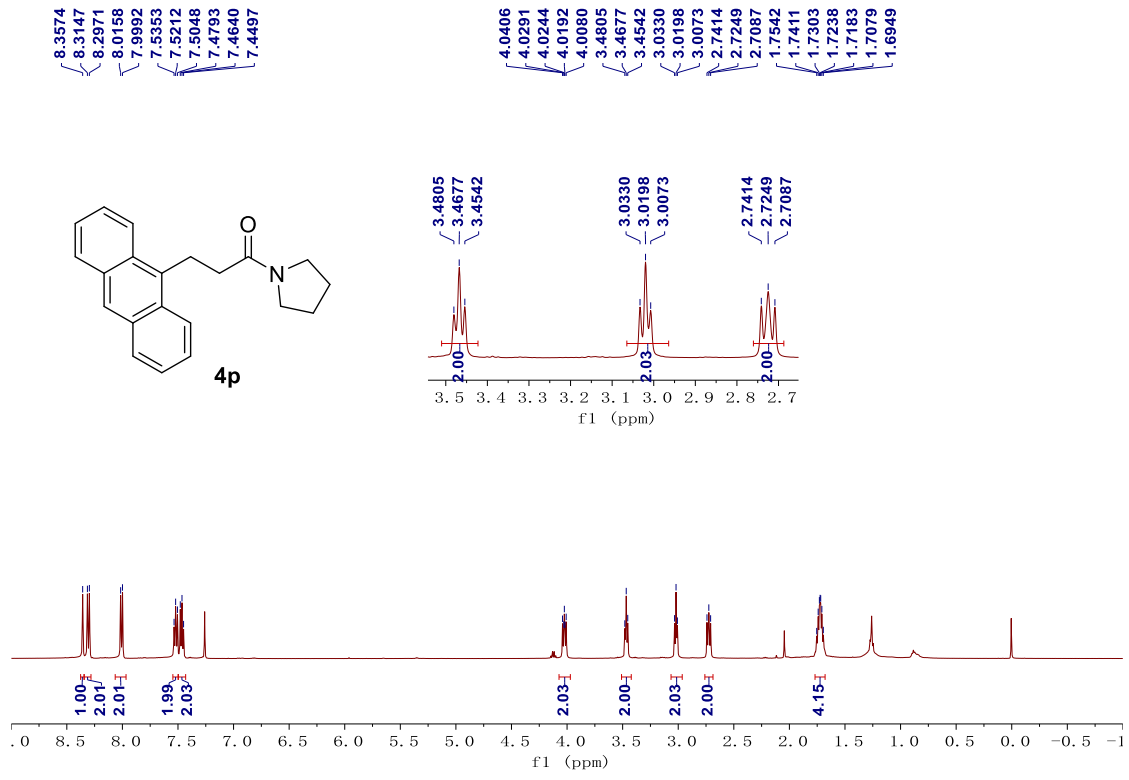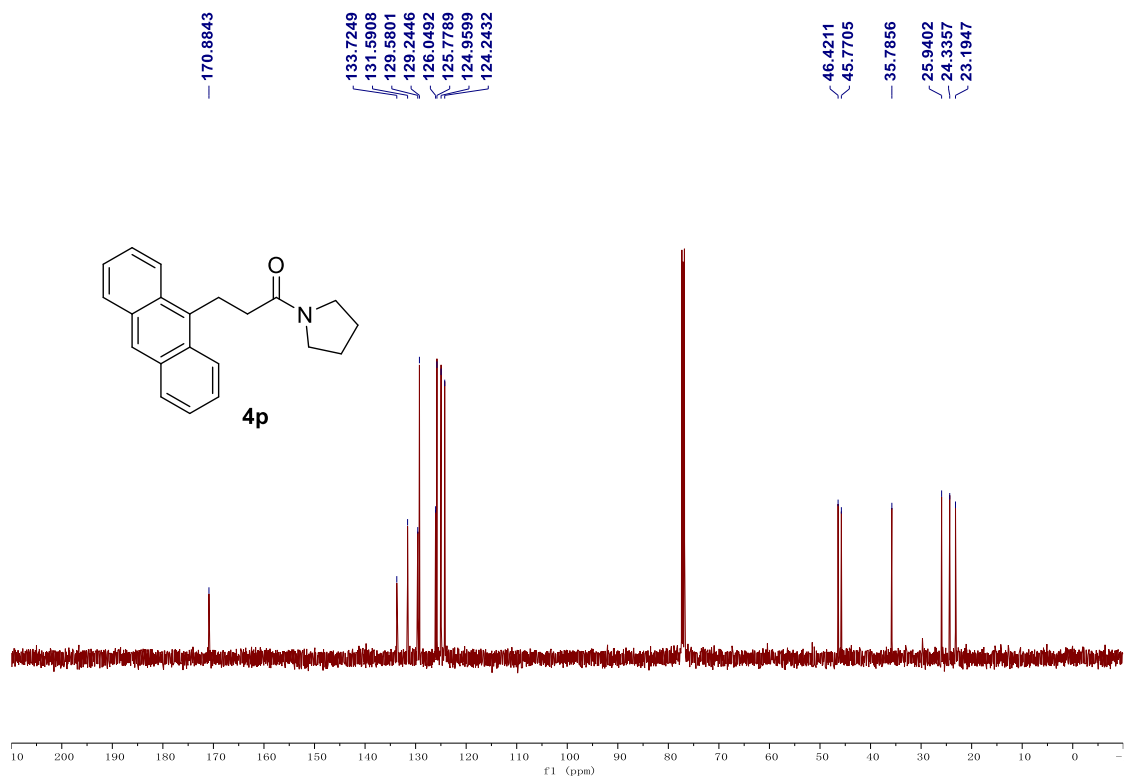

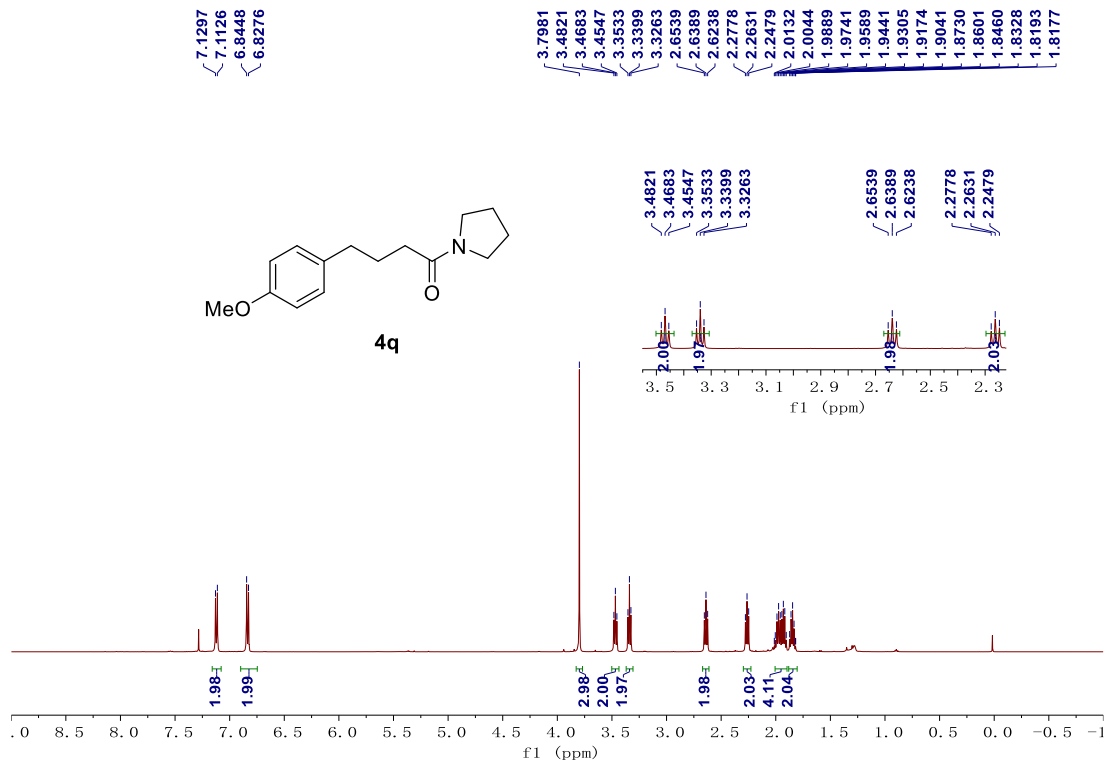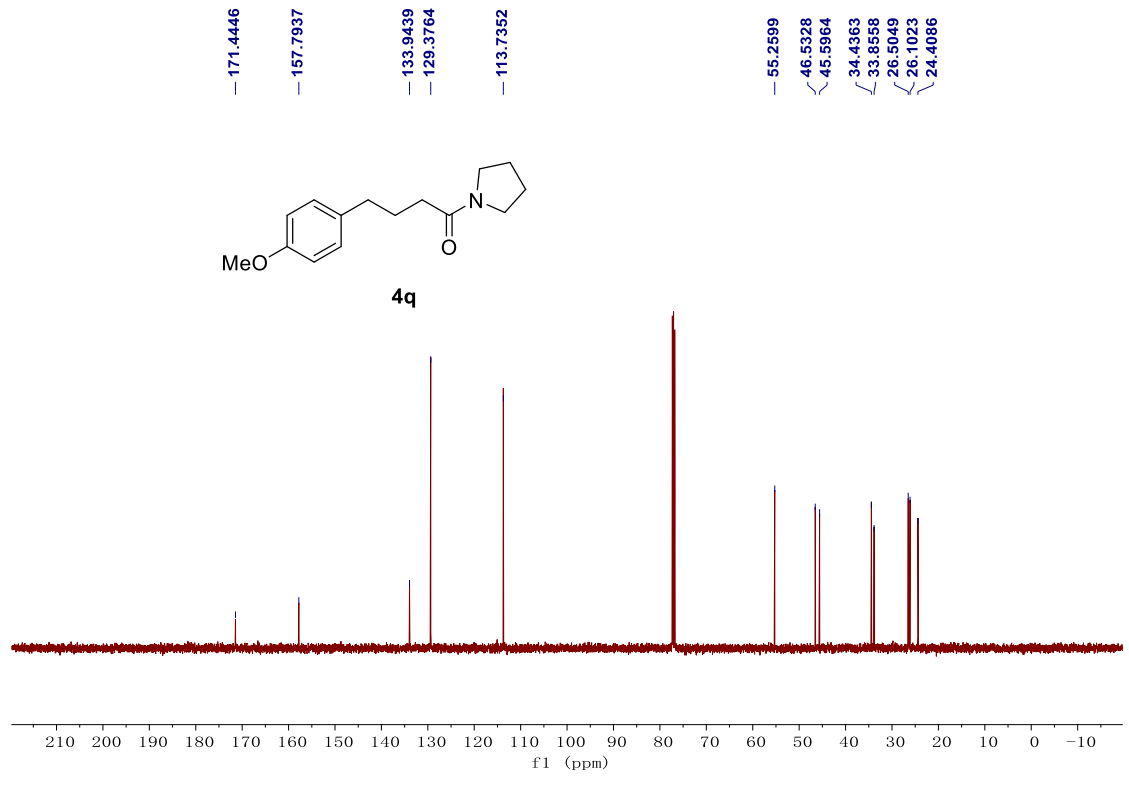

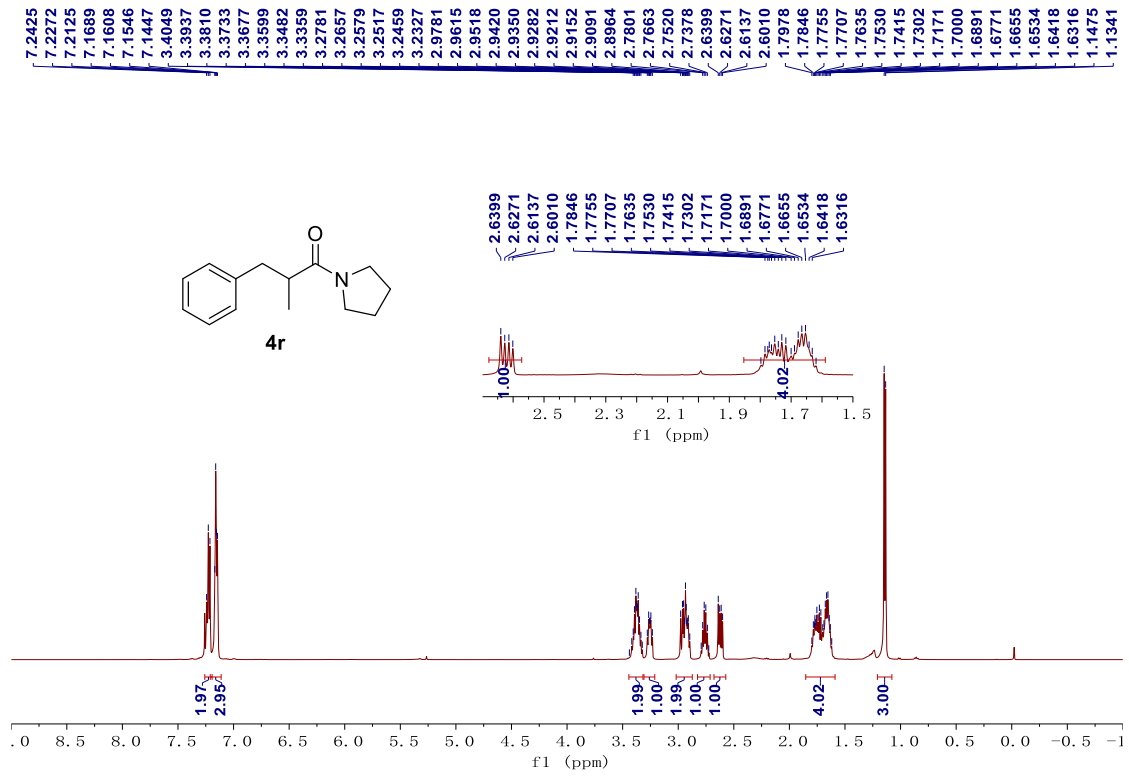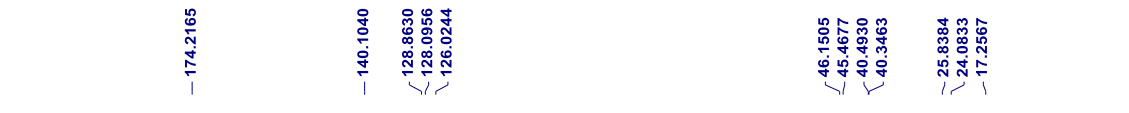

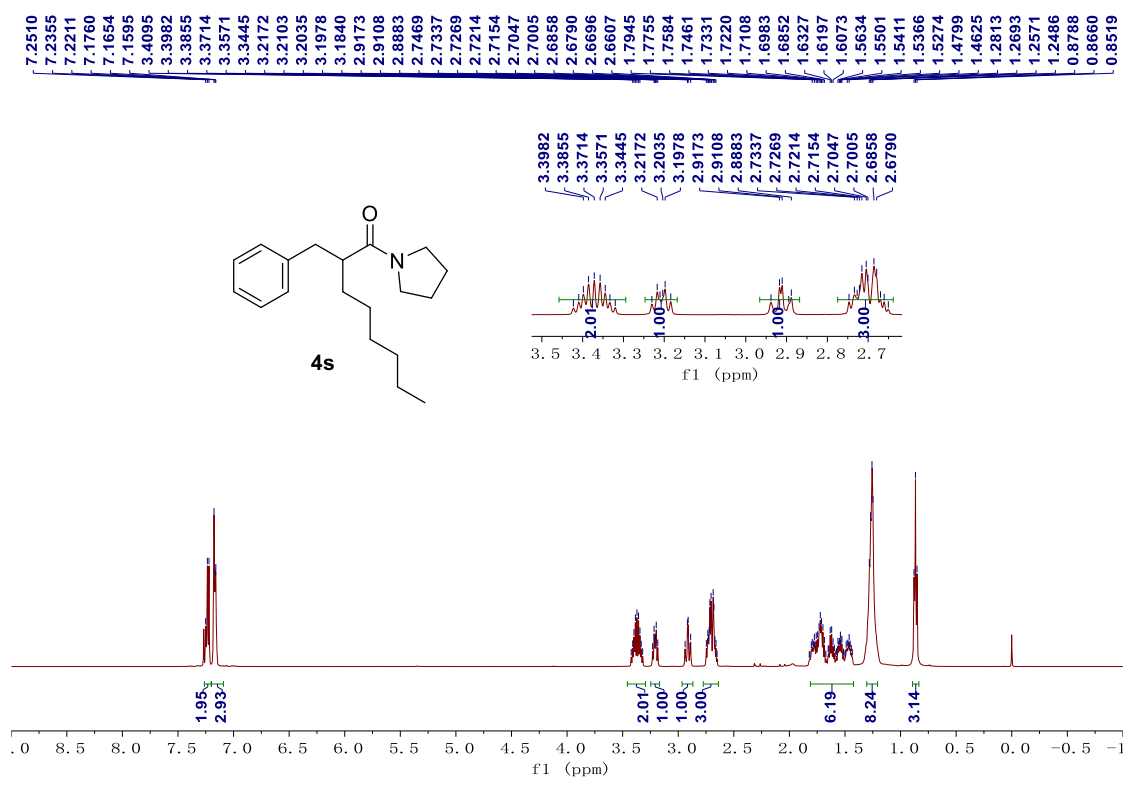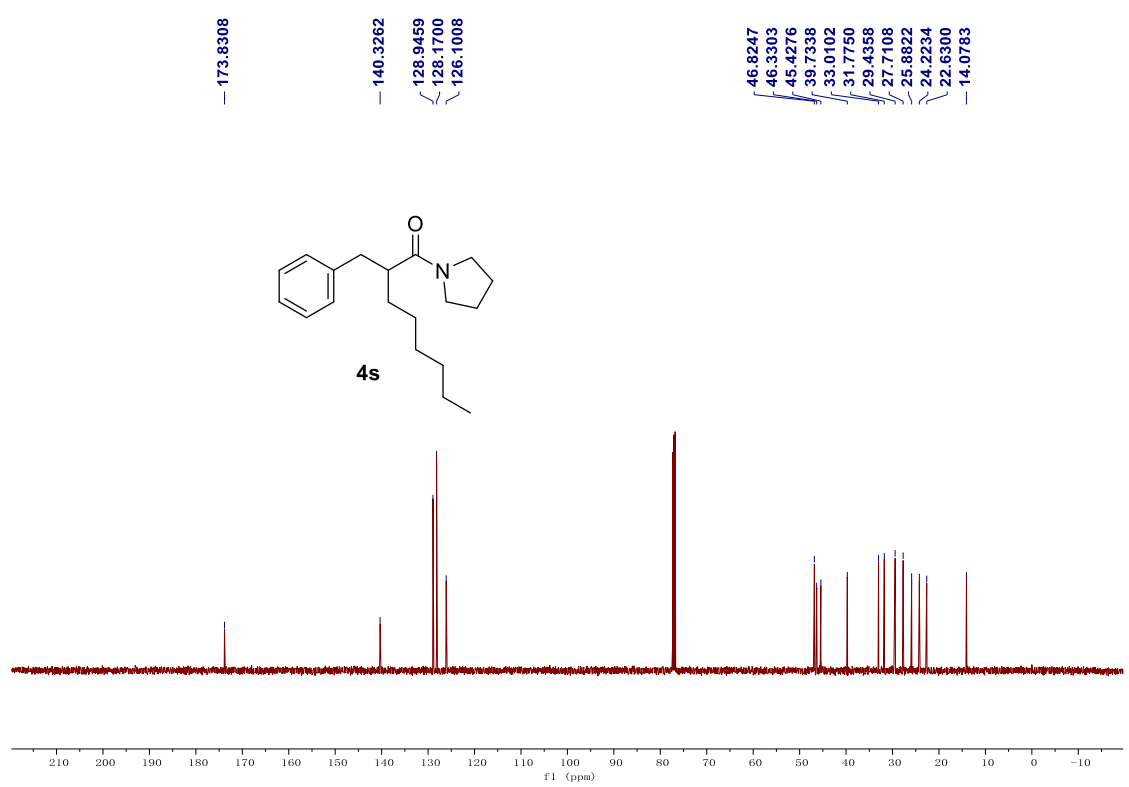

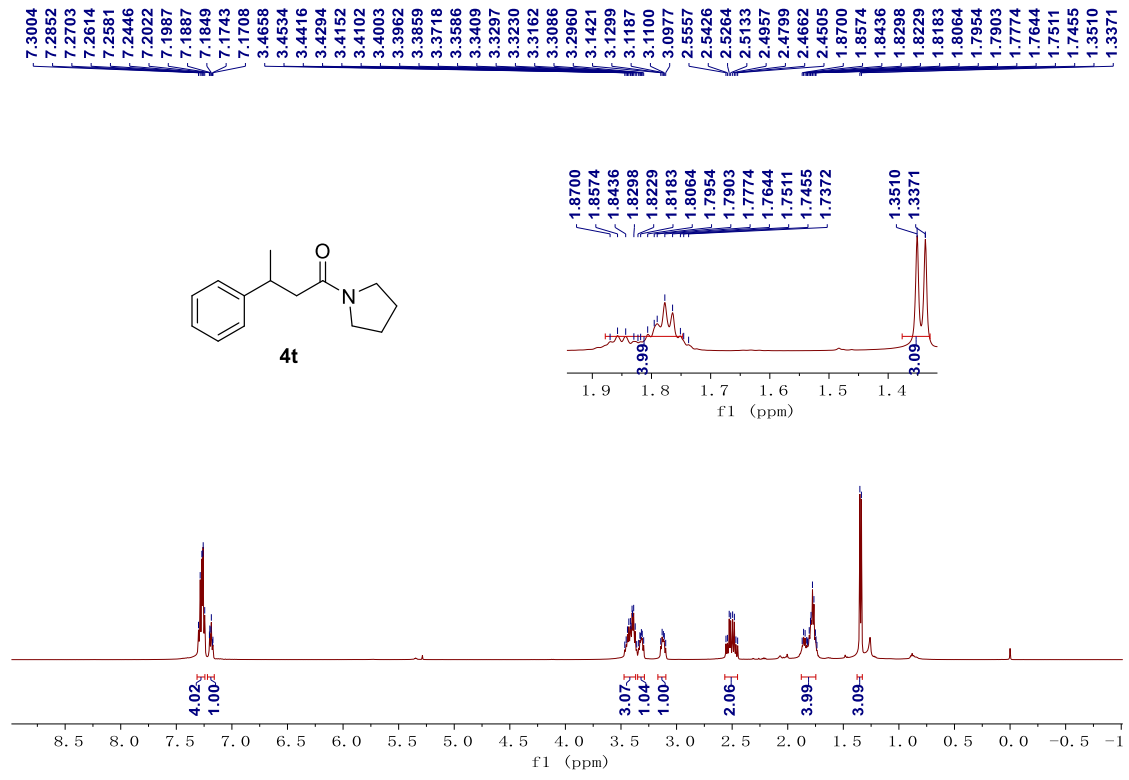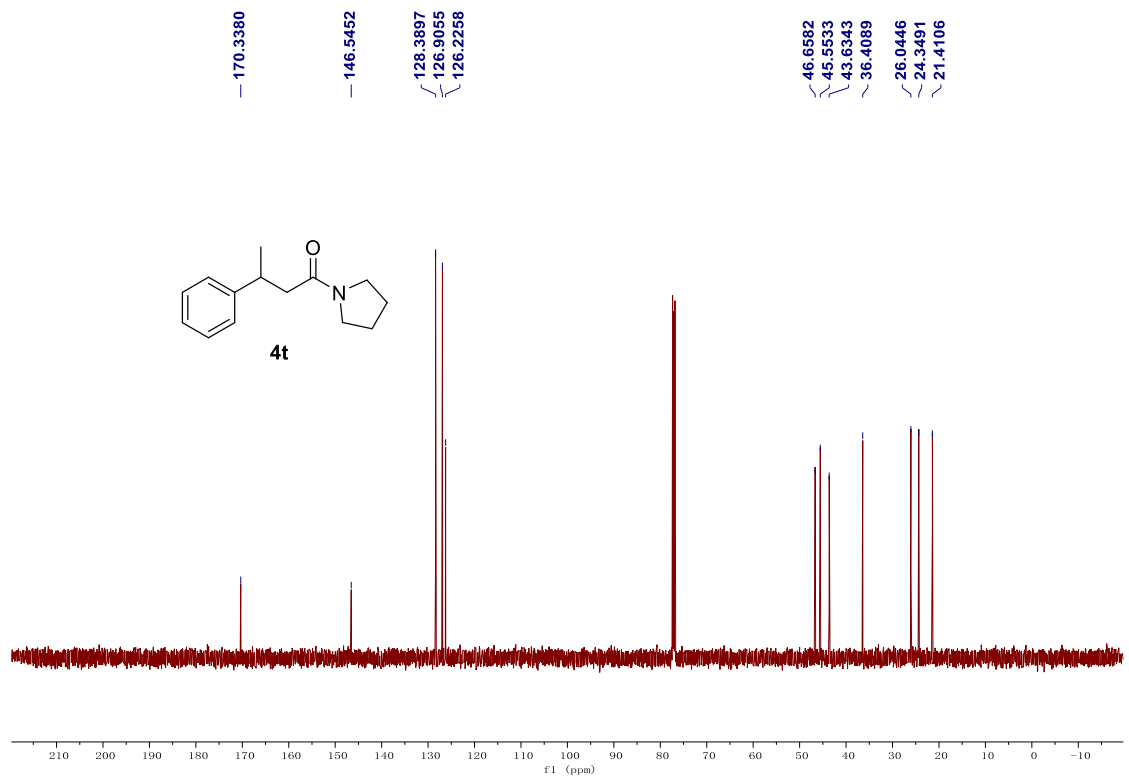

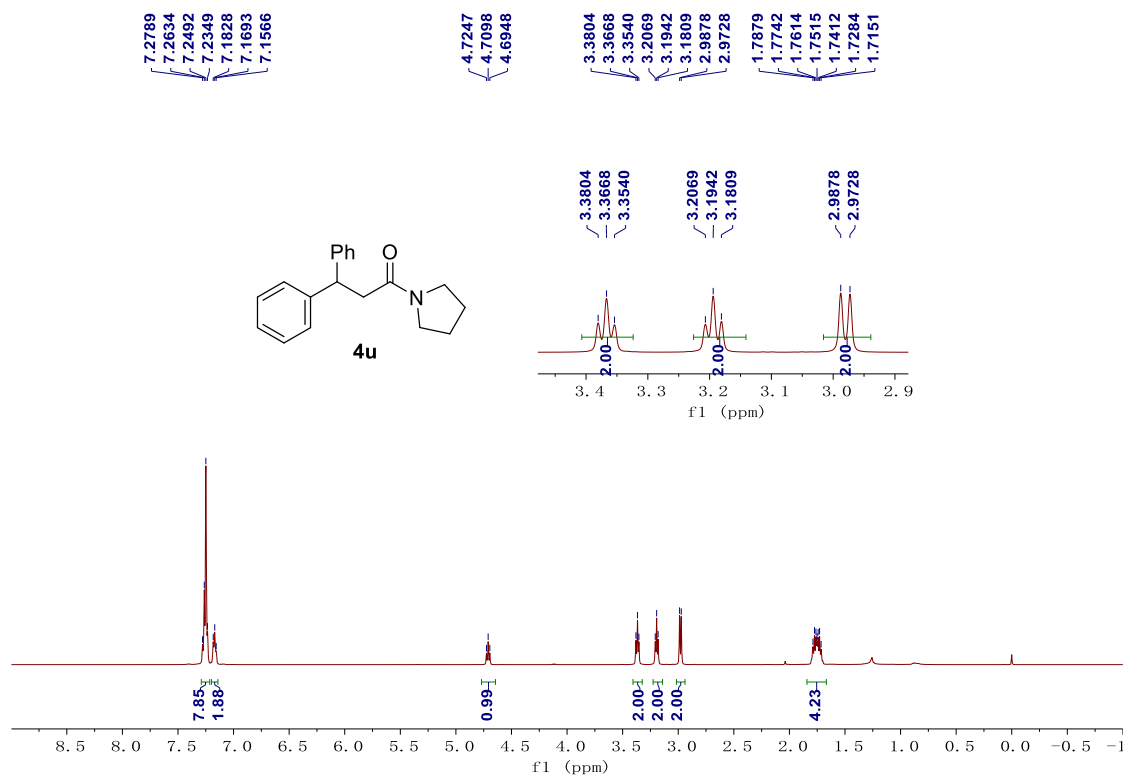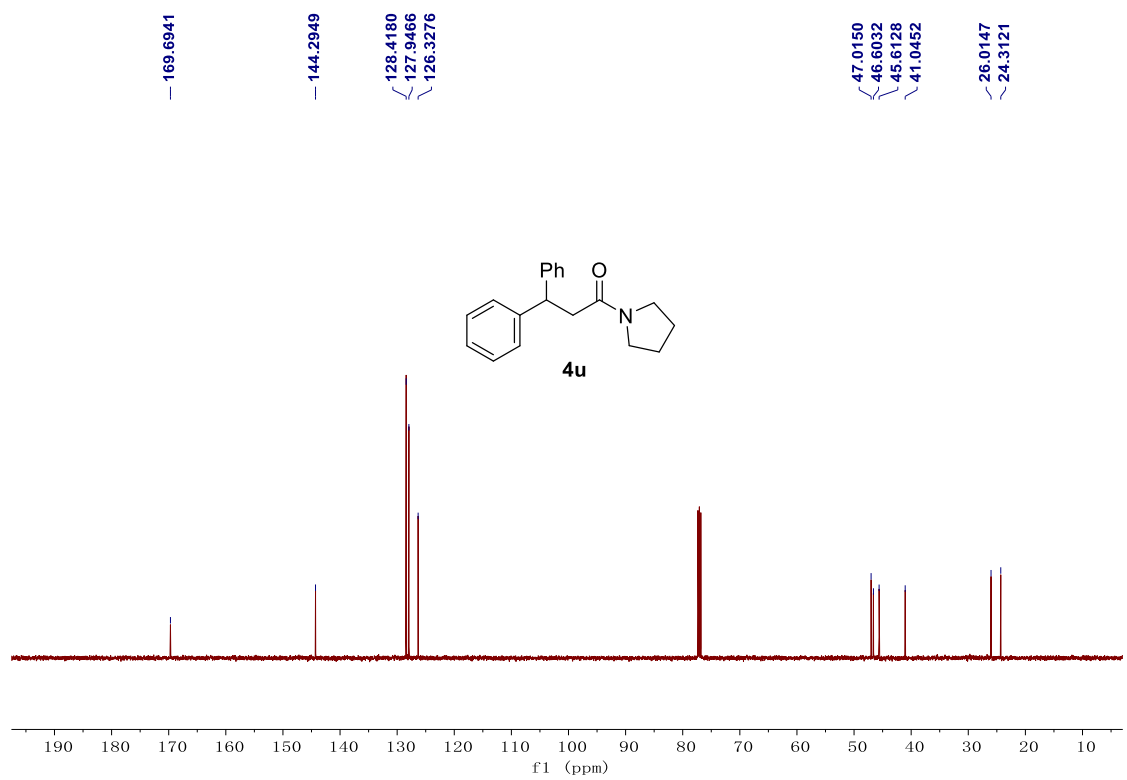

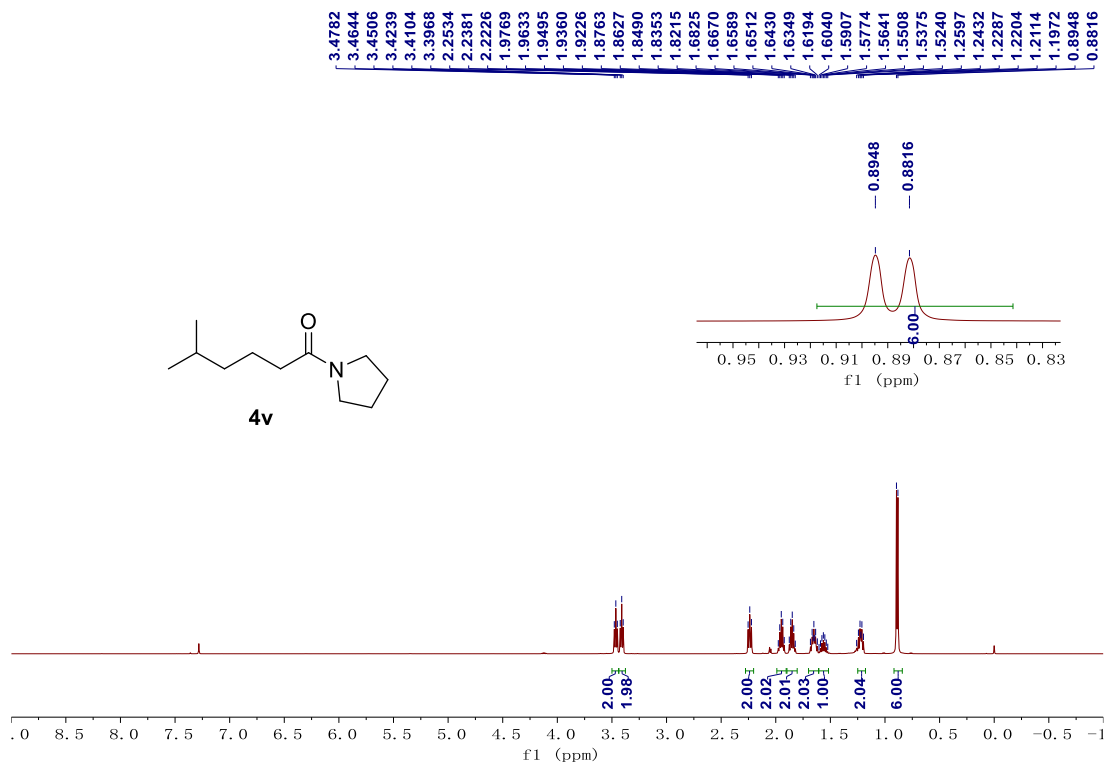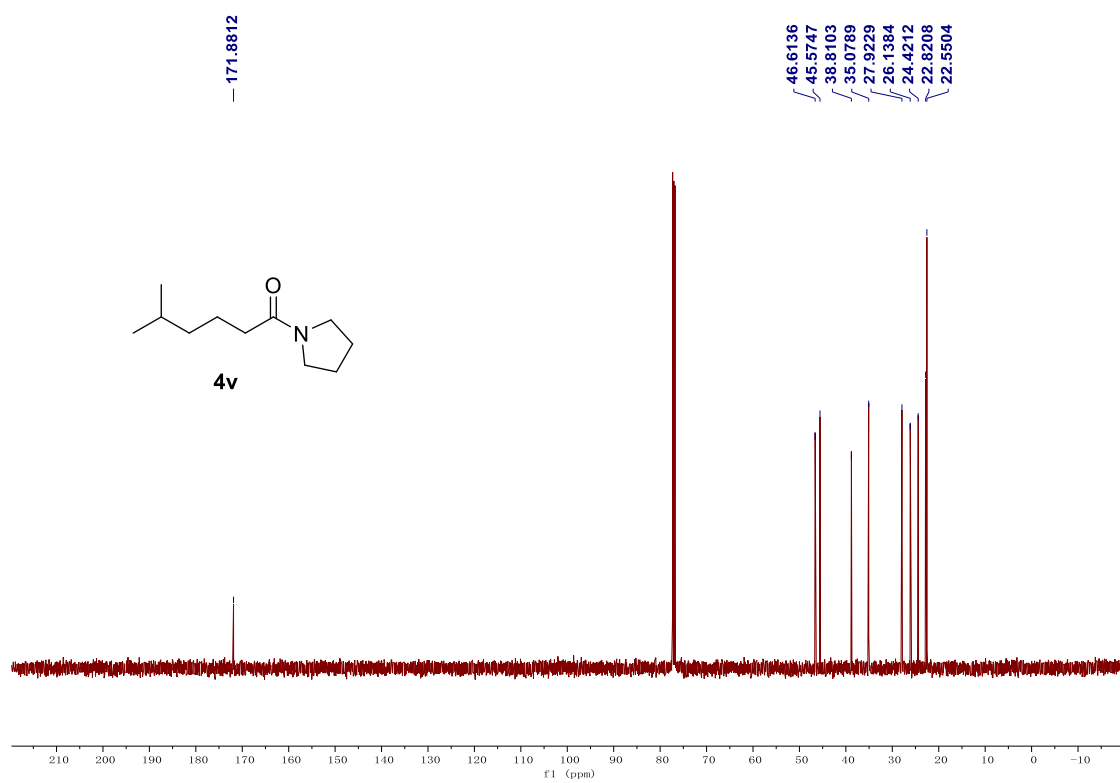

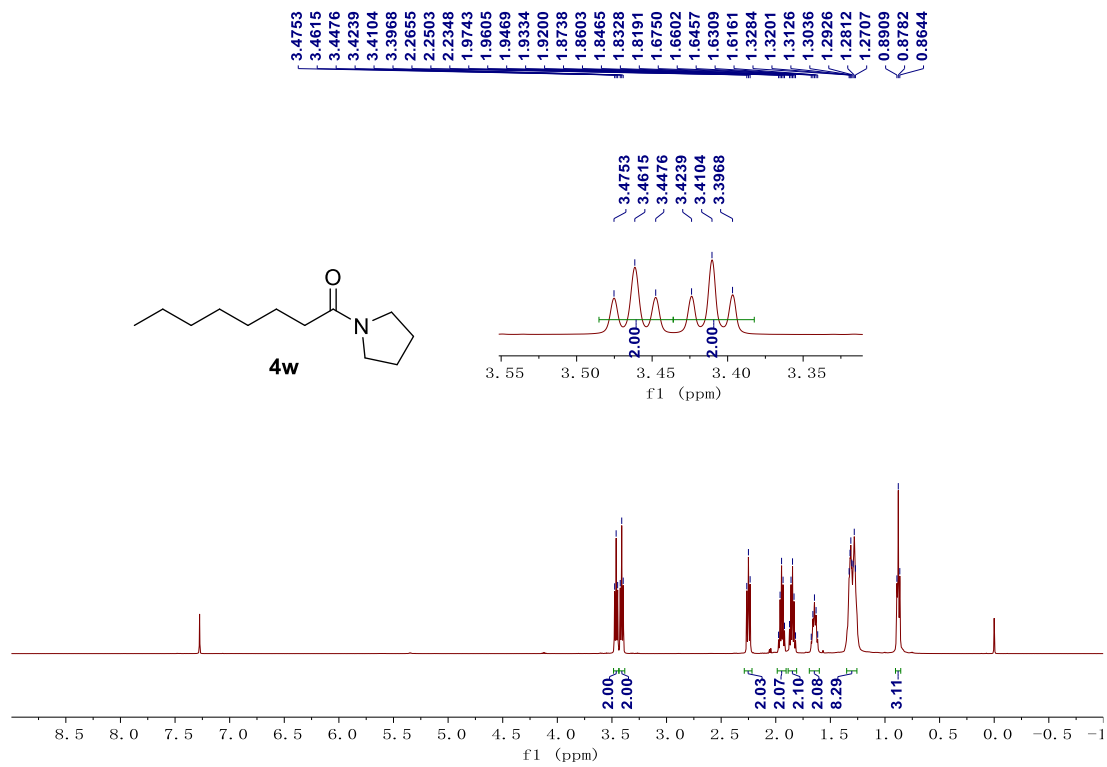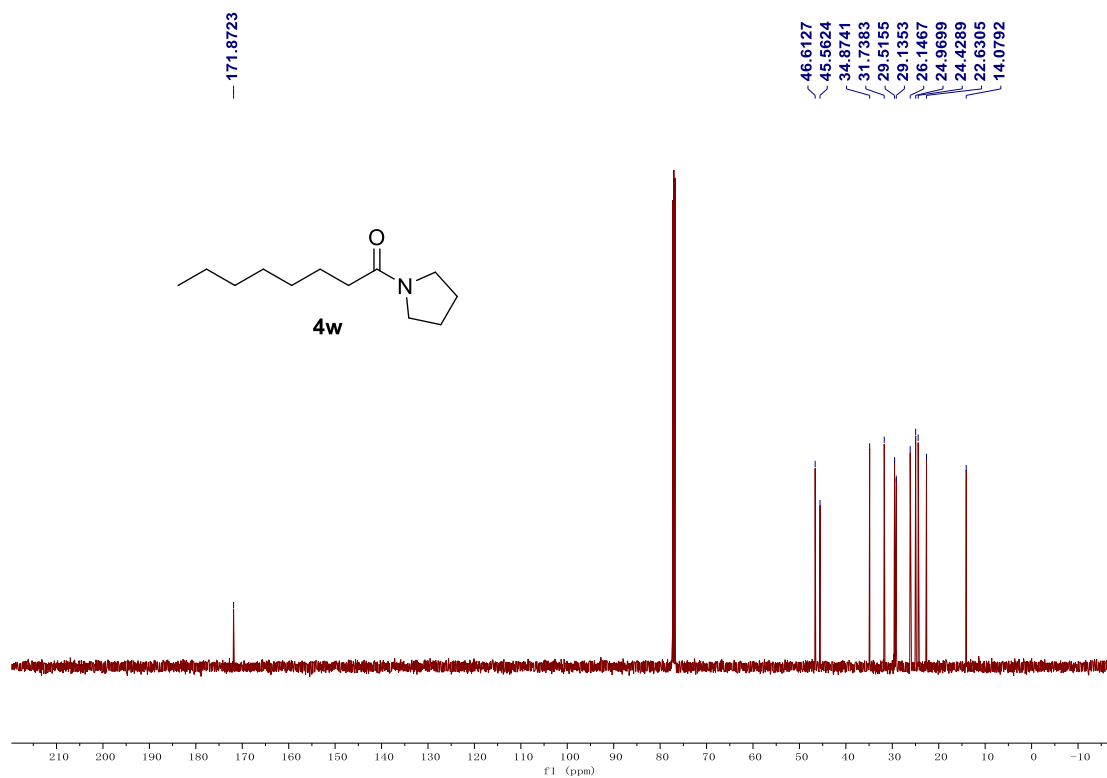



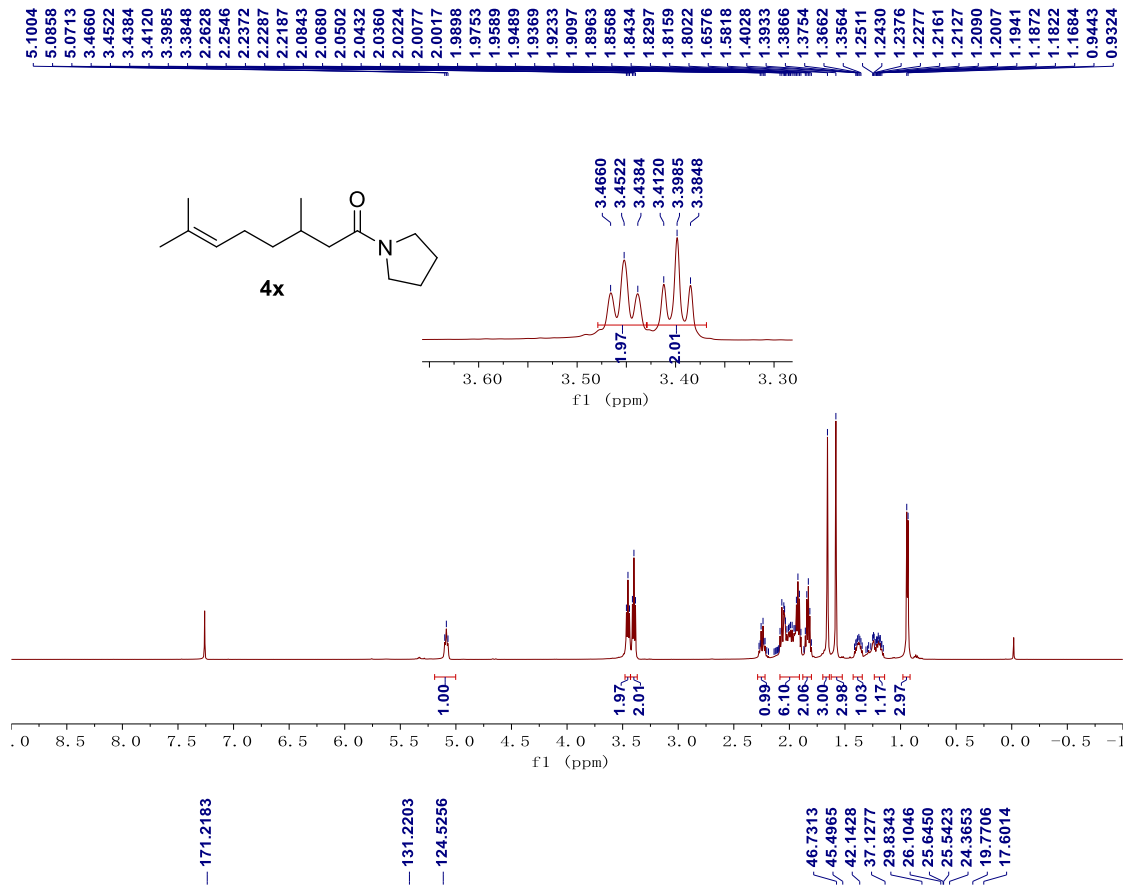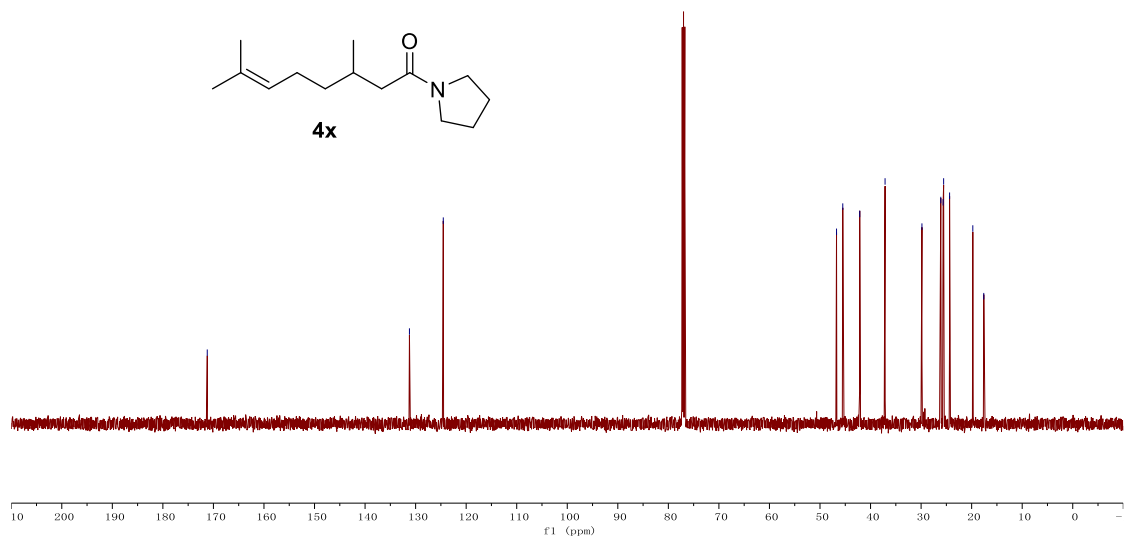

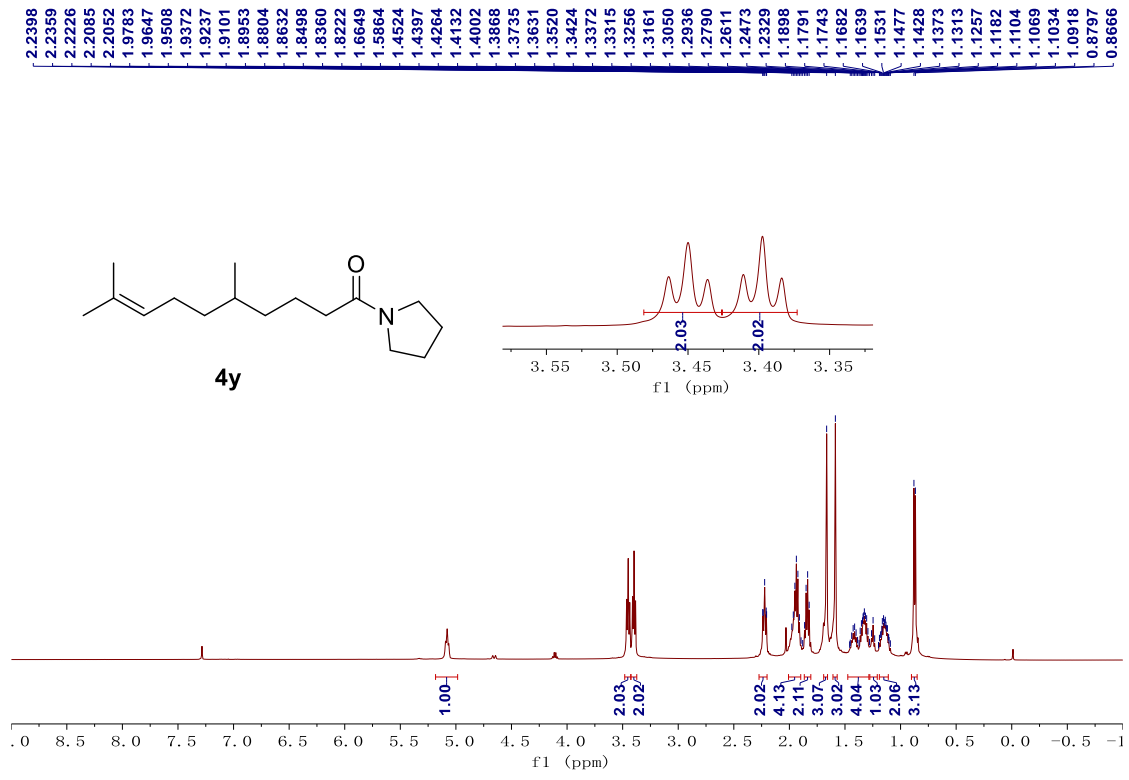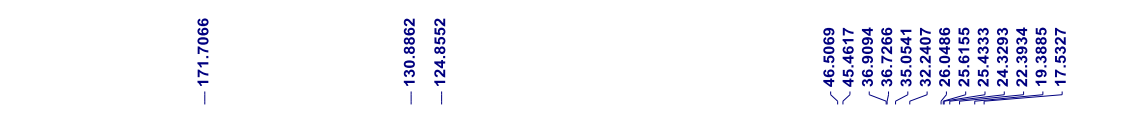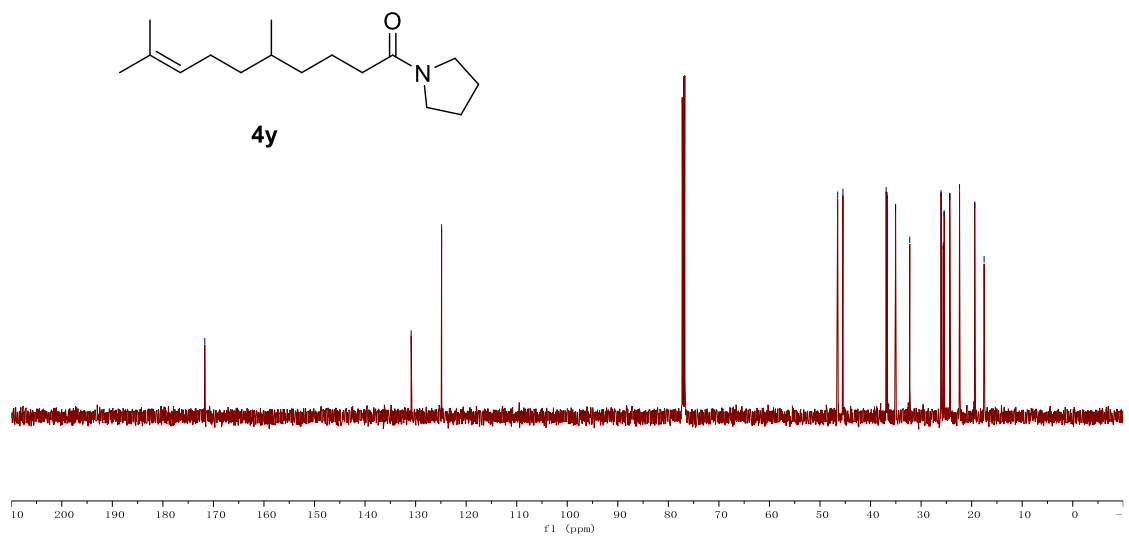

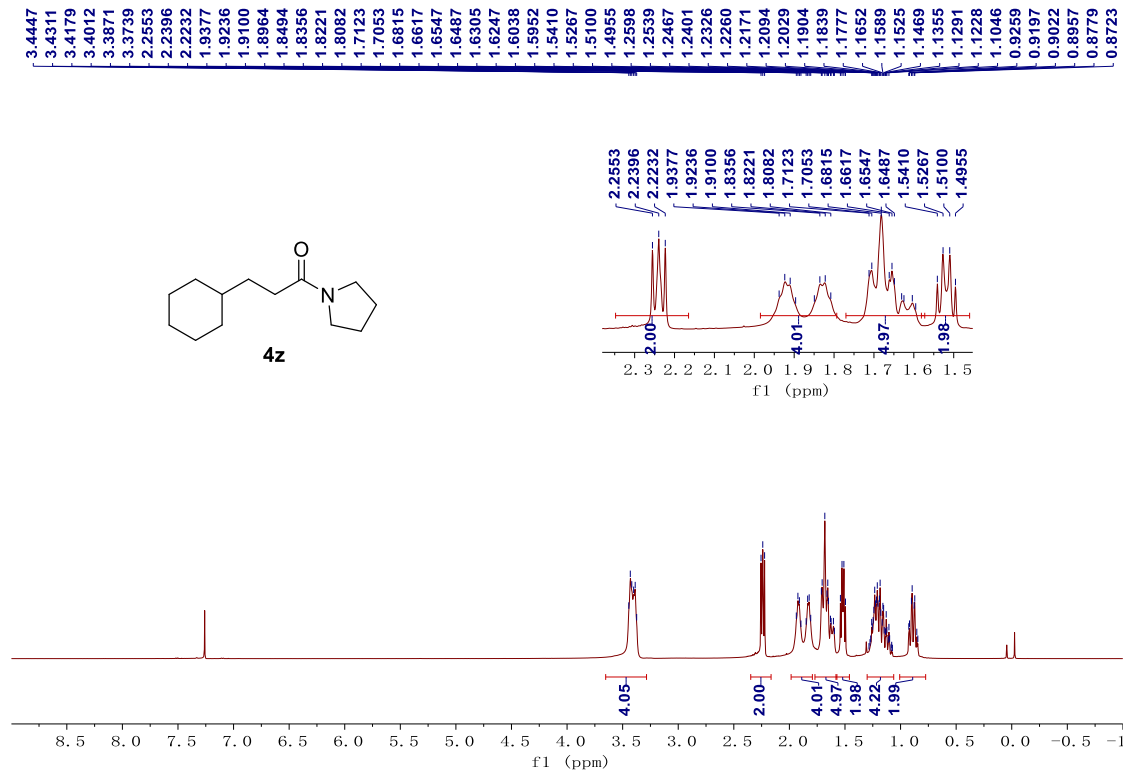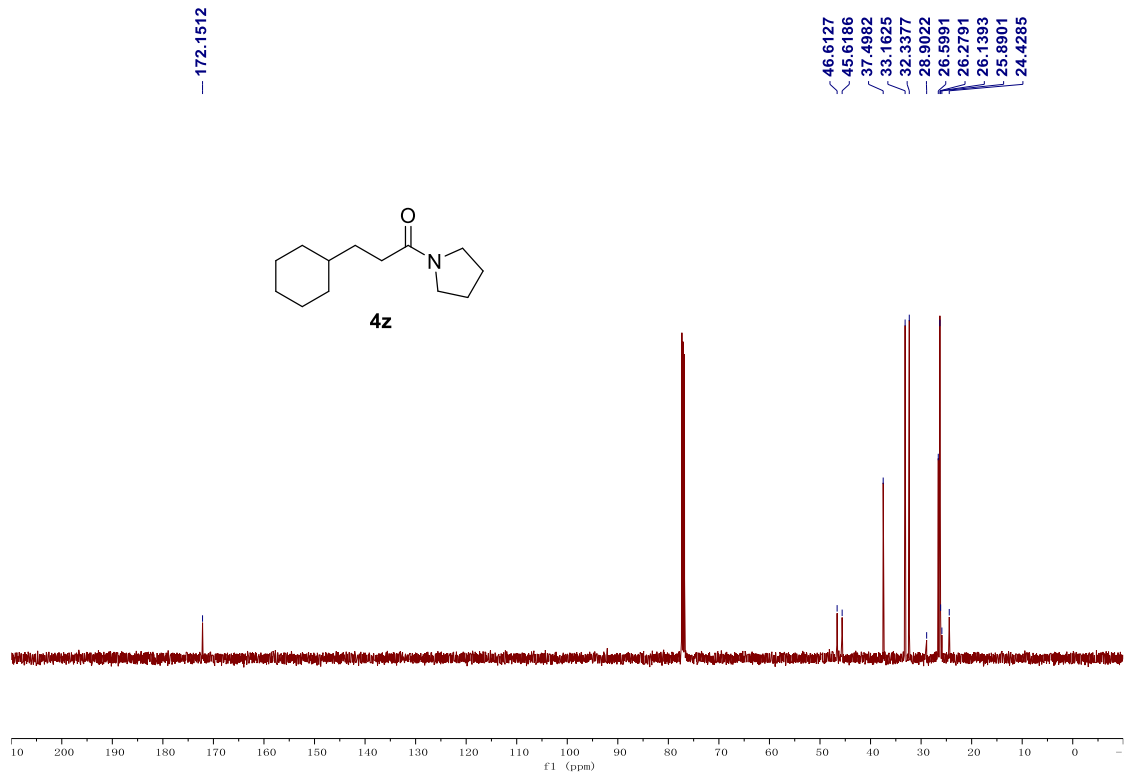

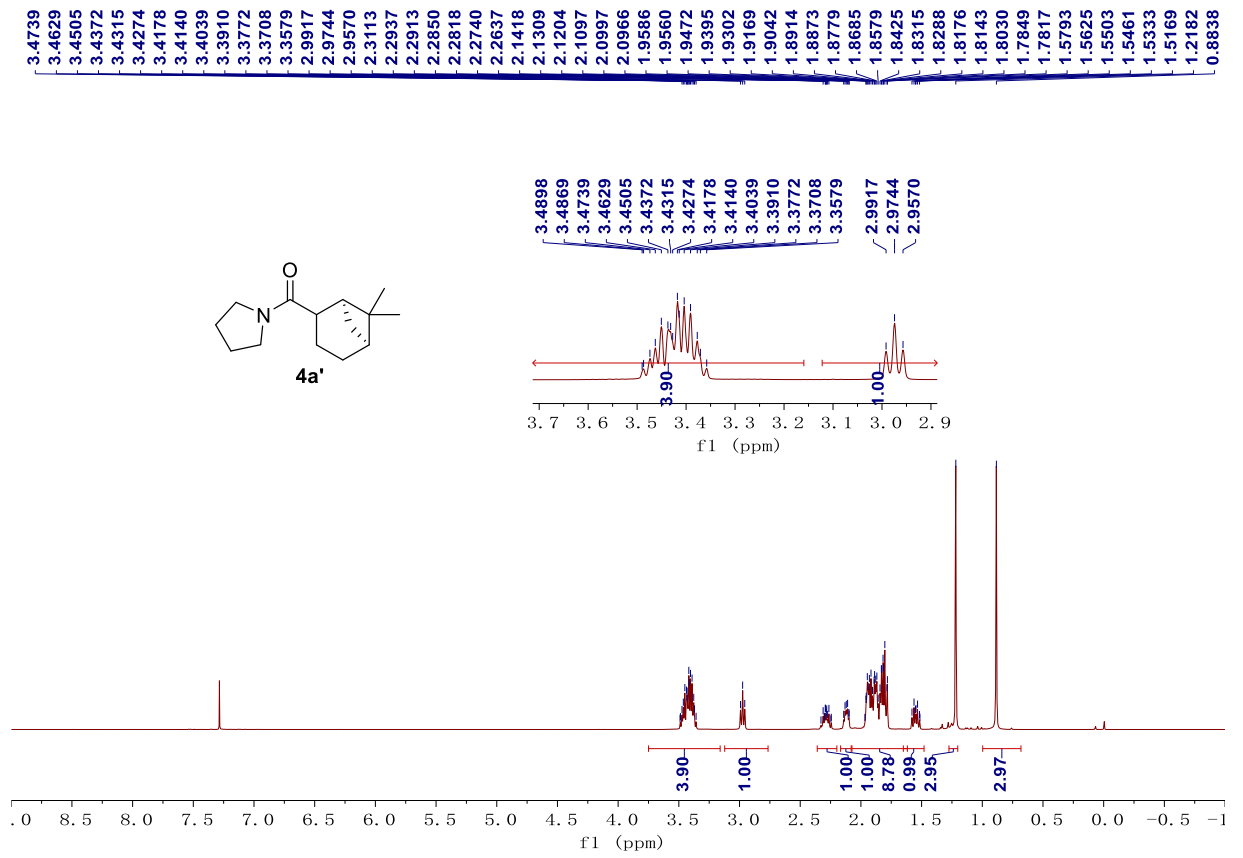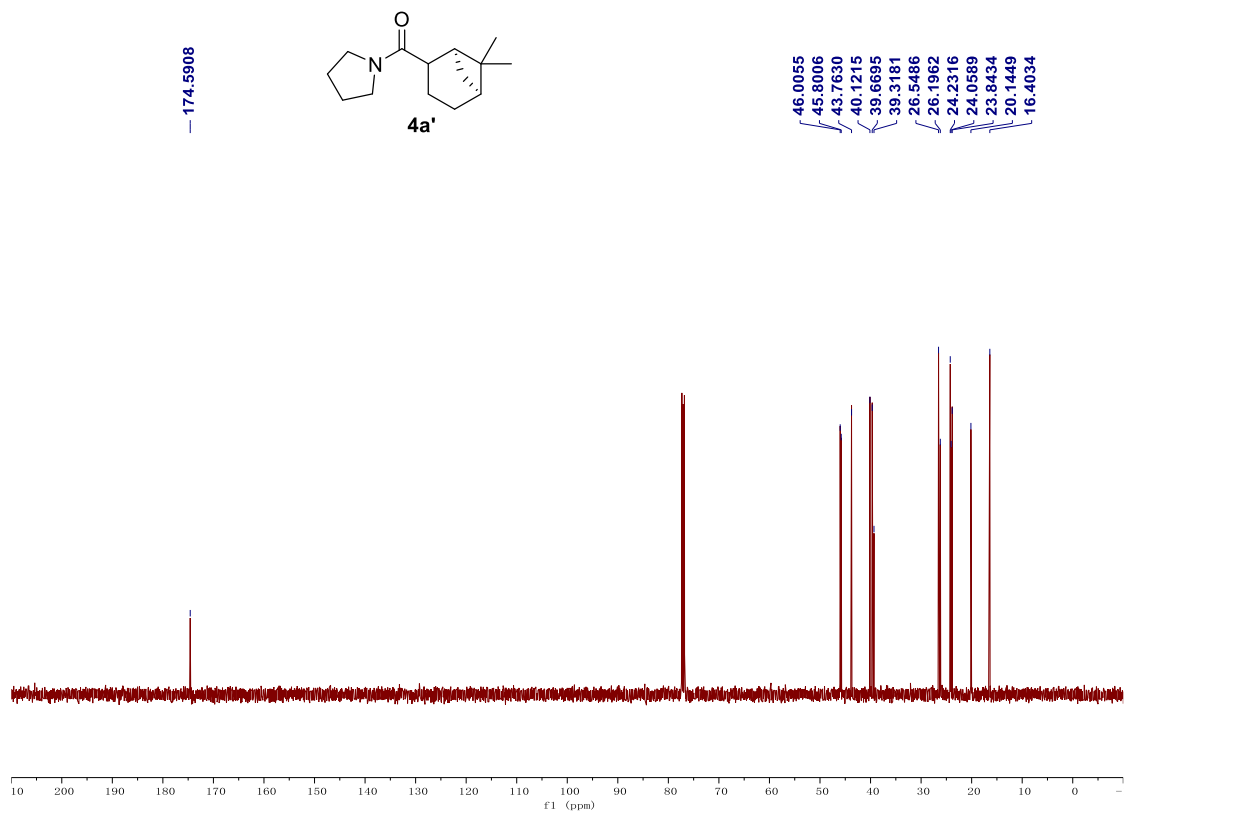

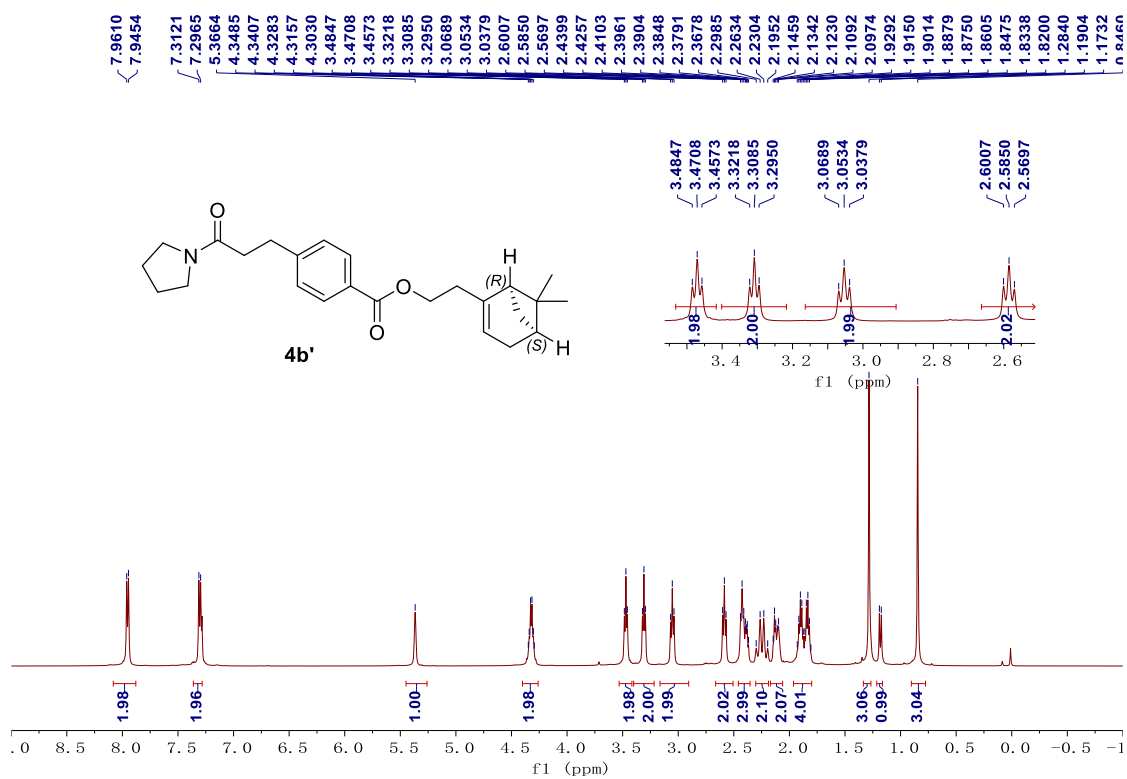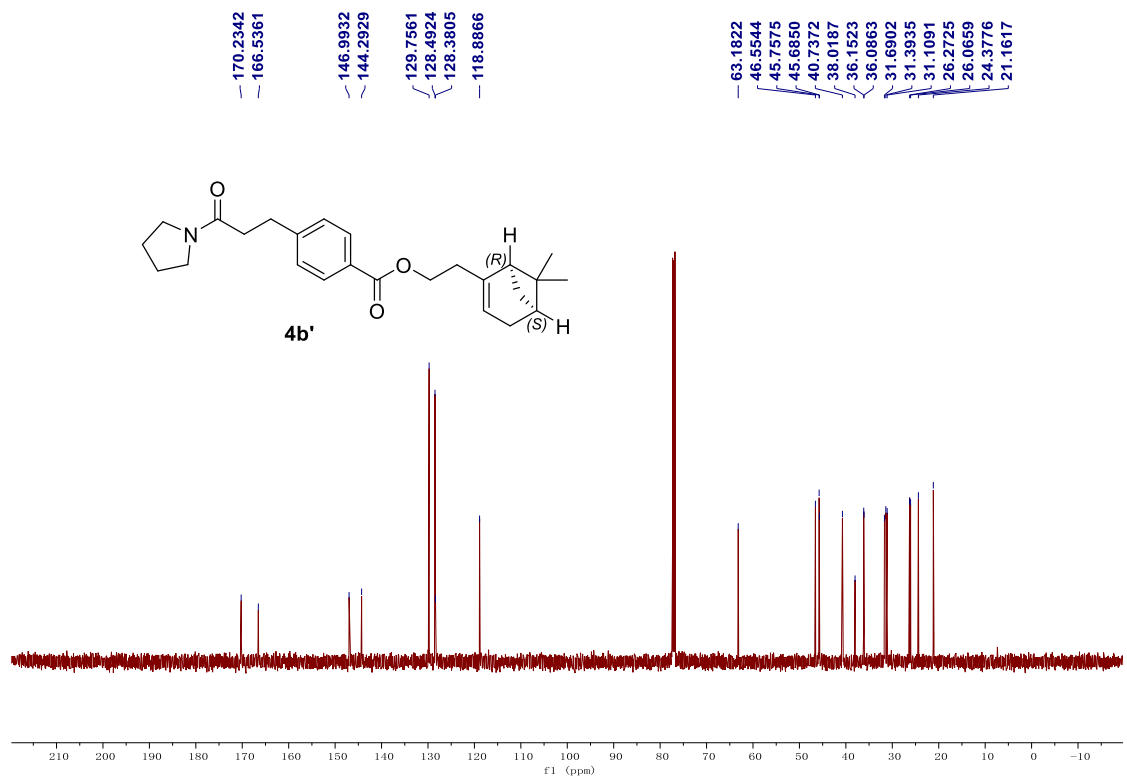

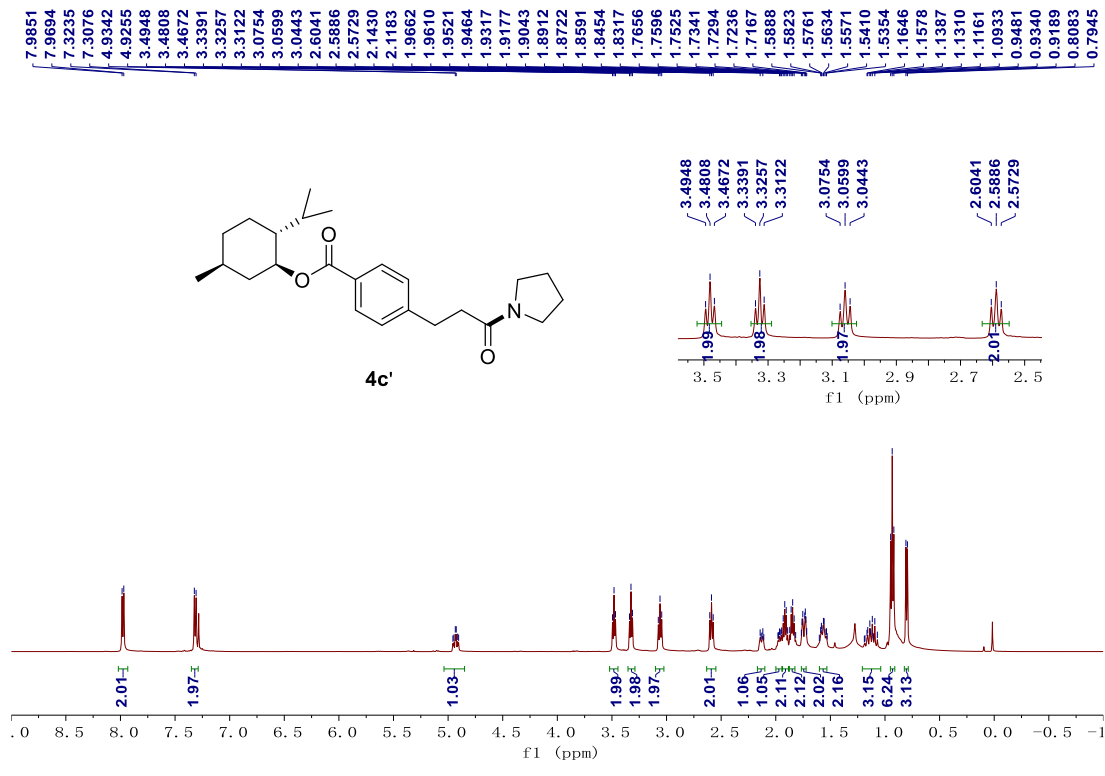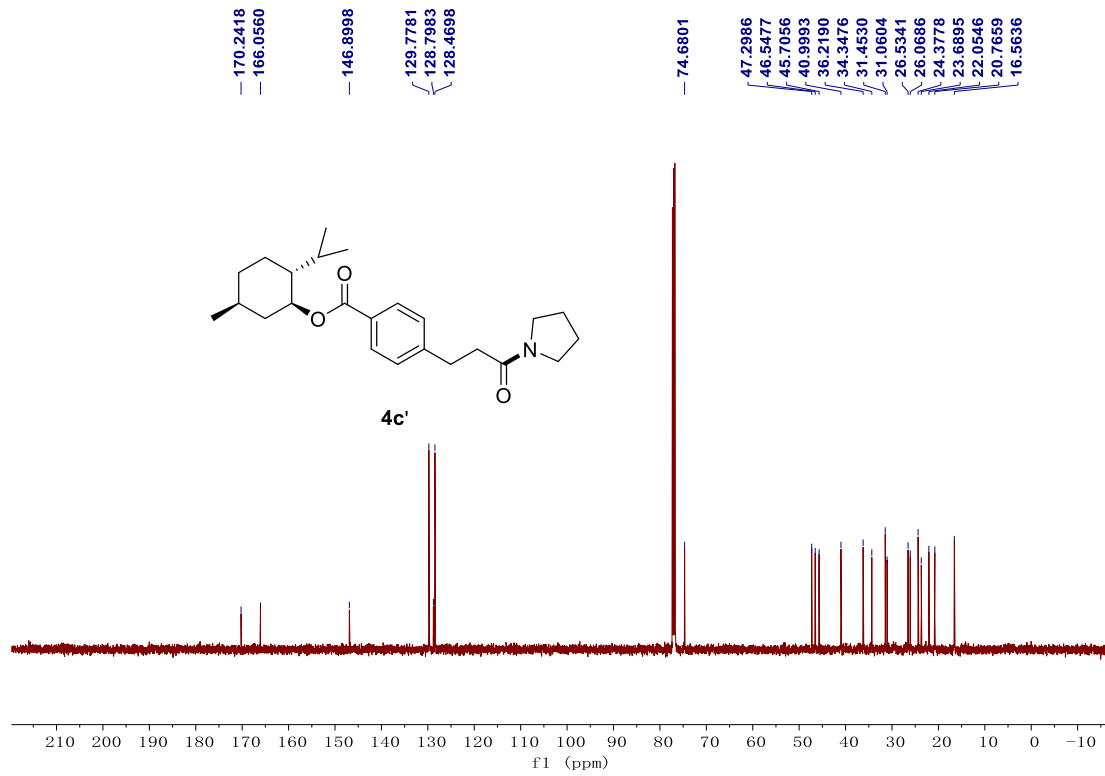

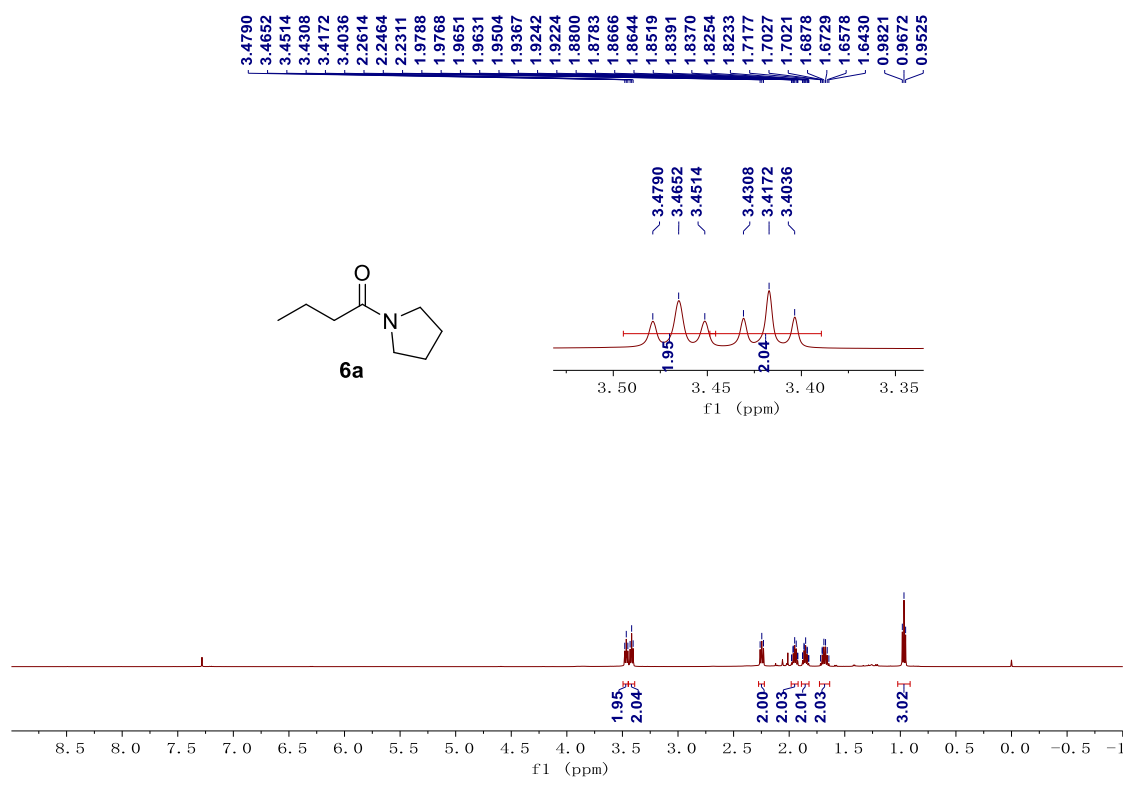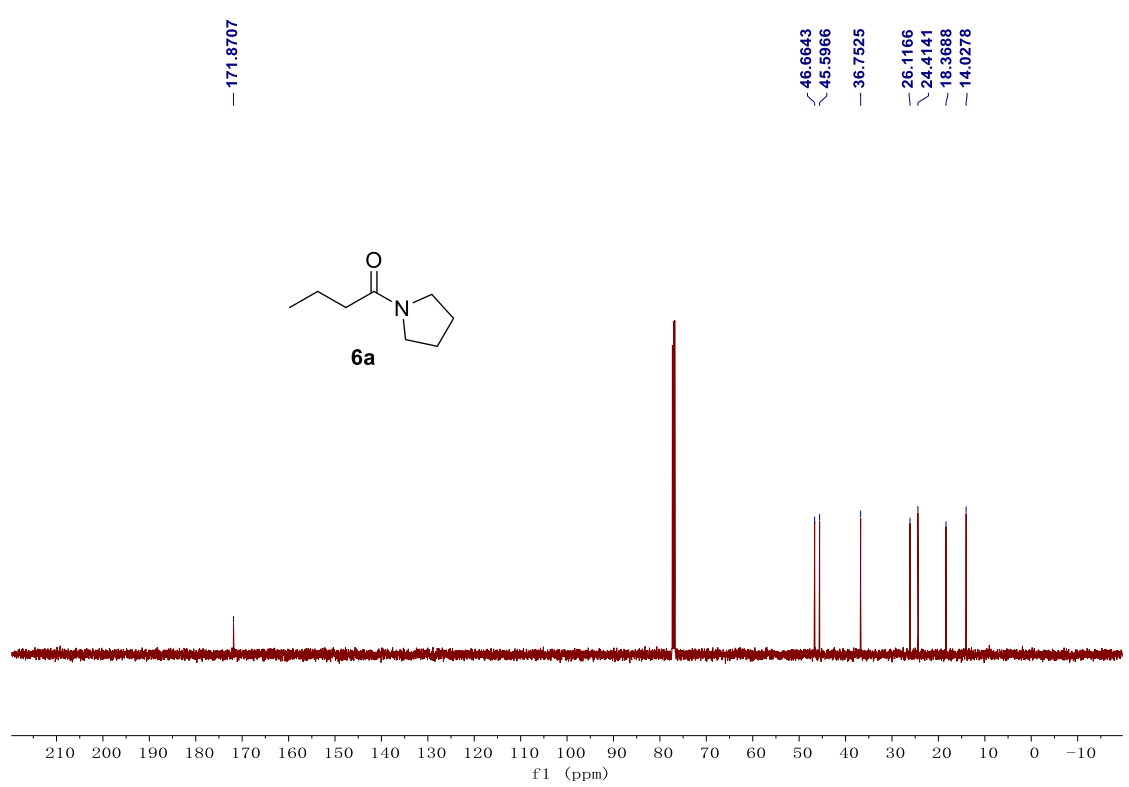

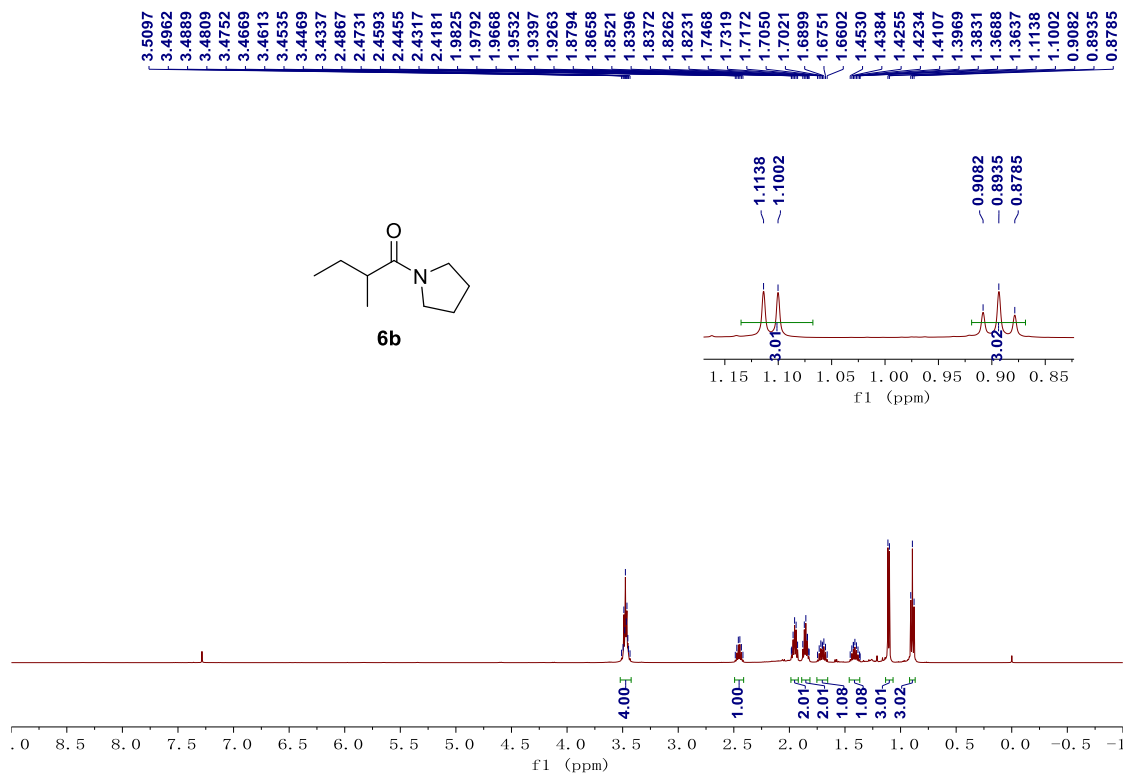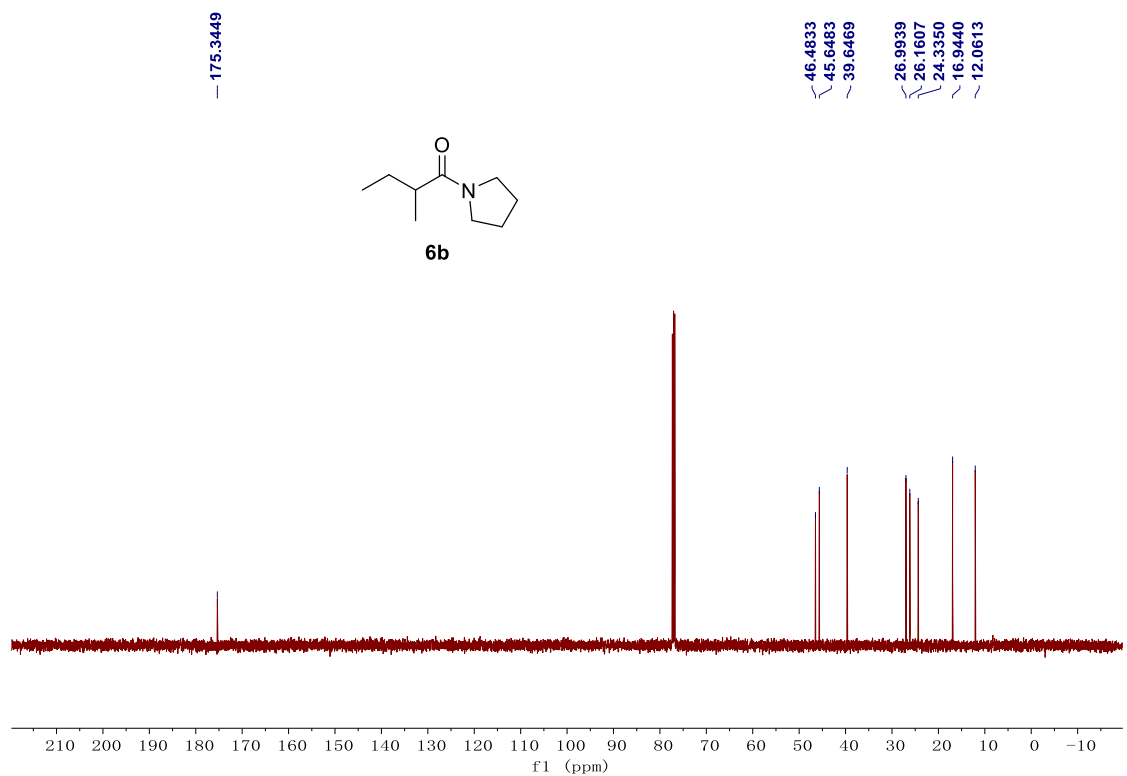



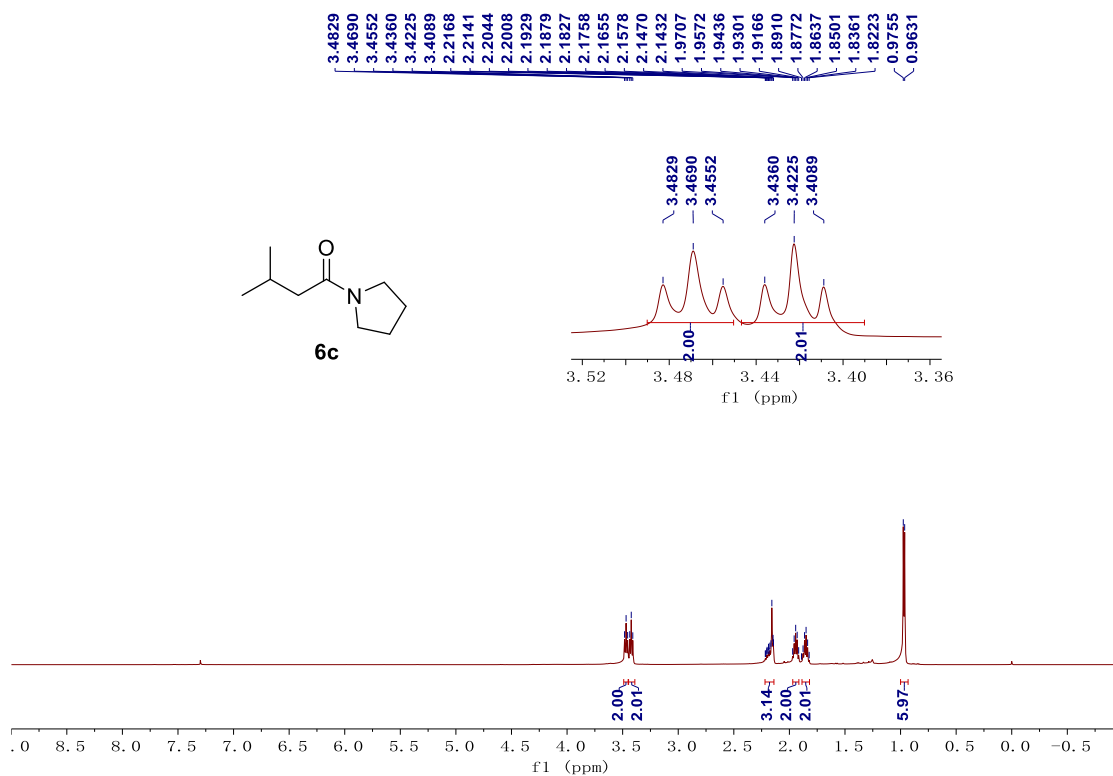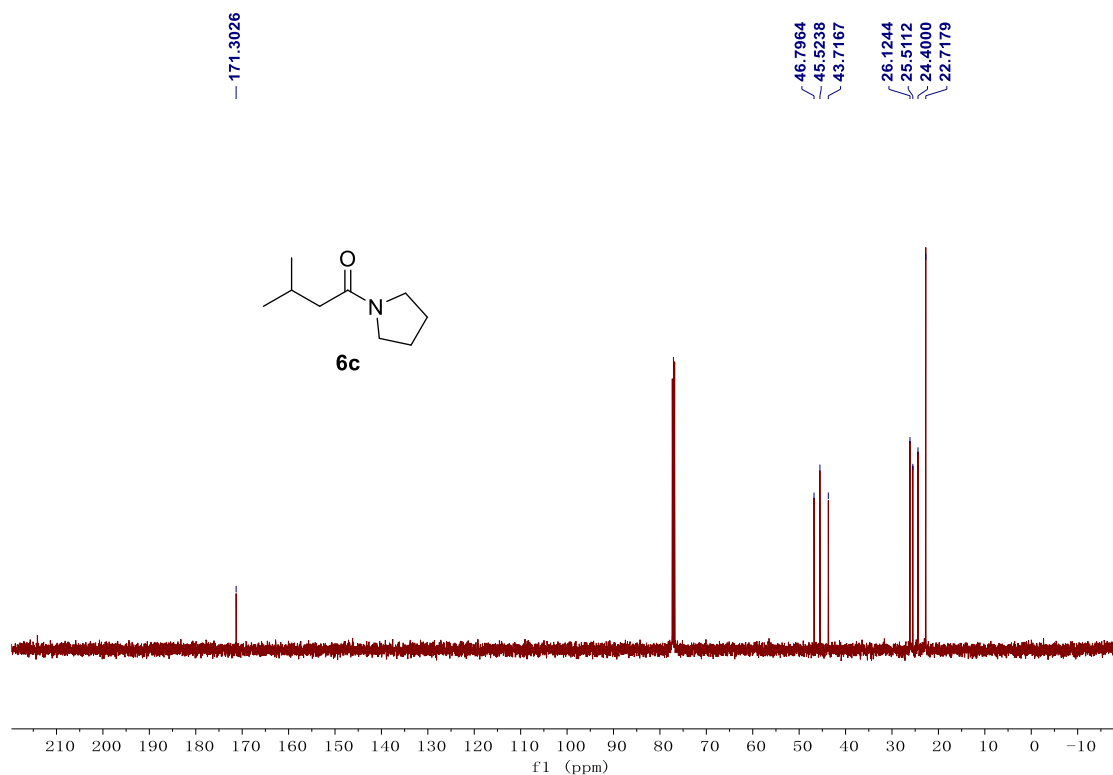

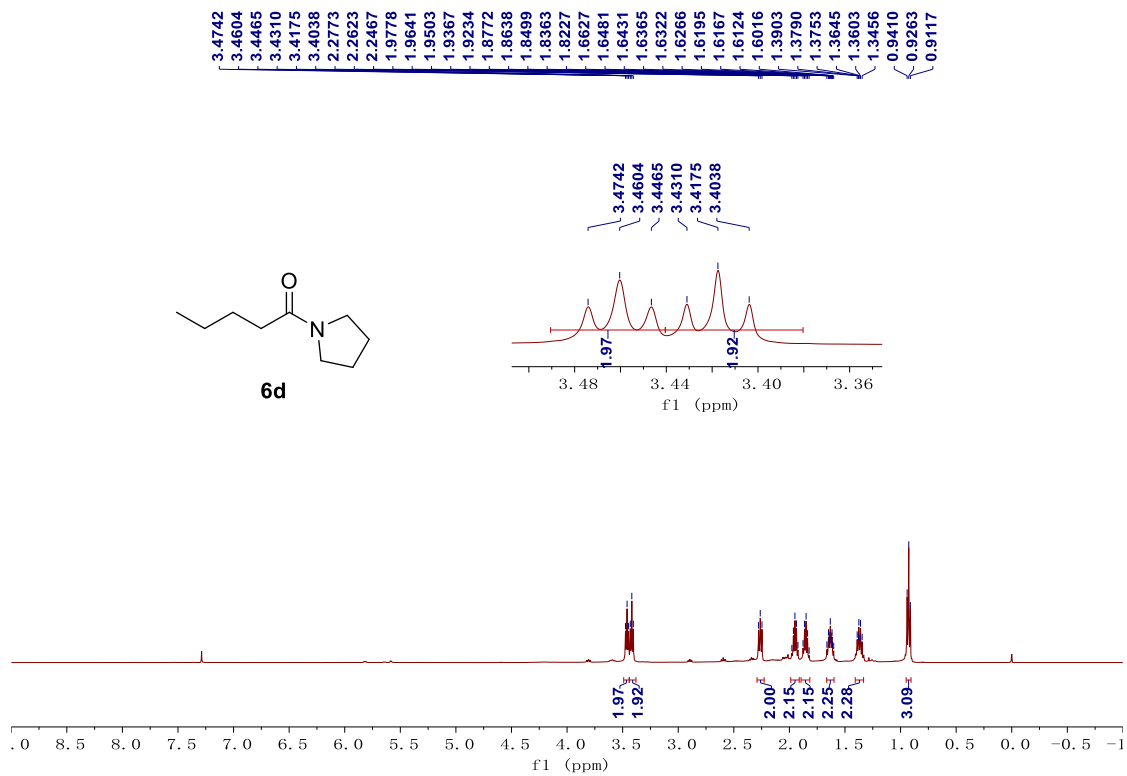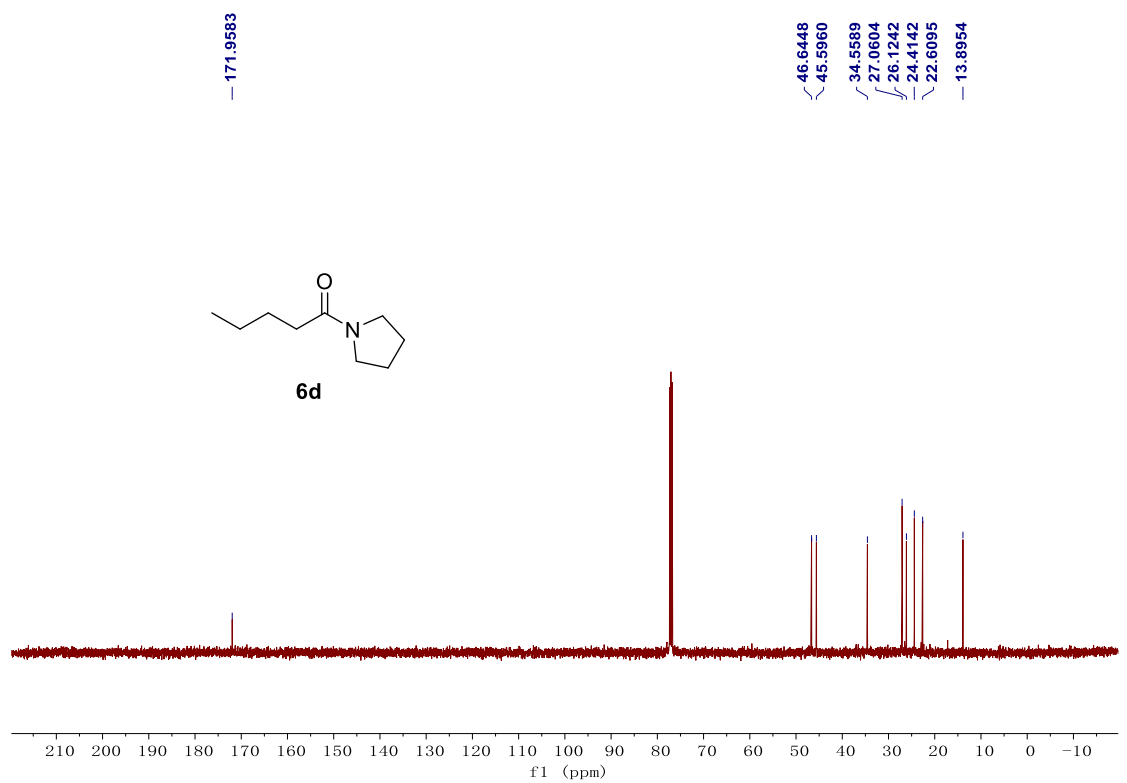

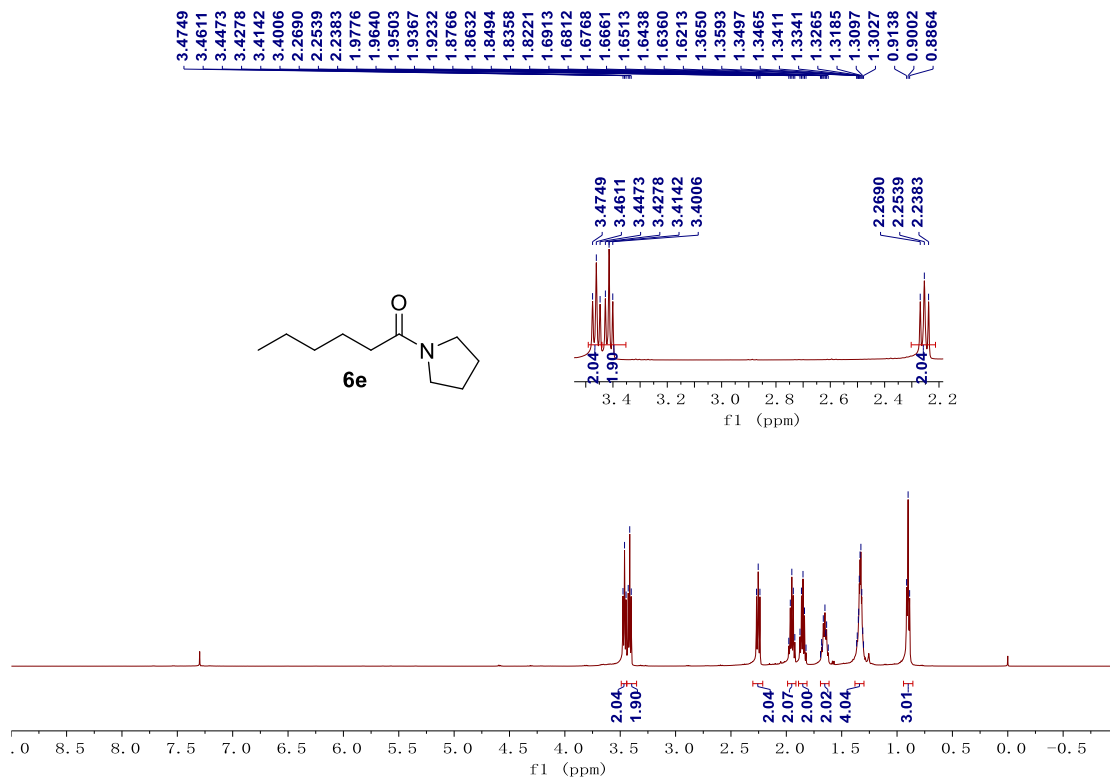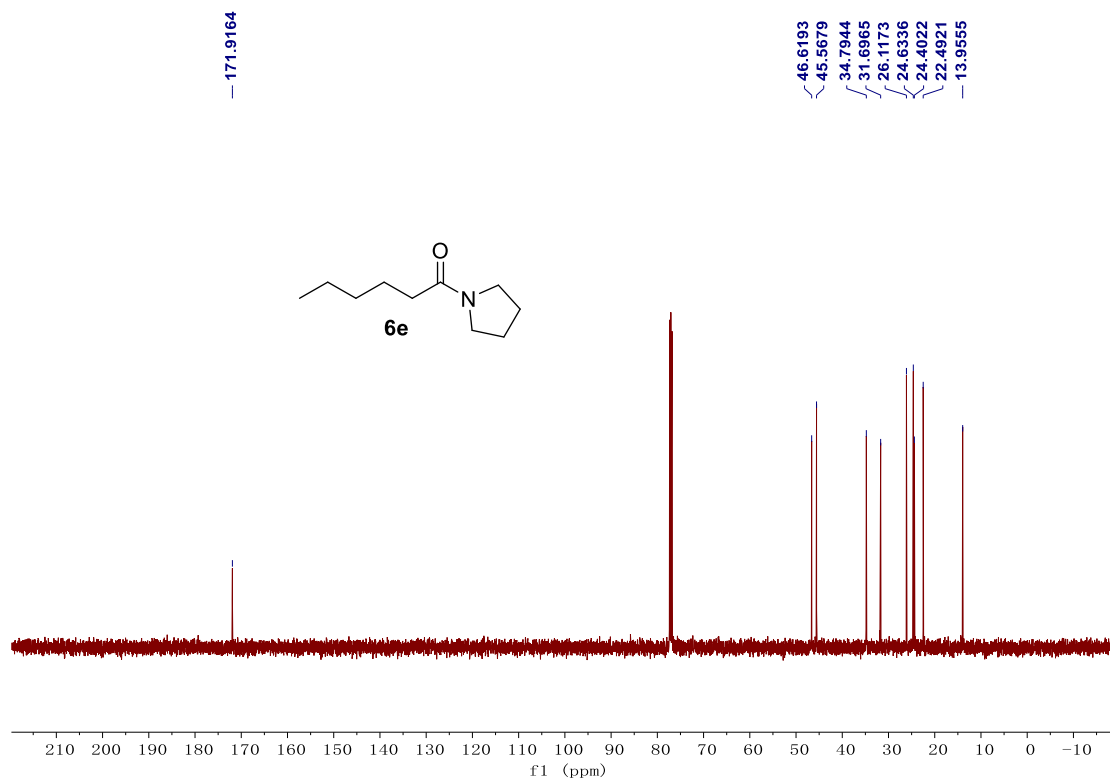

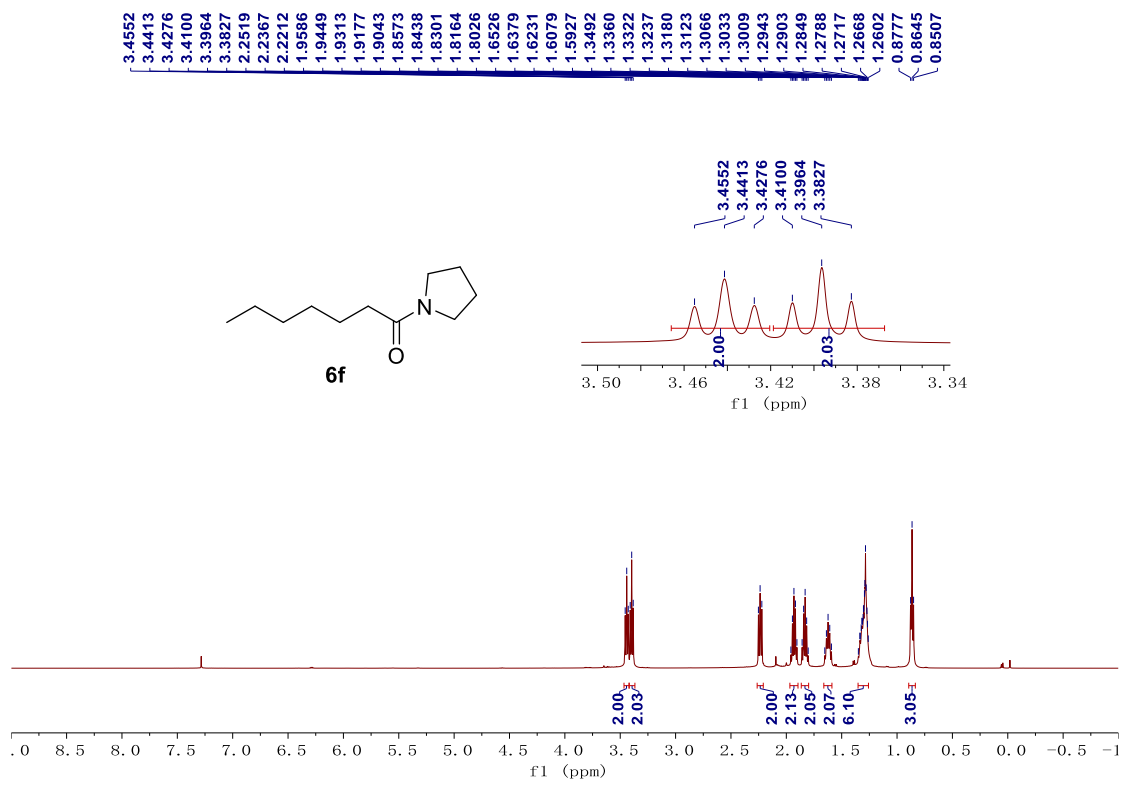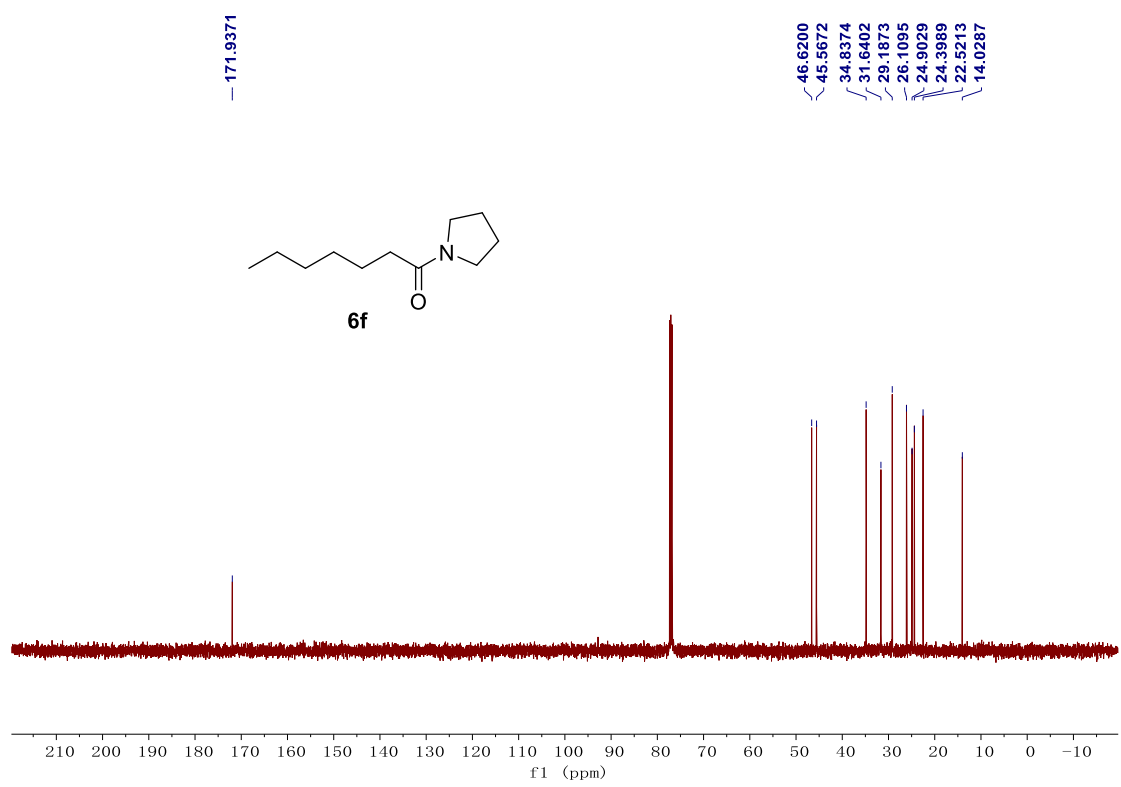

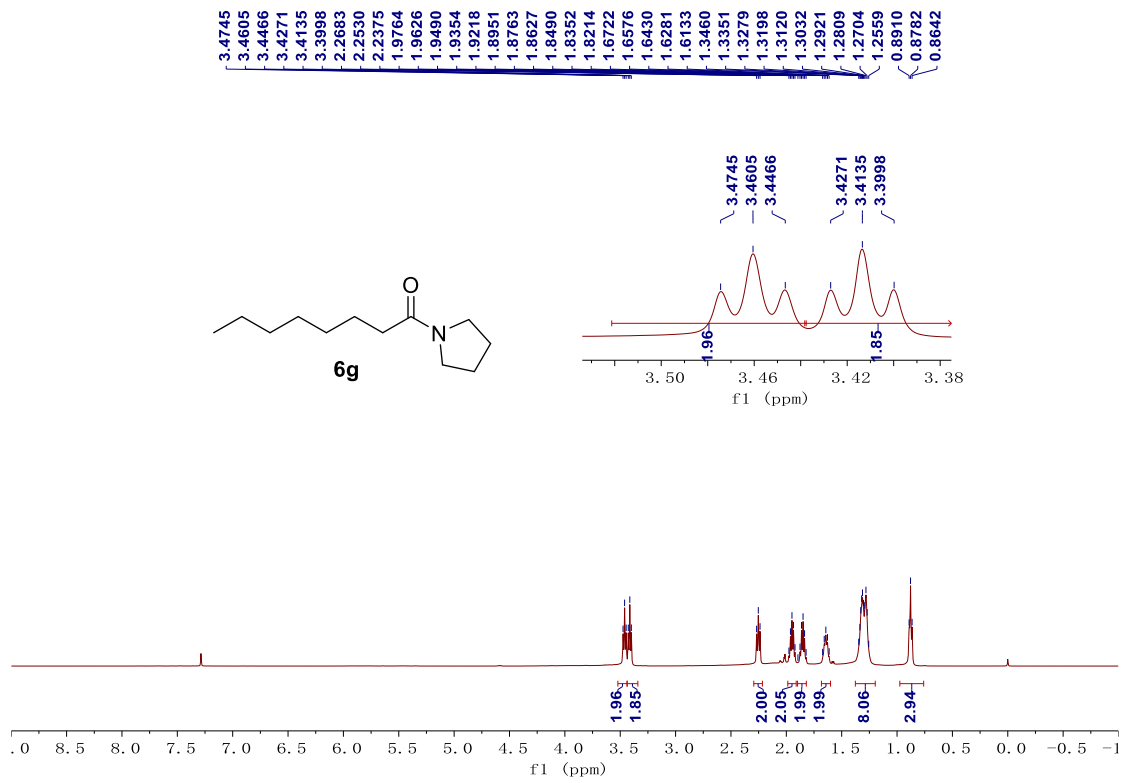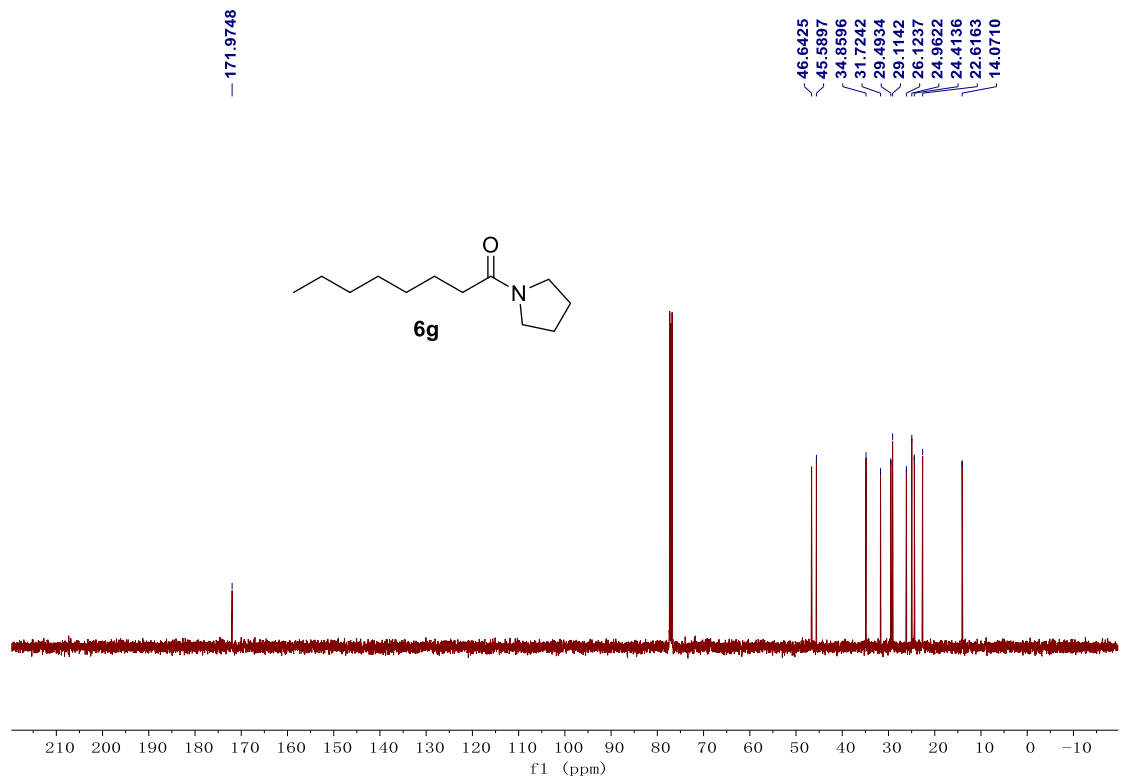

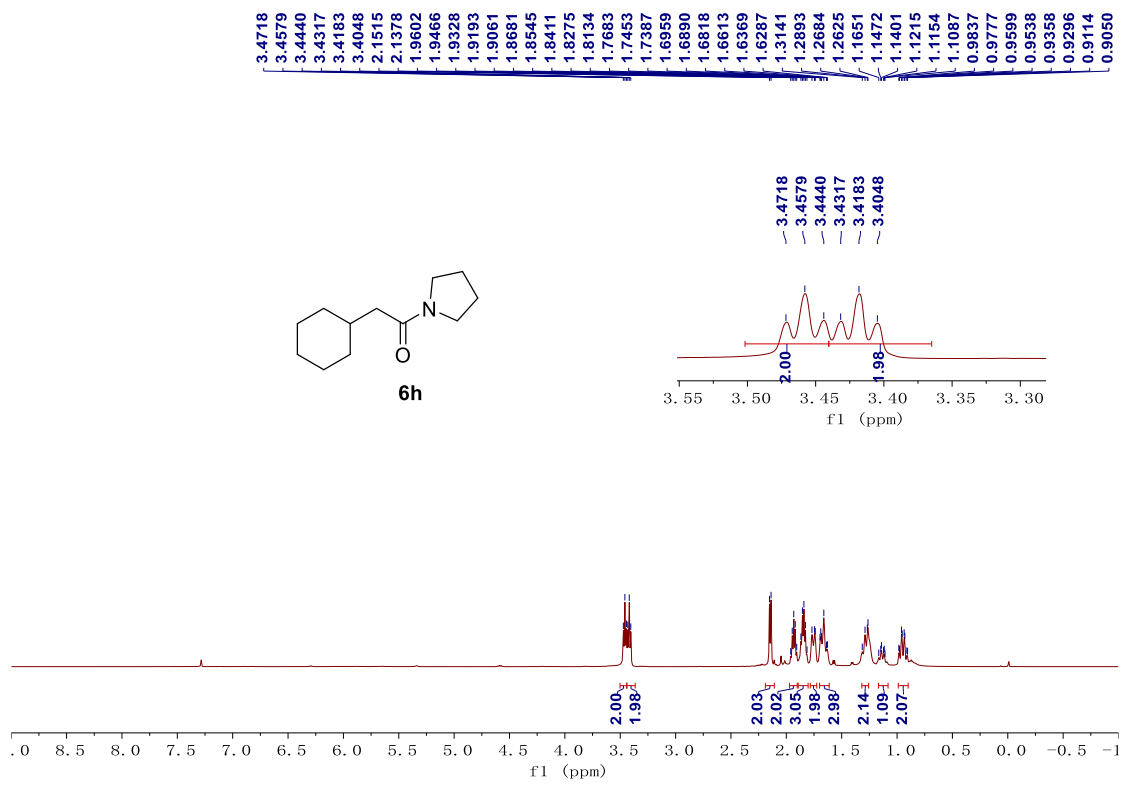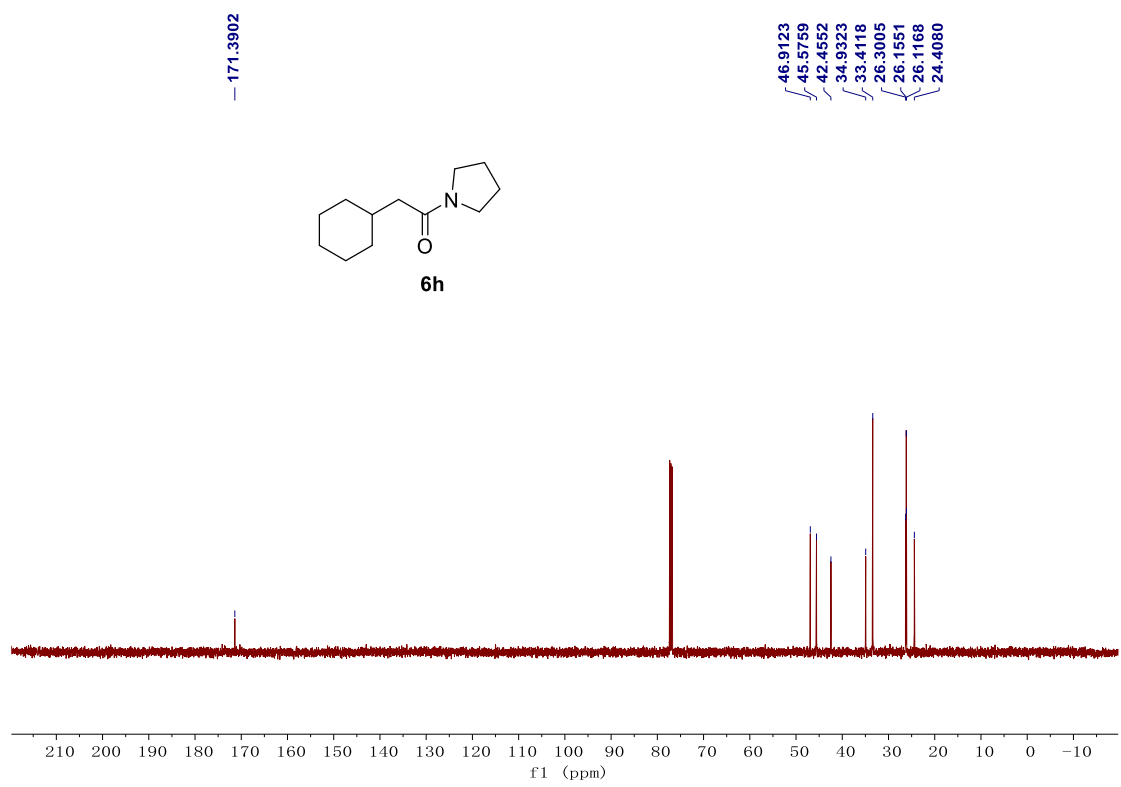

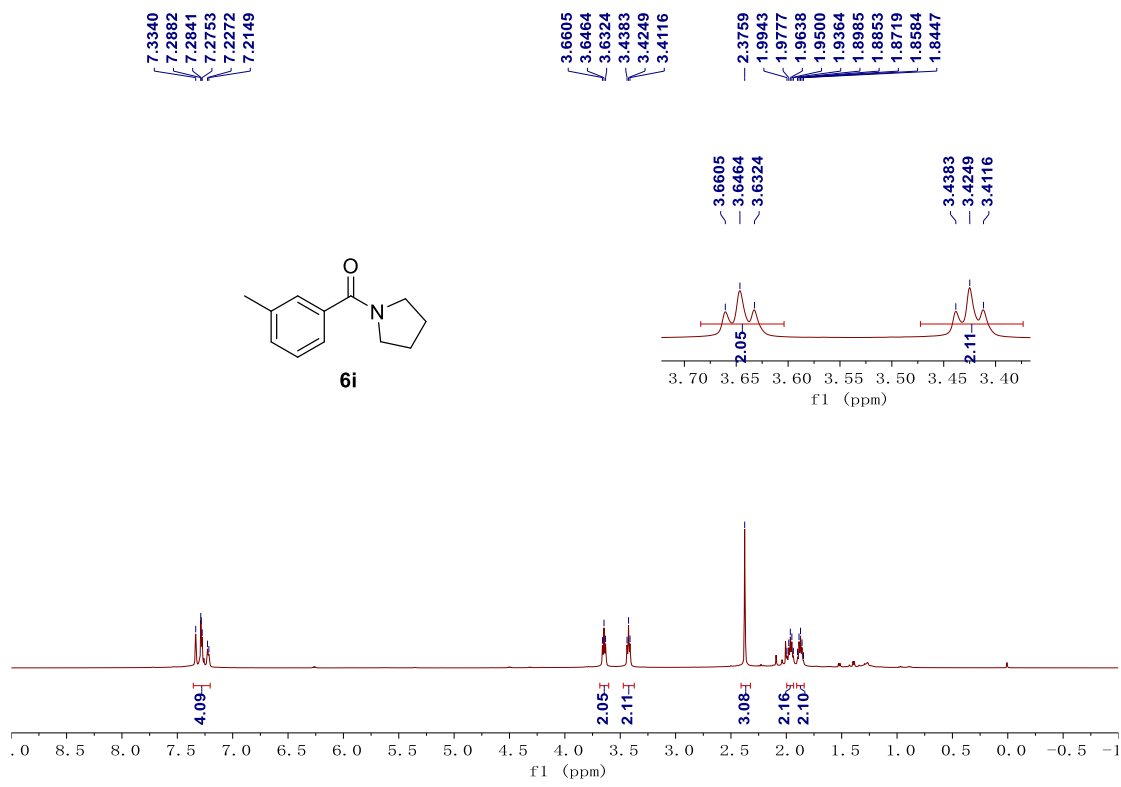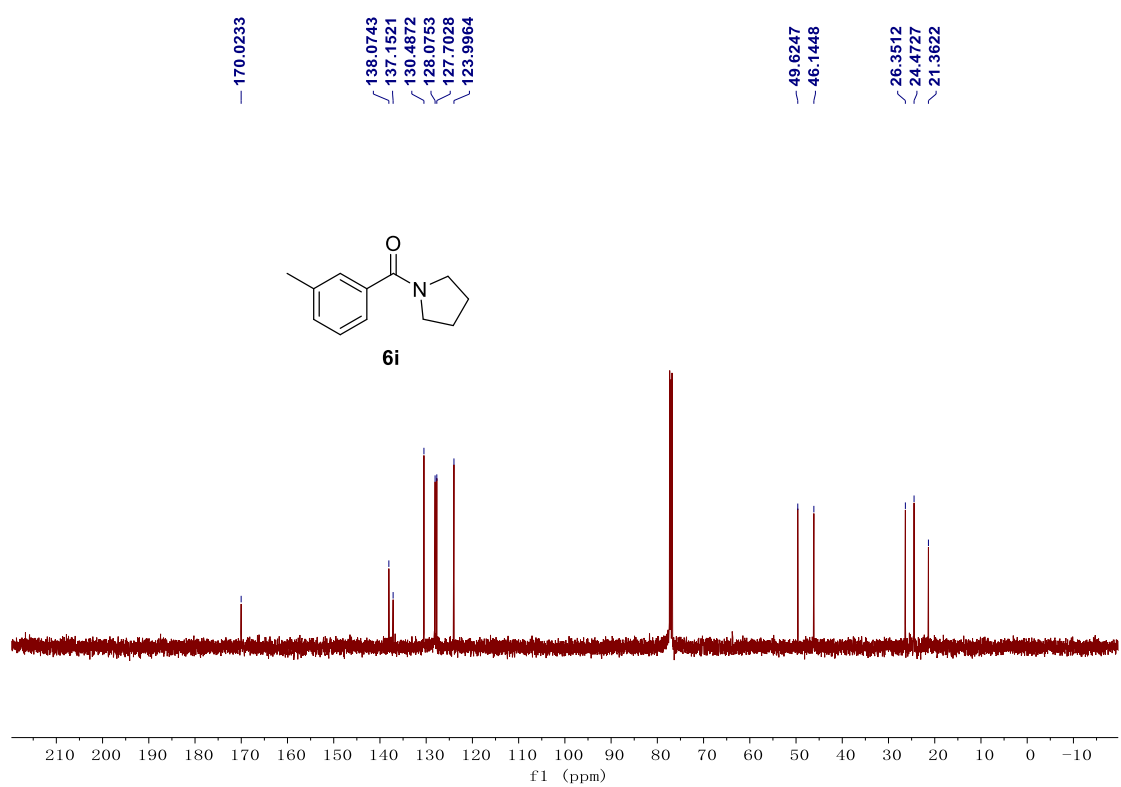

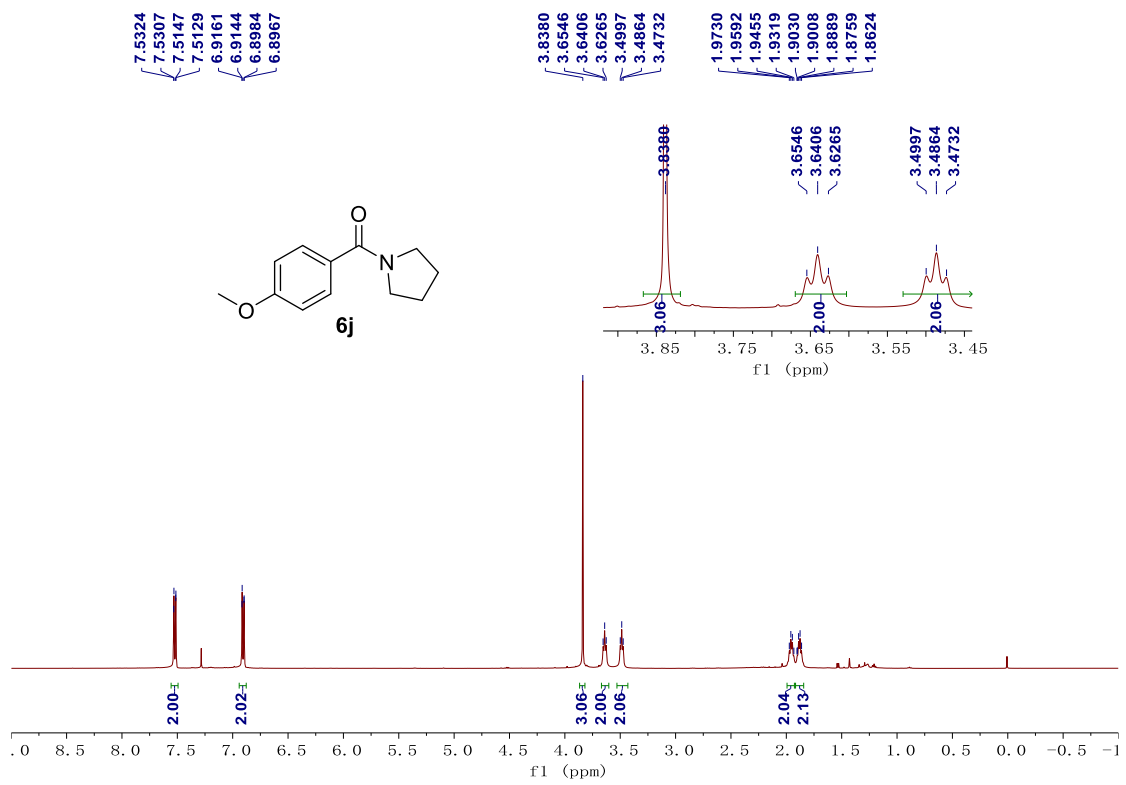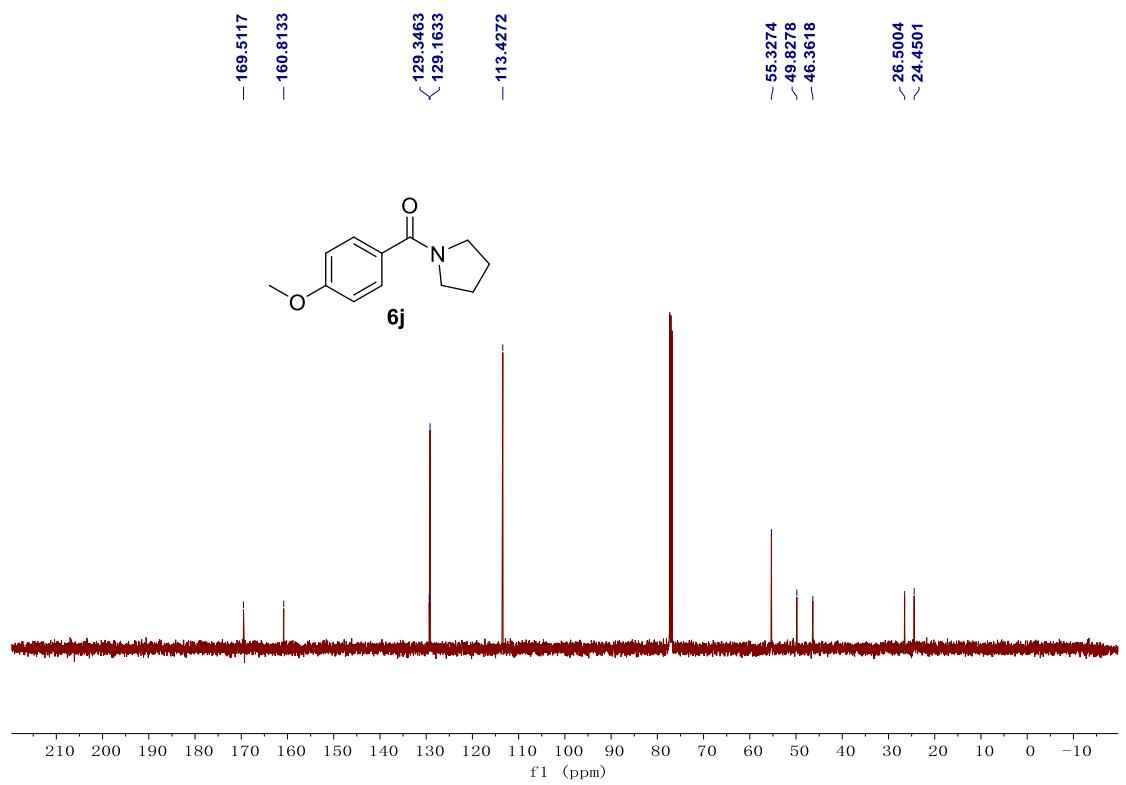



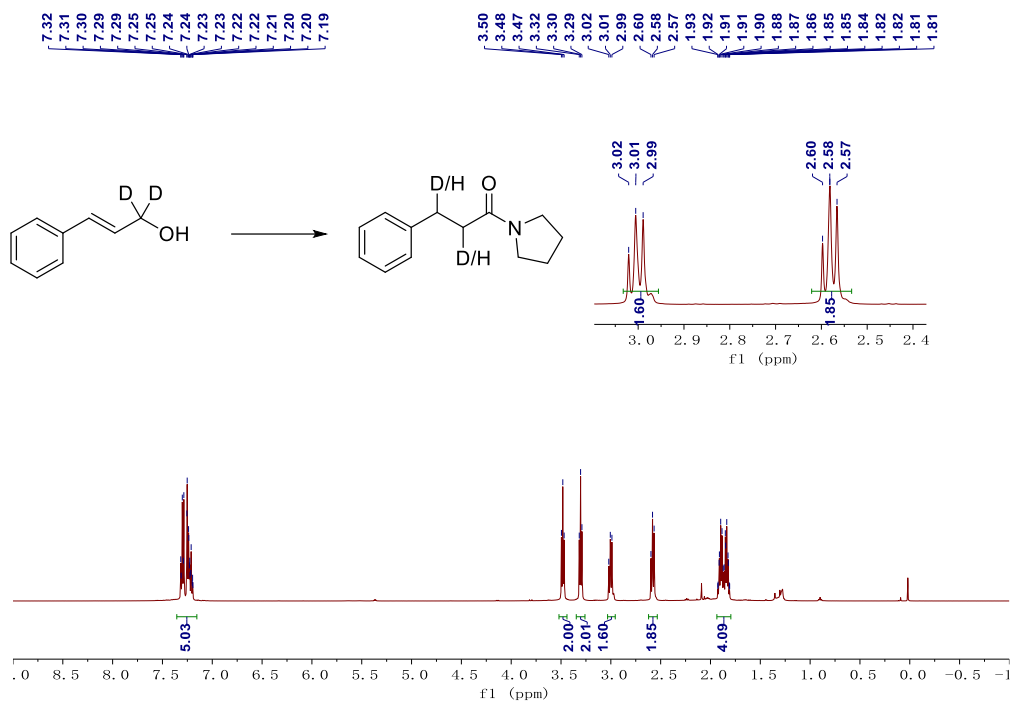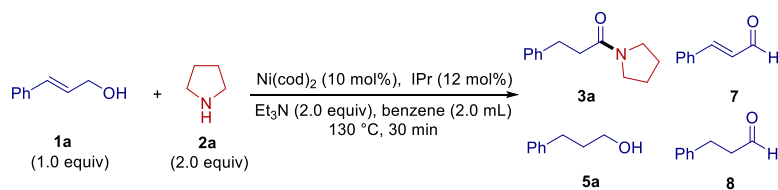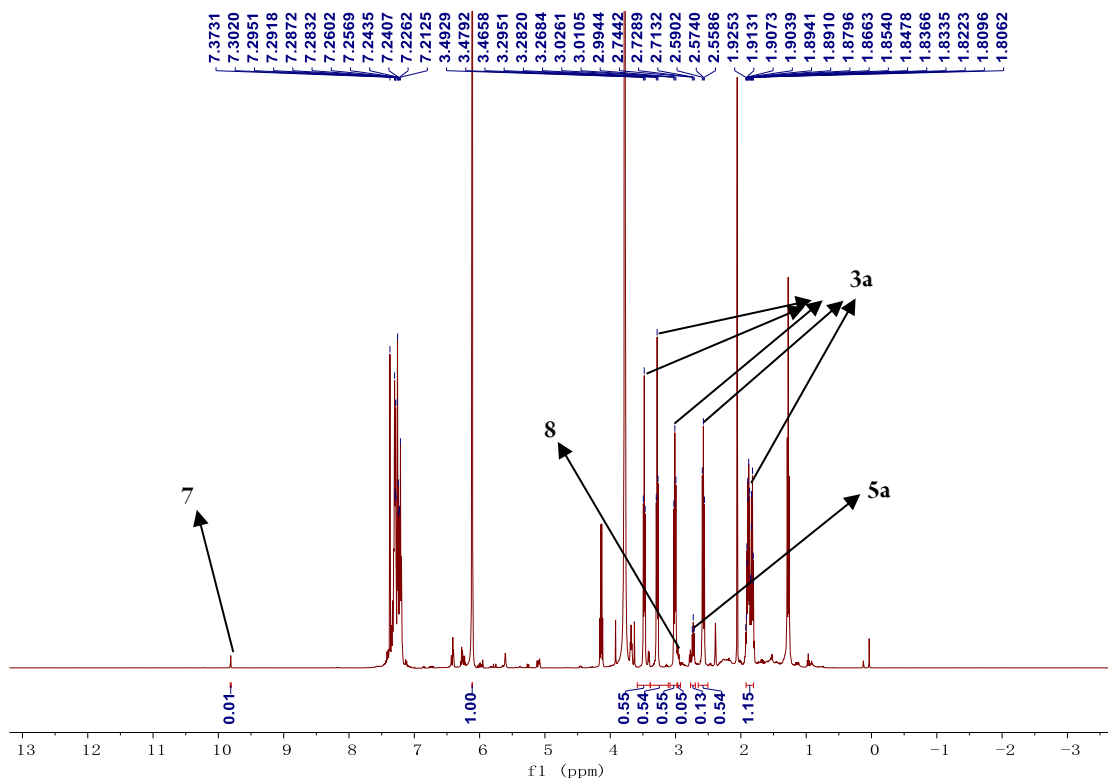

$^1\text{H}$  NMR spectra of the intermediates.

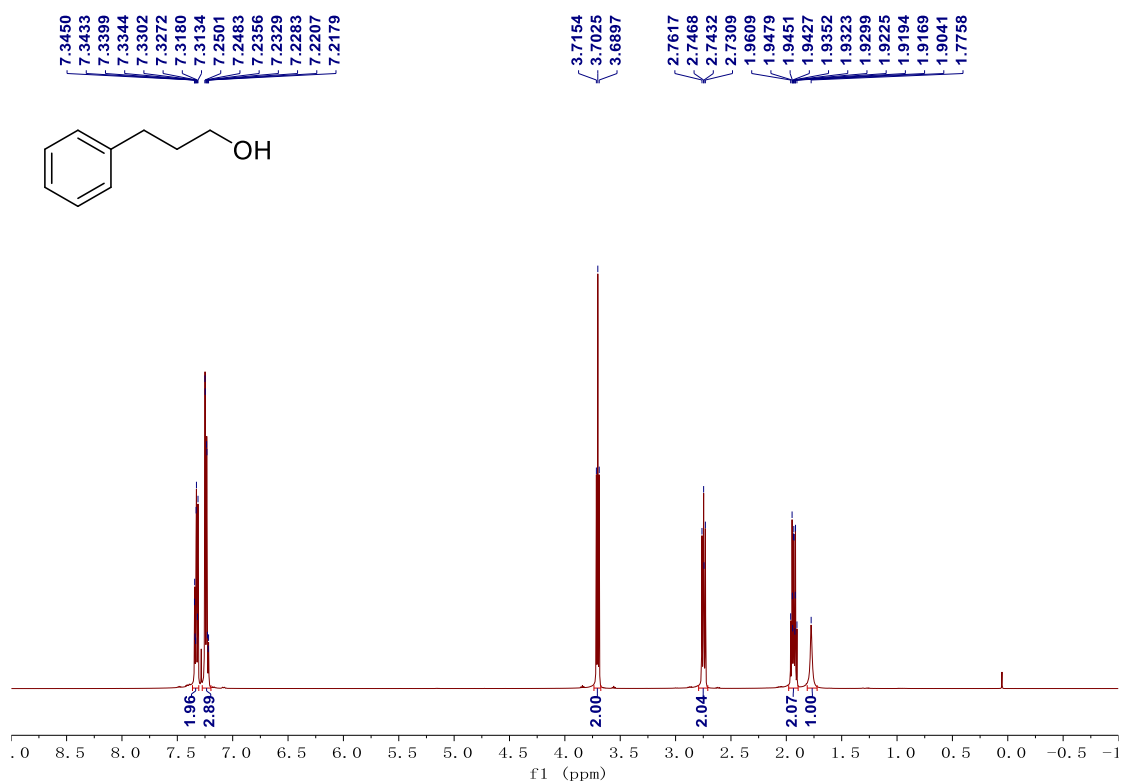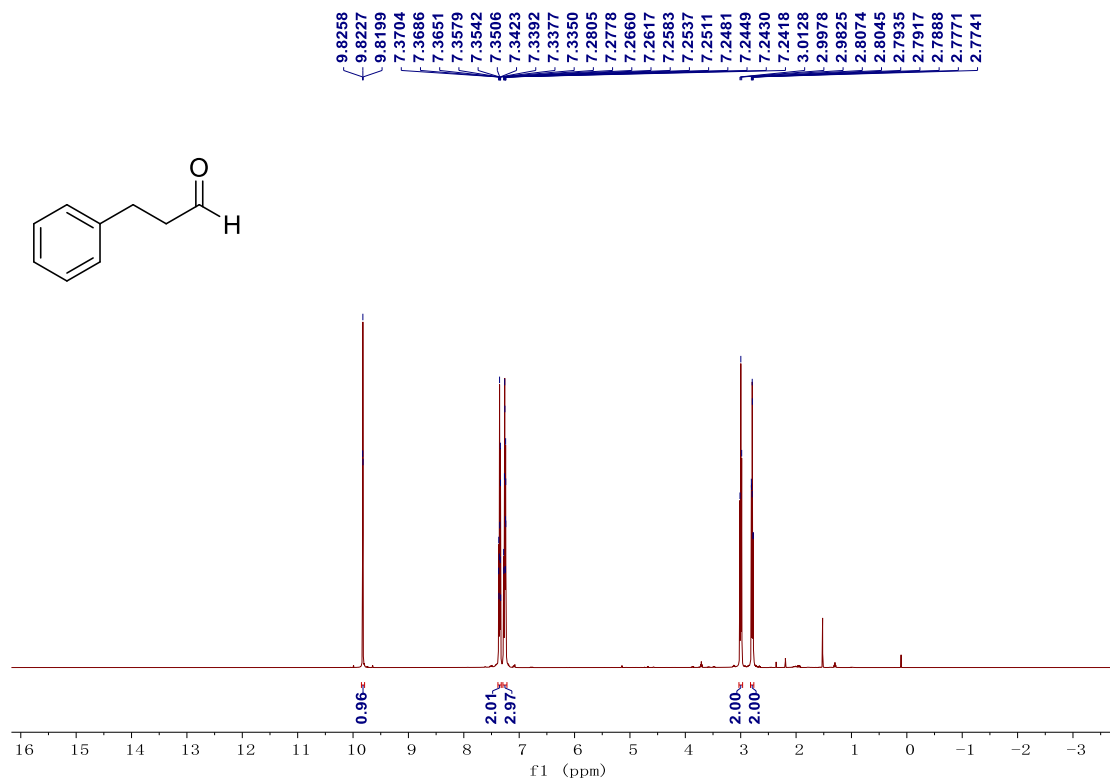

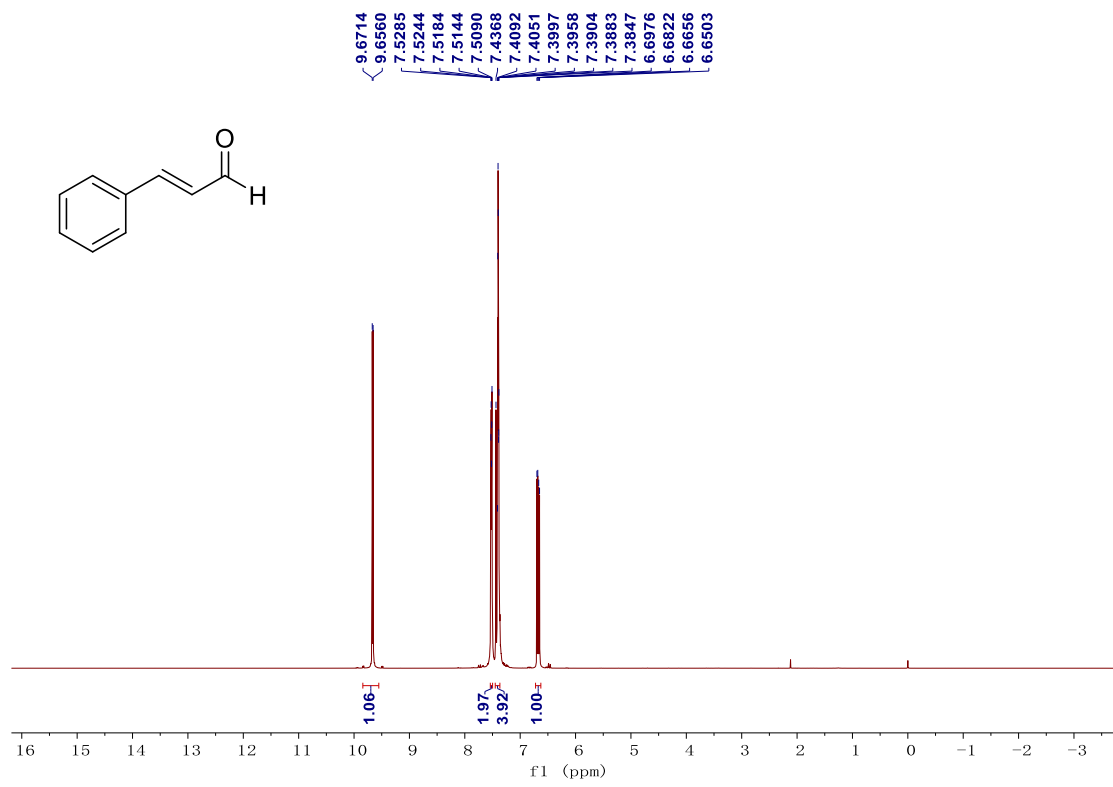

Supplement: d2qo00004k1.pdf [file d2qo00004k1.pdf]
